# Supplementary material for: THE THERMODYNAMIC PROPERTIES OF THE GASEOUS CARBON MONOXIDE
Source: Royal Society of Chemistry journal article supplement (doi:10.1039/d3fd00090g), 1953-05-01

# Solvent-dependent iodide interactions in LiO<sub>2</sub> electrolytes – a molecular dynamics study

## Electronic supplementary information

Erlendur Jónsson, Astrid H. Berge, Israel Temprano and Clare P. Grey

### Contents

|          |                                                         |          |
|----------|---------------------------------------------------------|----------|
| <b>1</b> | <b>Composition of simulation boxes</b>                  | <b>2</b> |
| <b>2</b> | <b>Radial Distribution Functions and their CN plots</b> | <b>3</b> |
| 2.1      | I <sup>-</sup> – H-H <sub>2</sub> O . . . . .           | 3        |
| 2.2      | I <sup>-</sup> – H-solvent . . . . .                    | 9        |
| 2.3      | I <sup>-</sup> – I <sup>-</sup> . . . . .               | 17       |
| 2.4      | I <sup>-</sup> – O-solvent . . . . .                    | 25       |
| 2.5      | I <sup>-</sup> – N-TFSI . . . . .                       | 33       |
| 2.6      | I <sup>-</sup> – Li <sup>+</sup> . . . . .              | 40       |
| 2.7      | Li <sup>+</sup> – I <sup>-</sup> . . . . .              | 48       |
| 2.8      | Li <sup>+</sup> – Li <sup>+</sup> . . . . .             | 56       |
| 2.9      | Li <sup>+</sup> – TFSI . . . . .                        | 64       |
| 2.10     | Li <sup>+</sup> – O-H <sub>2</sub> O . . . . .          | 71       |
| 2.11     | Li <sup>+</sup> – O-solvent . . . . .                   | 77       |

# 1 Composition of simulation boxes

Table 1: The number of Li, I<sup>-</sup>, TFSI and solvent molecules in the simulation boxes

| System | Li <sup>+</sup> | I <sup>-</sup> | TFSI | Solvents |      |      |      |
|--------|-----------------|----------------|------|----------|------|------|------|
|        |                 |                |      | G1       | G2   | G3   | G4   |
| 50 mM  | 160             | 20             | 140  | 3850     | 2790 | 2210 | 1815 |
| 100 mM | 160             | 40             | 120  | 3850     | 2790 | 2210 | 1815 |
| 200 mM | 160             | 80             | 80   | 3850     | 2790 | 2210 | 1815 |
| 300 mM | 160             | 120            | 40   | 3850     | 2790 | 2210 | 1815 |
| 400 mM | 160             | 160            | 0    | 3850     | 2790 | 2210 | 1815 |

Table 2: The number of water molecules in the simulation boxes

| Water      |     |
|------------|-----|
| Neat       | 0   |
| 1,000 ppm  | 40  |
| 5,000 ppm  | 115 |
| 20,000 ppm | 530 |

## 2 Radial Distribution Functions and their CN plots

Each of the following subsections are structured so that they start with an overview plot. These overview plots show the coordination number as a function of  $[I^-]$  at a fixed distance between the reference atom (either  $I^-$  or  $Li^+$ ) and the atom(s) of interest. The figures are then followed by the radial distribution functions and the coordination numbers plots of each system. To make comparison easier, these plots were collated around the glymes.

### 2.1 $I^- - H-H_2O$

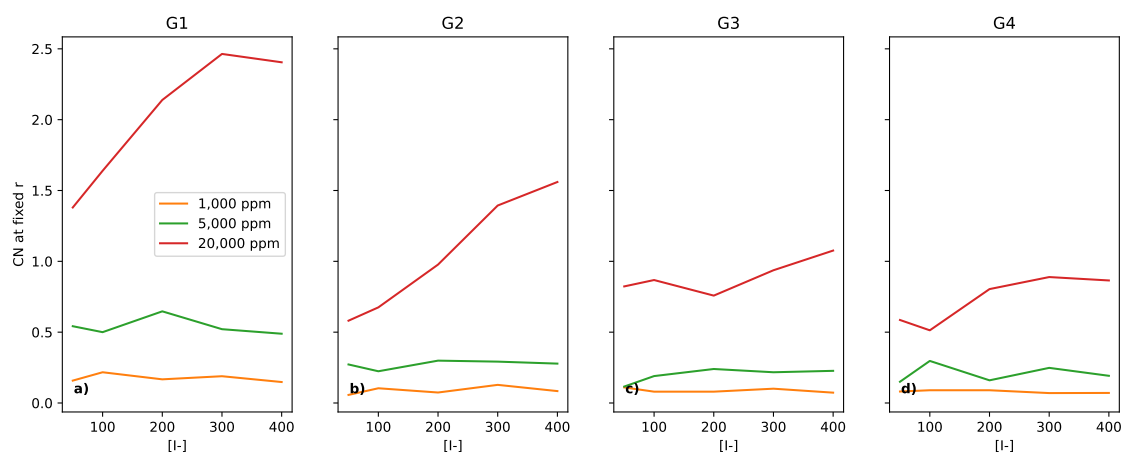

Figure 1: Coordination number of  $I^-$  to H (of  $H_2O$ ) at a fixed distance of  $3 \text{ \AA}$ , for the three different water containing systems (1,000 ppm = yellow, 5,000 ppm = green and 20,000 ppm = red) studied here, across the four different solvents ( with a): G1, b): G2, c): G3 and d): G4).

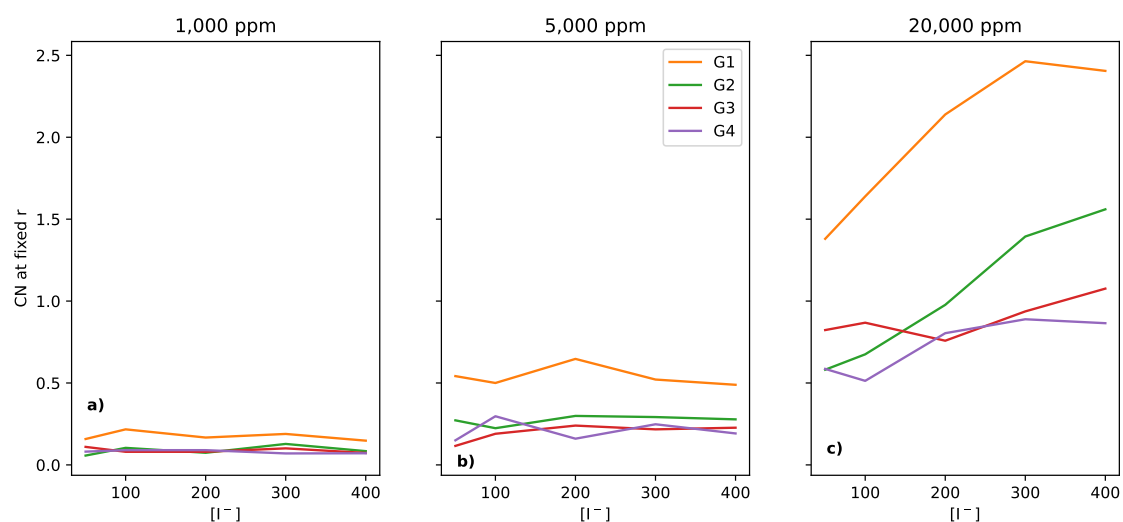

Figure 2: Coordination number of  $I^-$  to H (of  $H_2O$ ) at a fixed distance of  $3 \text{ \AA}$ , for the four different glymes (G1 = yellow, G2 = green, G3 = red, G4 = purple) studied here, across the three different water containing systems (with a): 1,000, b): 5,000, c): 20,000 ppm of water).

**I<sup>-</sup> – H-H<sub>2</sub>O 50mM 1,000 ppm**

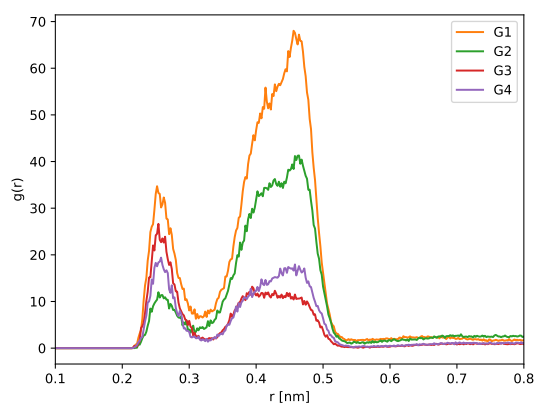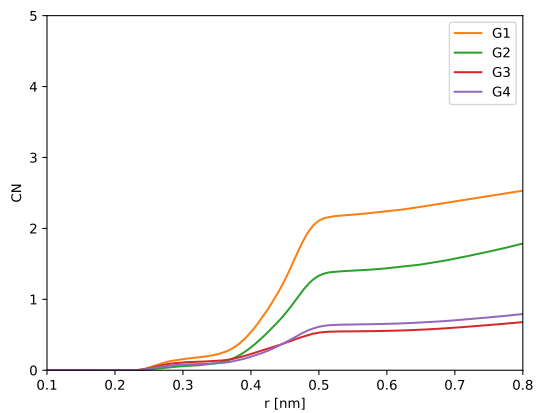

**I<sup>-</sup> – H-H<sub>2</sub>O 50mM 5,000 ppm**

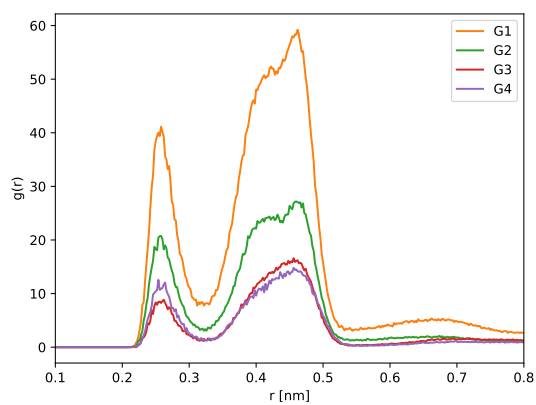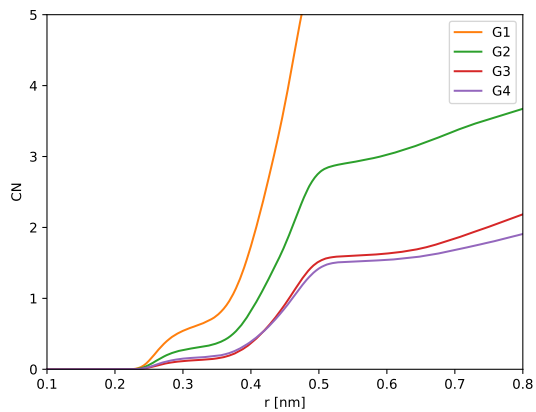

**I<sup>-</sup> – H-H<sub>2</sub>O 50mM 20,000 ppm**

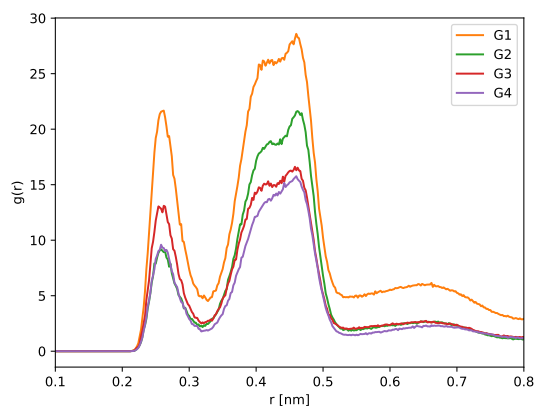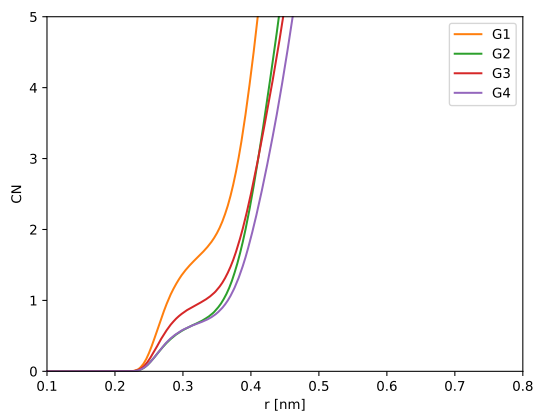

**I<sup>-</sup> - H-H<sub>2</sub>O 100mM 1,000 ppm**

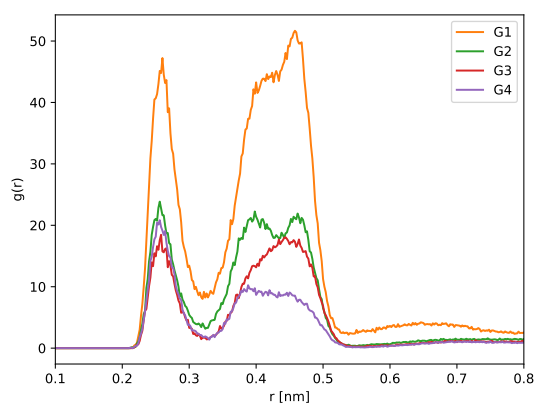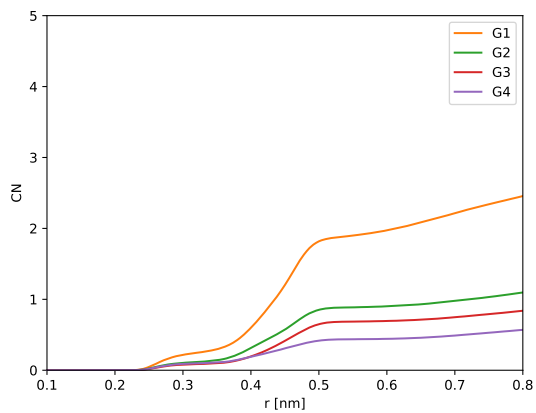

**I<sup>-</sup> - H-H<sub>2</sub>O 100mM 5,000 ppm**

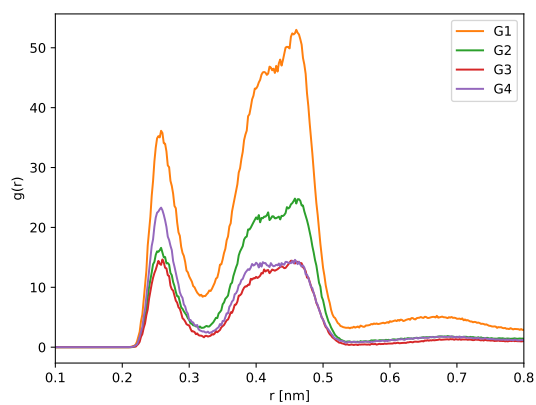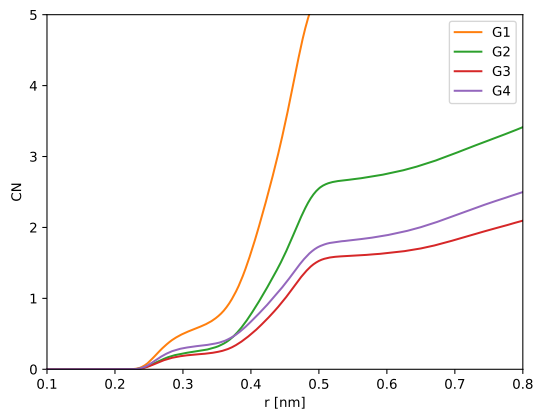

**I<sup>-</sup> - H-H<sub>2</sub>O 100mM 20,000 ppm**

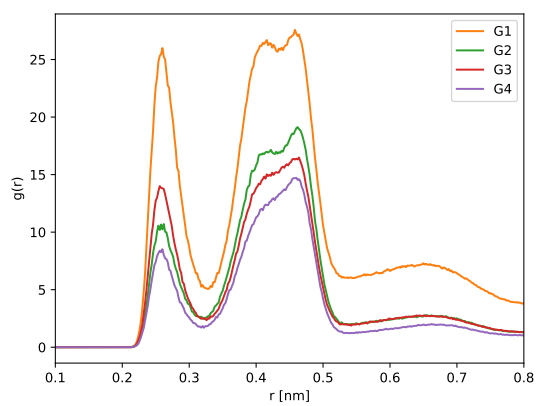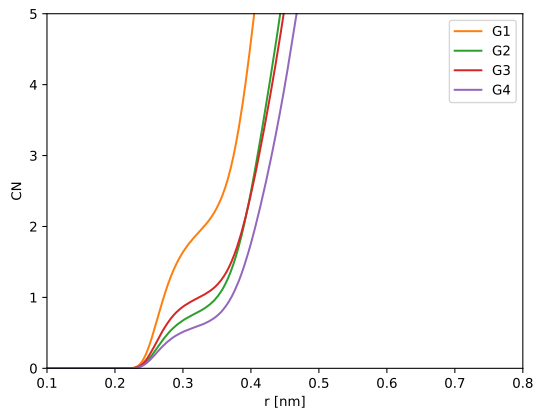

**I<sup>-</sup> – H-H<sub>2</sub>O 200mM 1,000 ppm**

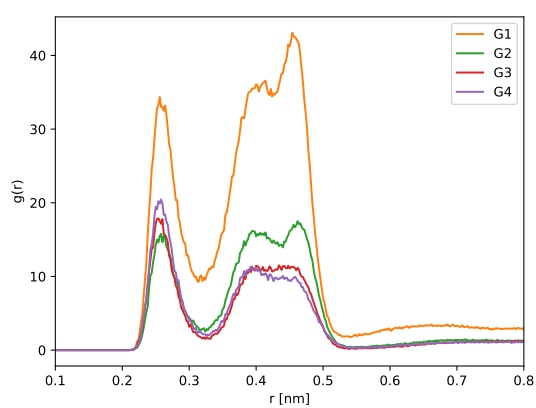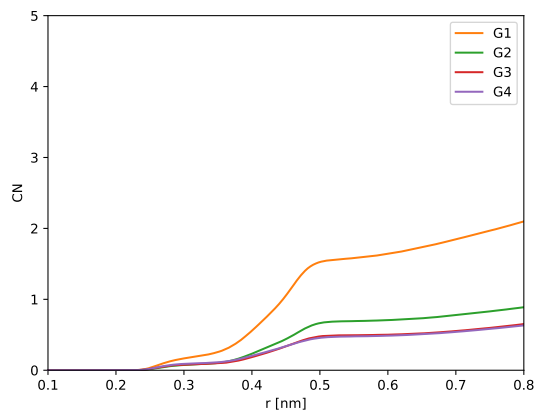

**I<sup>-</sup> – H-H<sub>2</sub>O 200mM 5,000 ppm**

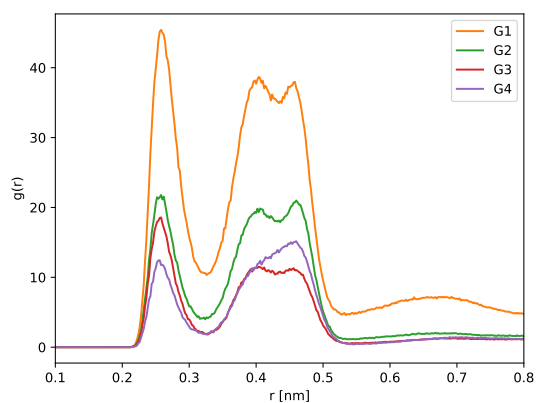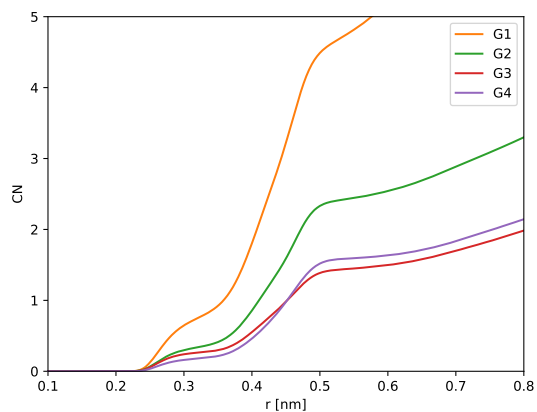

**I<sup>-</sup> – H-H<sub>2</sub>O 200mM 20,000 ppm**

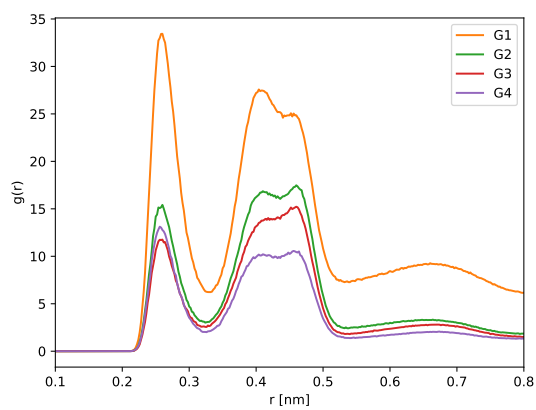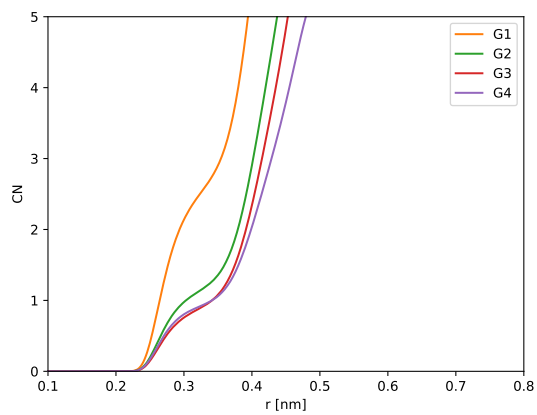

**I<sup>-</sup> – H-H<sub>2</sub>O 300mM 1,000 ppm**

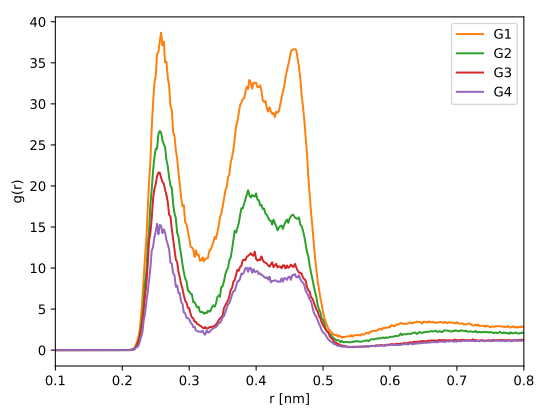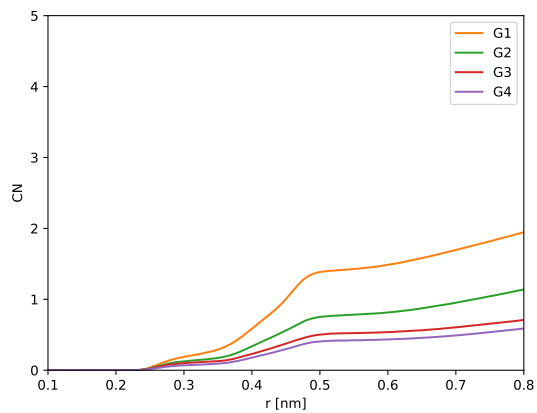

**I<sup>-</sup> – H-H<sub>2</sub>O 300mM 5,000 ppm**

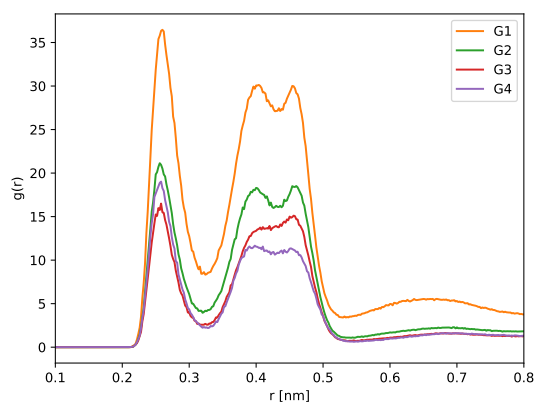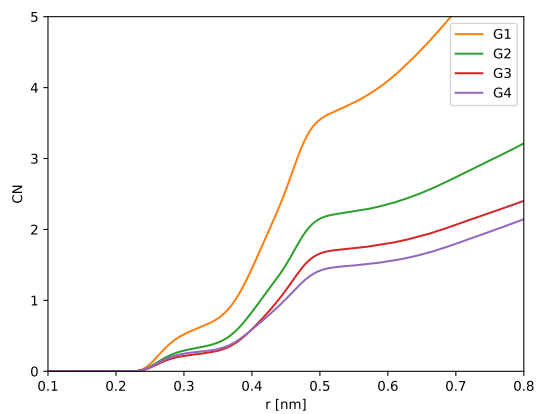

**I<sup>-</sup> – H-H<sub>2</sub>O 300mM 20,000 ppm**

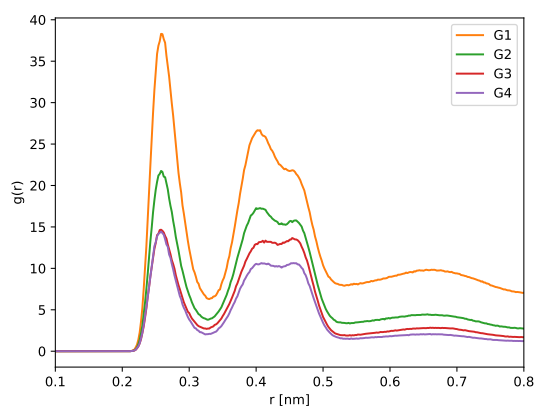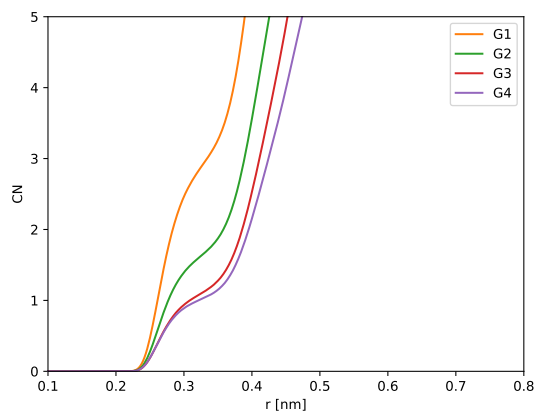

**I<sup>-</sup> – H-H<sub>2</sub>O 400mM 1,000 ppm**

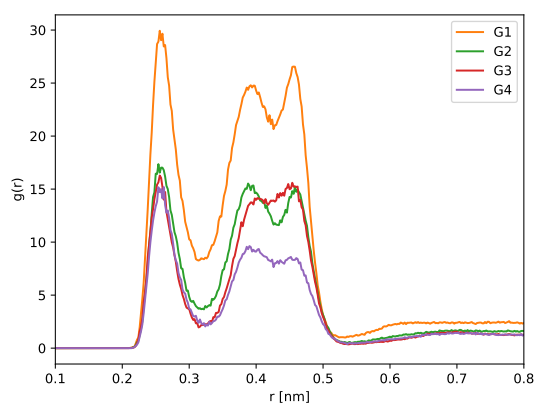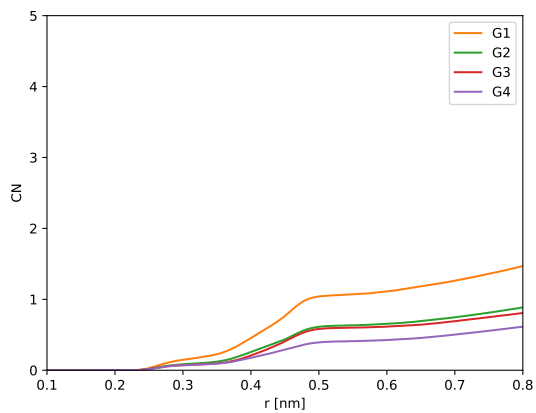

**I<sup>-</sup> – H-H<sub>2</sub>O 400mM 5,000 ppm**

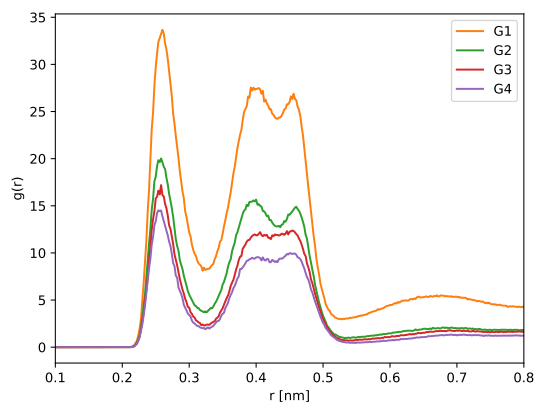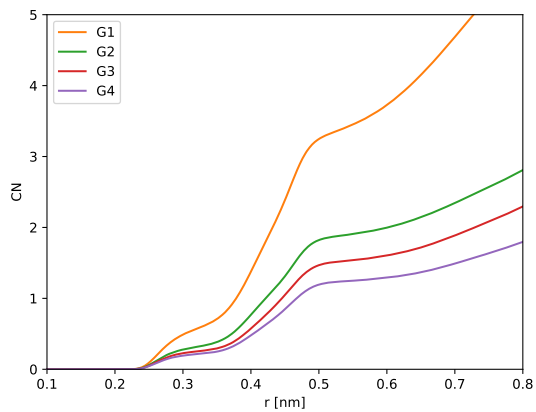

**I<sup>-</sup> – H-H<sub>2</sub>O 400mM 20,000 ppm**

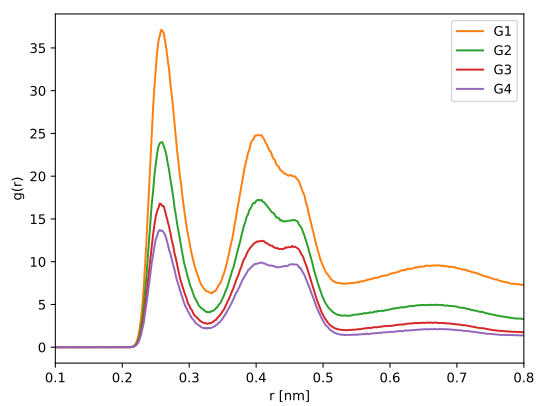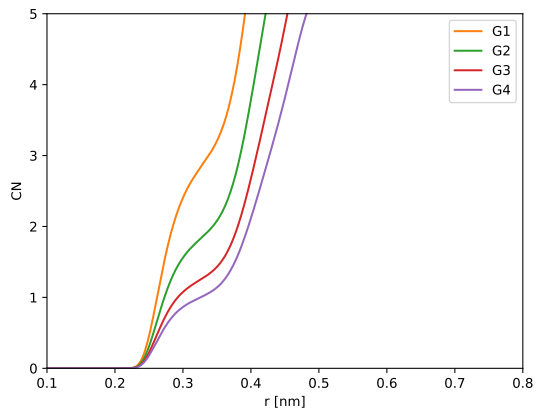



## 2.2 I<sup>-</sup> – H-solvent

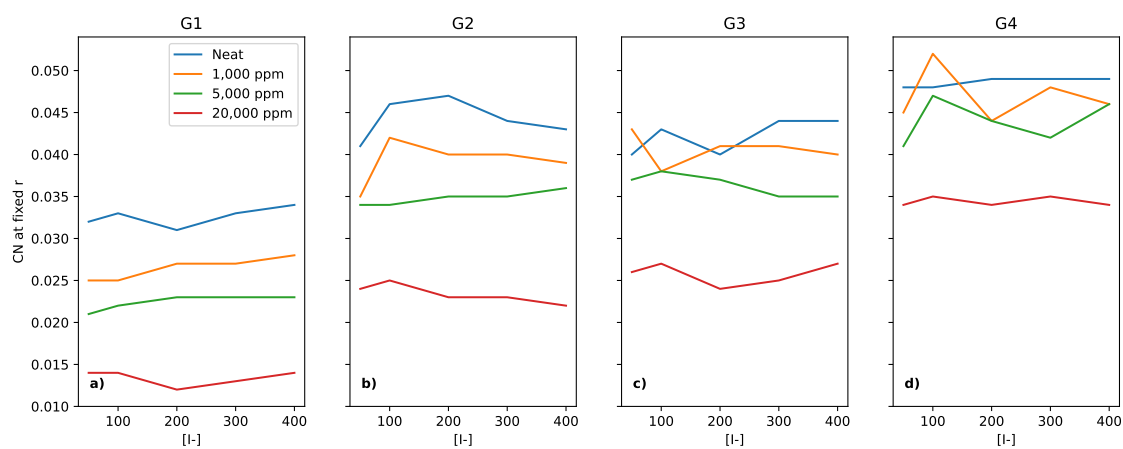

Figure 3: Coordination number of I<sup>-</sup> to H (of the solvent) at a fixed distance of 3 Å, for the four different water containing systems (neat = blue, 1,000 ppm = yellow, 5,000 ppm = green and 20,000 ppm = red) studied here, across the four different solvents (with a): G1, b): G2, c): G3 and d): G4).

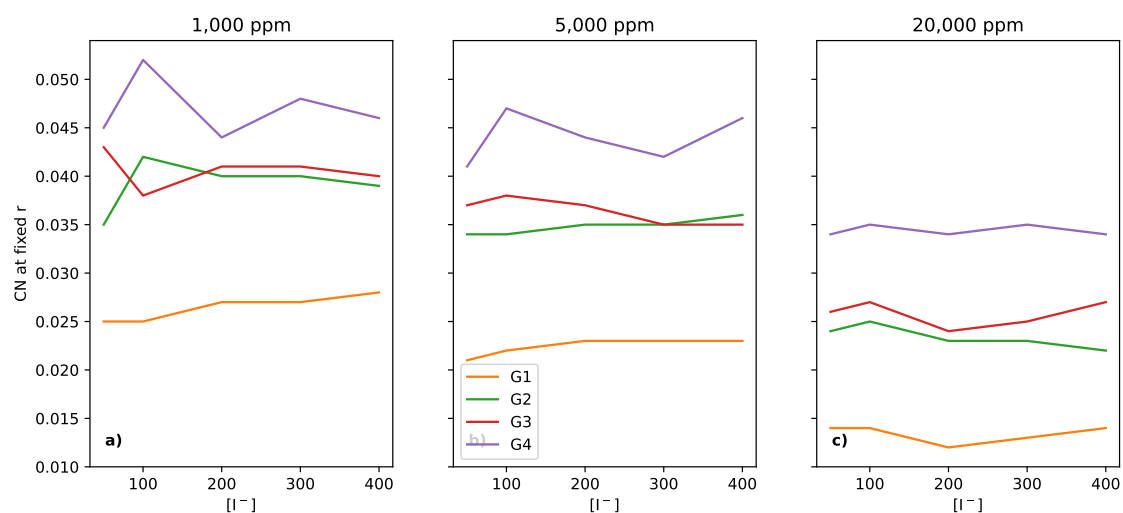

Figure 4: Coordination number of I<sup>-</sup> to H (of the solvent) at a fixed distance of 3 Å, for the four different glymes (G1 = yellow, G2 = green, G3 = red, G4 = purple) studied here, across the four different water concentrations (with a): neat, b): 1,000, c): 5,000, d): 20,000 ppm of water).

**I<sup>-</sup> - H-solvent 50mM neat**

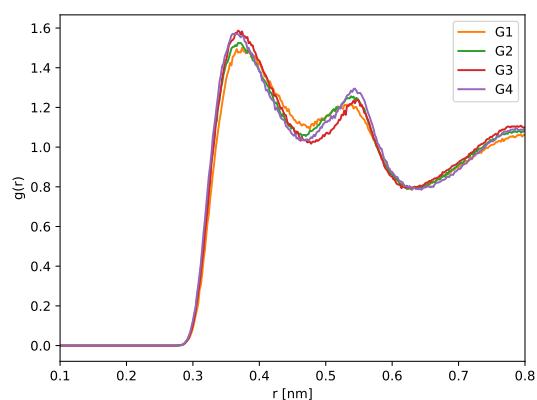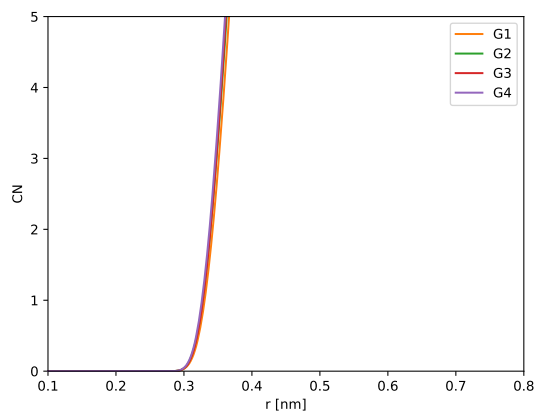

**I<sup>-</sup> - H-solvent 50mM 1,000 ppm**

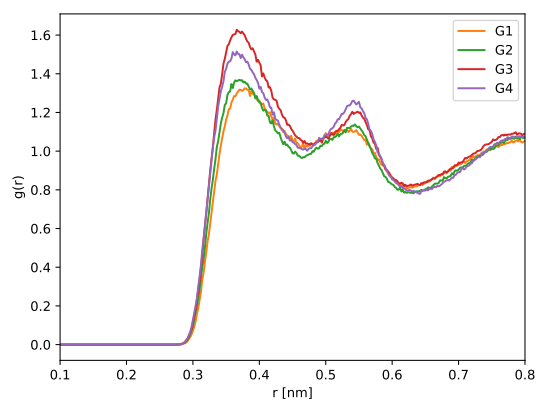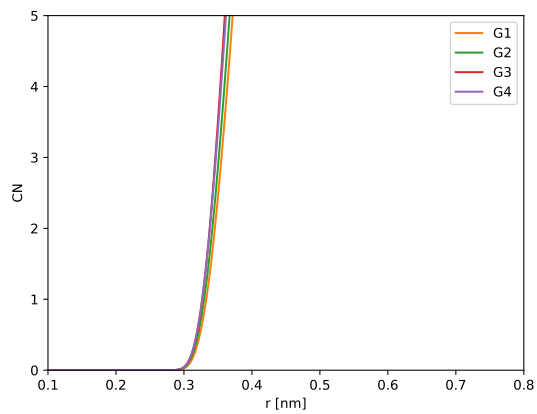

**I<sup>-</sup> - H-solvent 50mM 5,000 ppm**

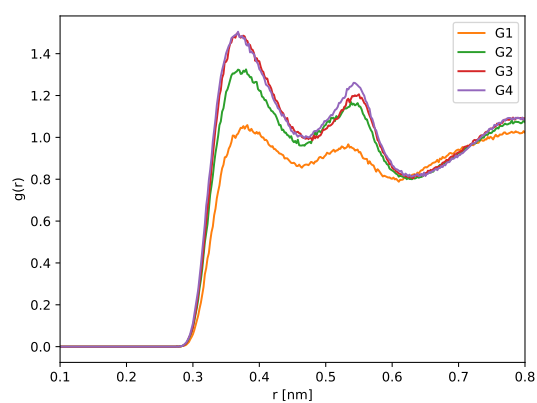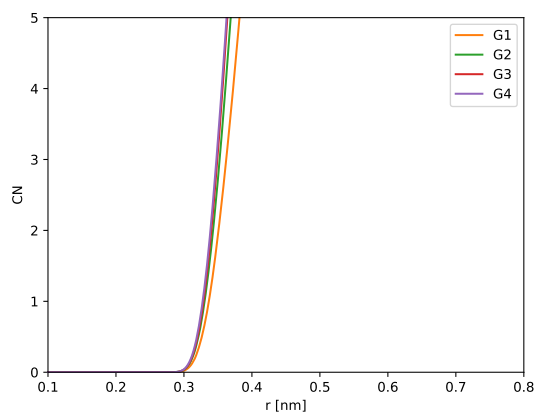

**I<sup>-</sup> – H-solvent 50mM 20,000 ppm**

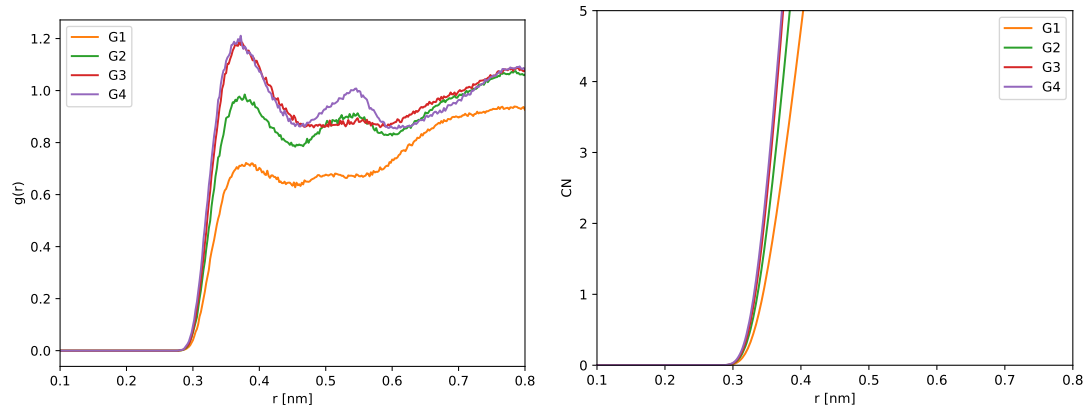

**I<sup>-</sup> – H-solvent 100mM neat**

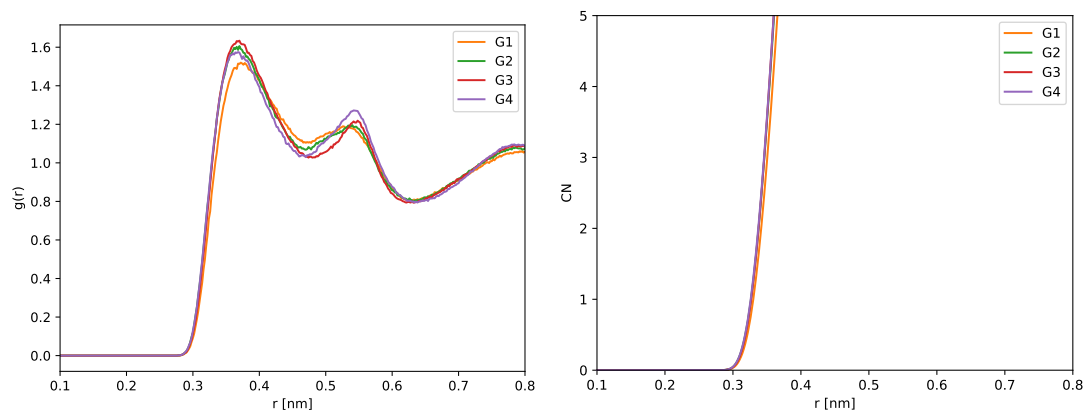

**I<sup>-</sup> – H-solvent 100mM 1,000 ppm**

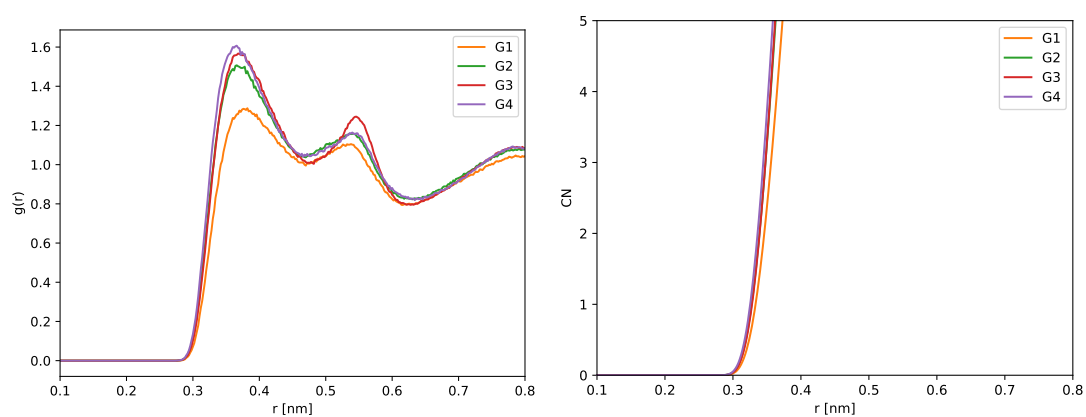

**I<sup>-</sup> – H-solvent 100mM 5,000 ppm**

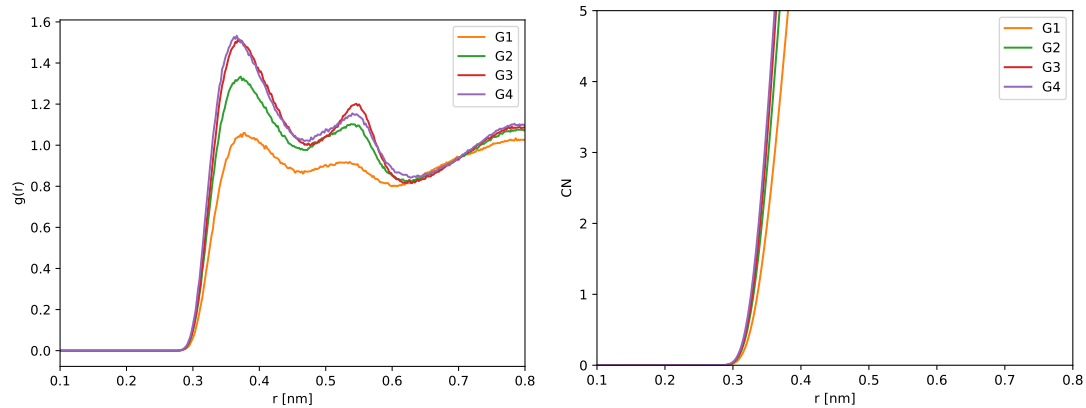

**I<sup>-</sup> – H-solvent 100mM 20,000 ppm**

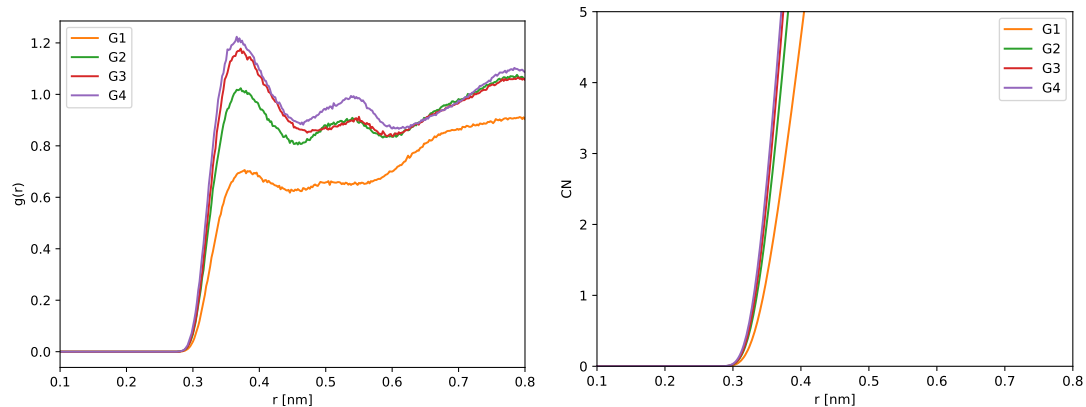

**I<sup>-</sup> – H-solvent 200mM neat**

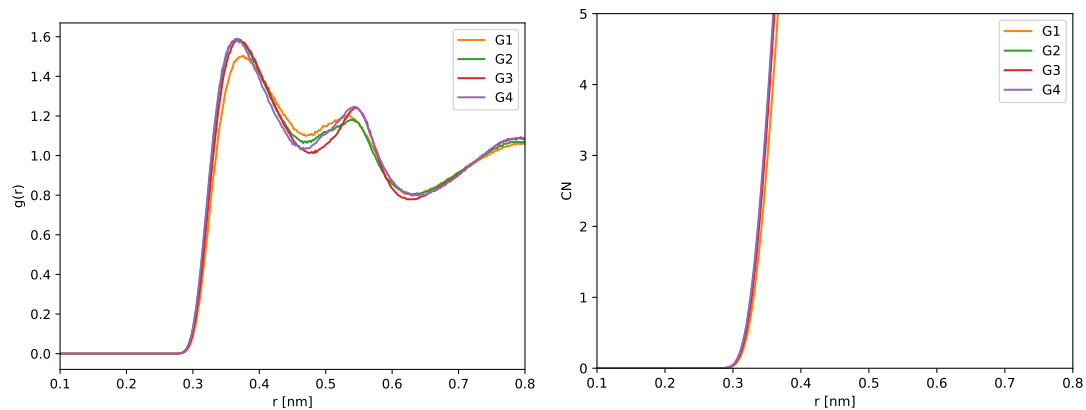

**I<sup>-</sup> – H-solvent 200mM 1,000 ppm**

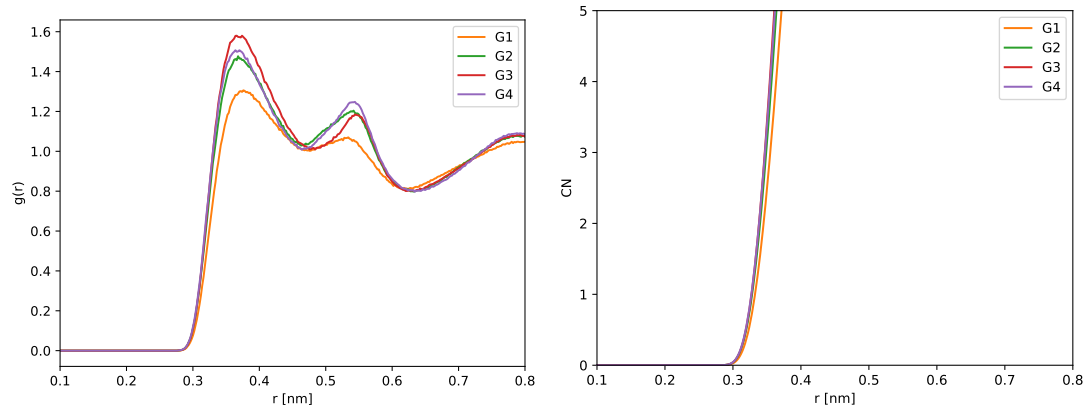

**I<sup>-</sup> – H-solvent 200mM 5,000 ppm**

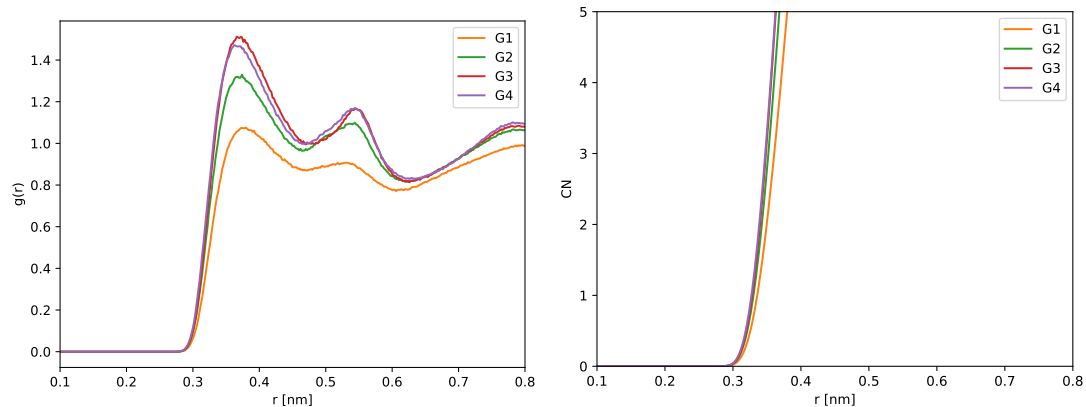

**I<sup>-</sup> – H-solvent 200mM 20,000 ppm**

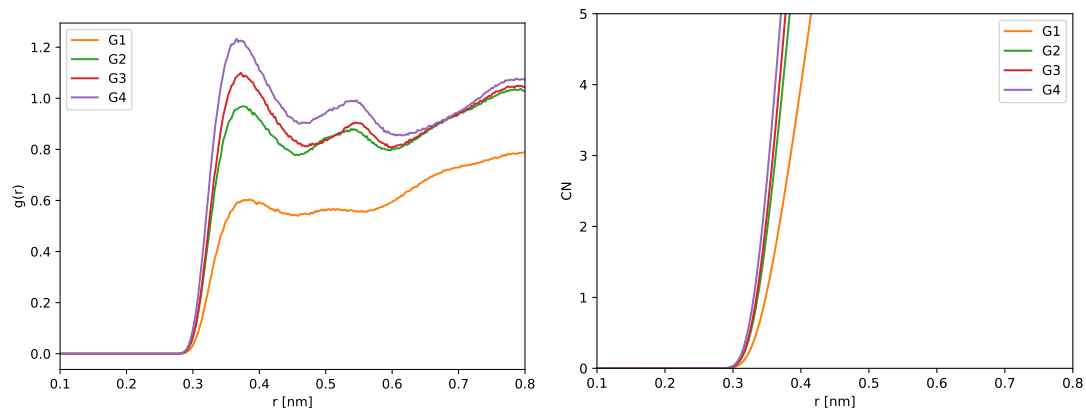

**I<sup>-</sup> – H-solvent 300mM neat**

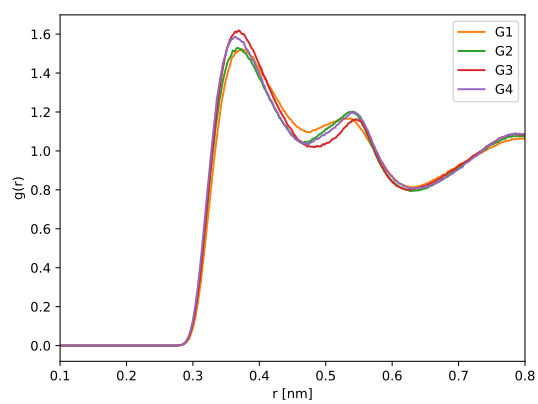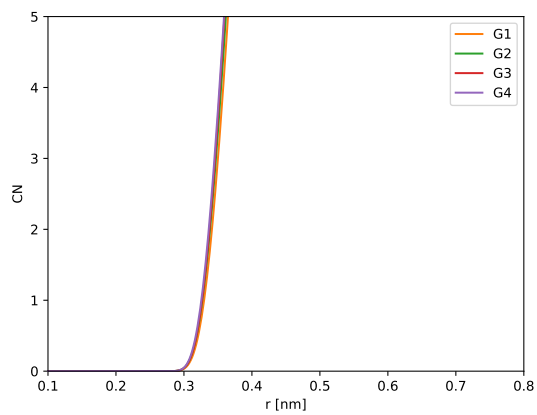

**I<sup>-</sup> – H-solvent 300mM 1,000 ppm**

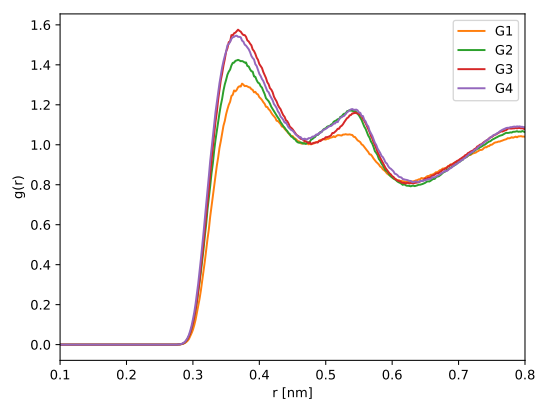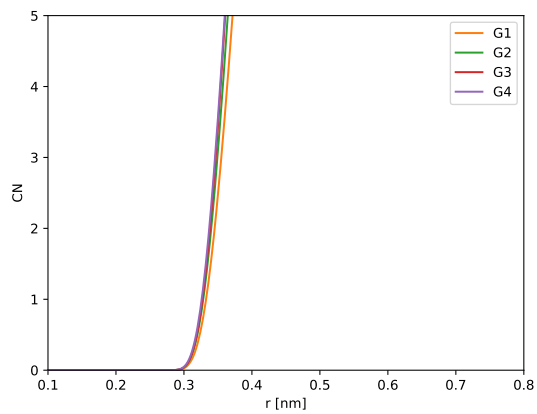

**I<sup>-</sup> – H-solvent 300mM 5,000 ppm**

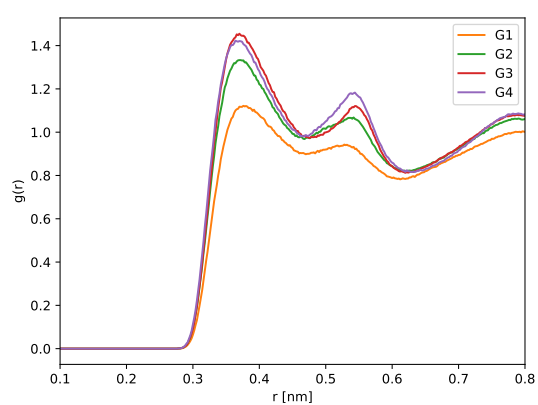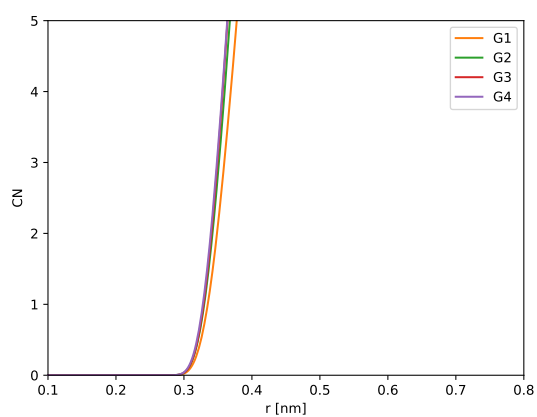

**I<sup>-</sup> – H-solvent 300mM 20,000 ppm**

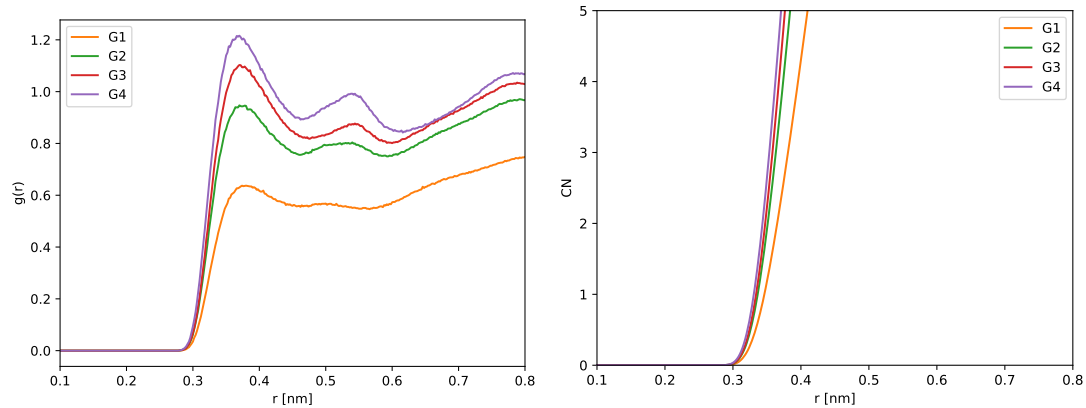

**I<sup>-</sup> – H-solvent 400mM neat**

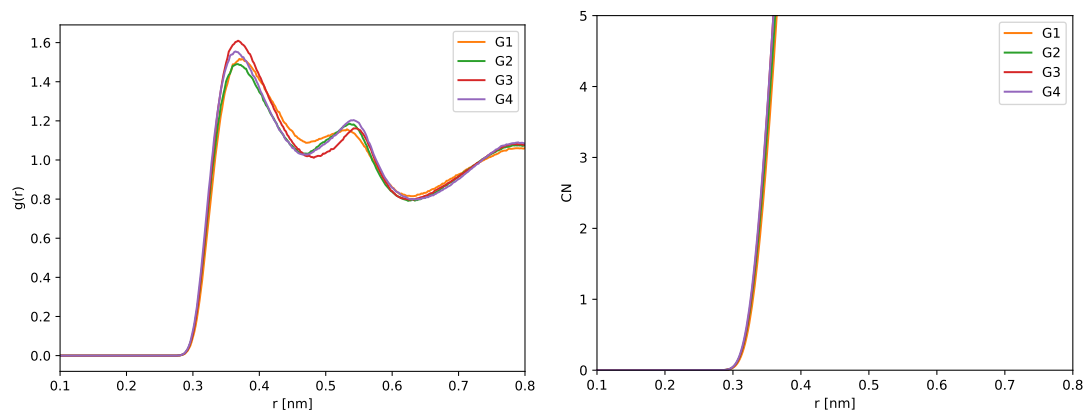

**I<sup>-</sup> – H-solvent 400mM 1,000 ppm**

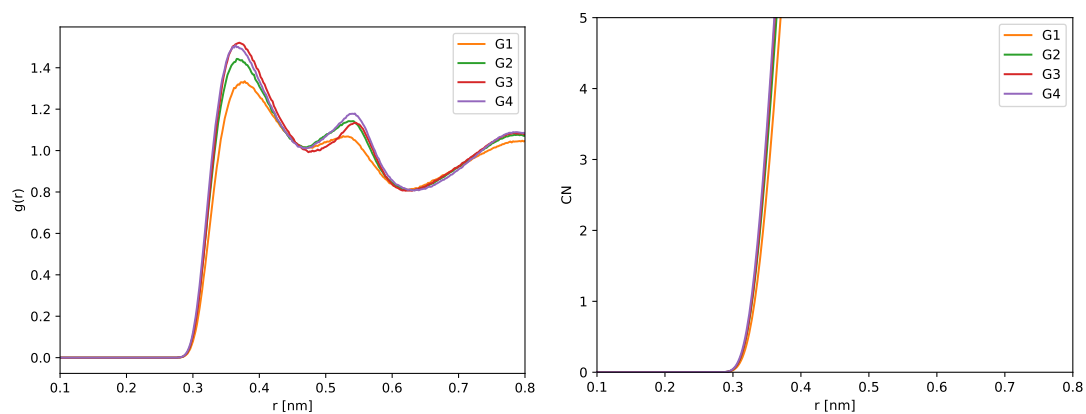

**I<sup>-</sup> – H-solvent 400mM 5,000 ppm**

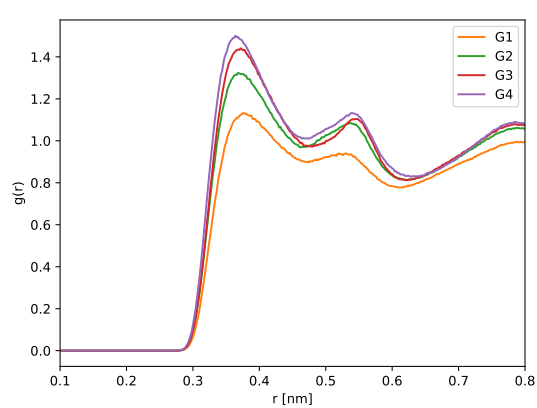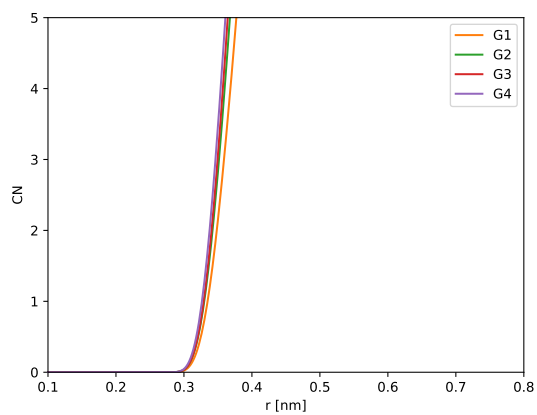

**I<sup>-</sup> – H-solvent 400mM 20,000 ppm**

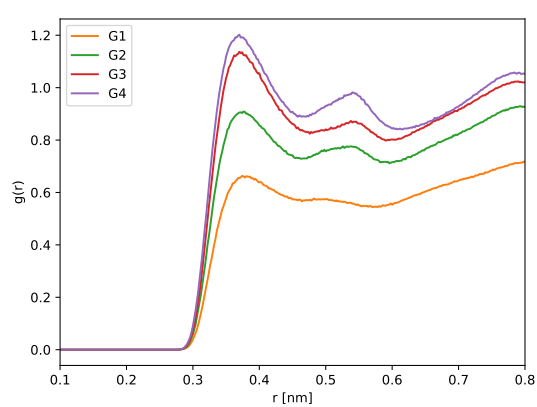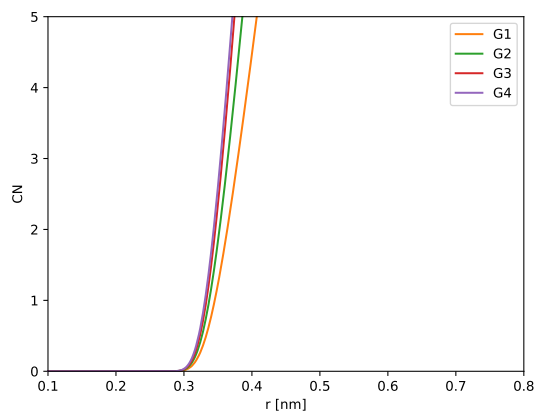



## 2.3 $I^- - I^-$

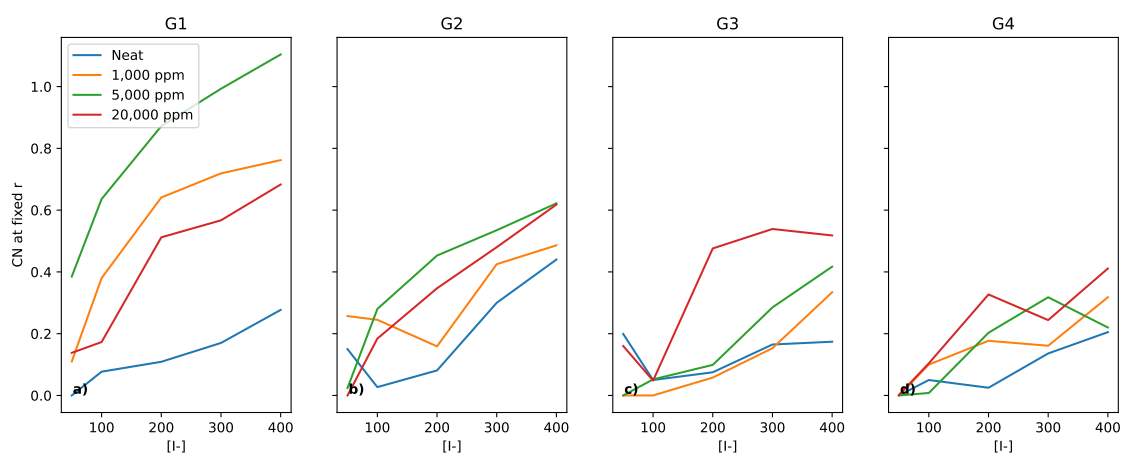

Figure 5: Coordination number of  $I^-$  to  $I^-$  at a fixed distance of  $5 \text{ \AA}$ , for the four different water containing systems (neat = blue, 1,000 ppm = yellow, 5,000 ppm = green and 20,000 ppm = red) studied here, across the four different solvents (with a): G1, b): G2, c): G3 and d): G4).

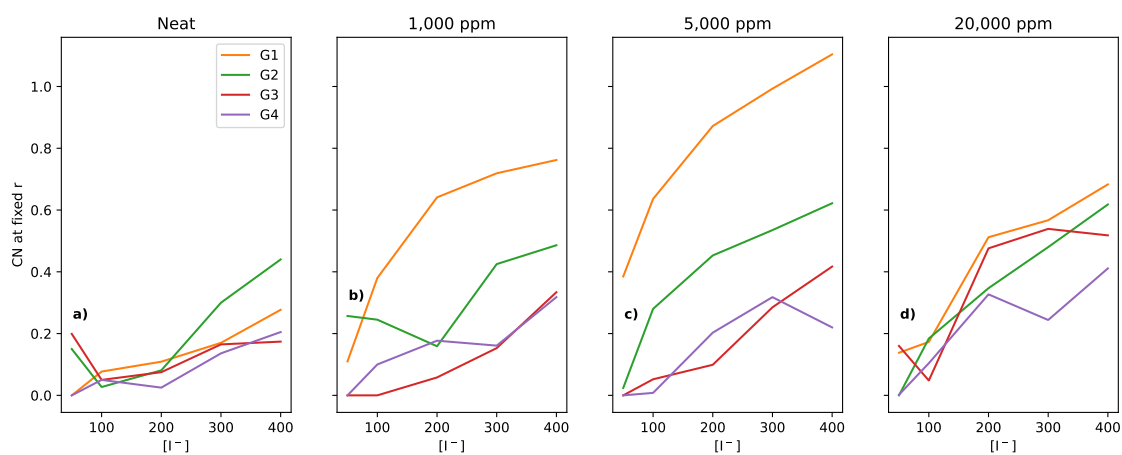

Figure 6: Coordination number of  $I^-$  to  $I^-$  at a fixed distance of  $5 \text{ \AA}$ , for the four different glymes (G1 = yellow, G2 = green, G3 = red, G4 = purple) studied here, across the four different water concentrations (with a): neat, b): 1,000, c): 5,000, d): 20,000 ppm of water).

**I<sup>-</sup> - I<sup>-</sup> 50mM neat**

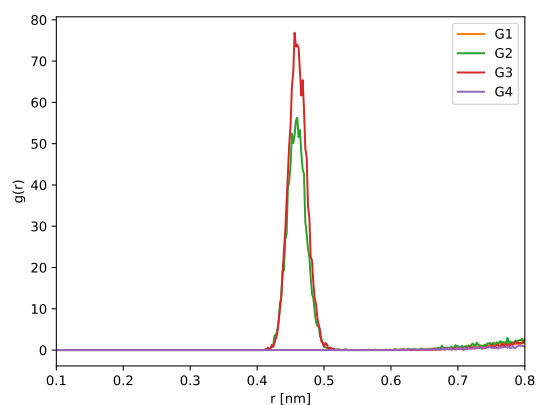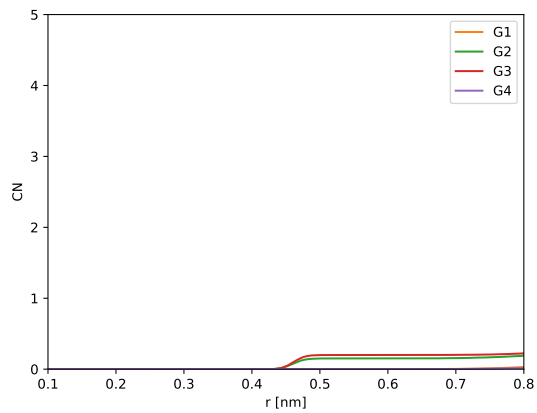

**I<sup>-</sup> - I<sup>-</sup> 50mM 1,000 ppm**

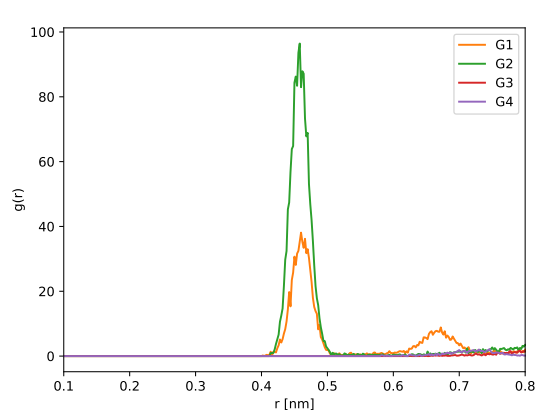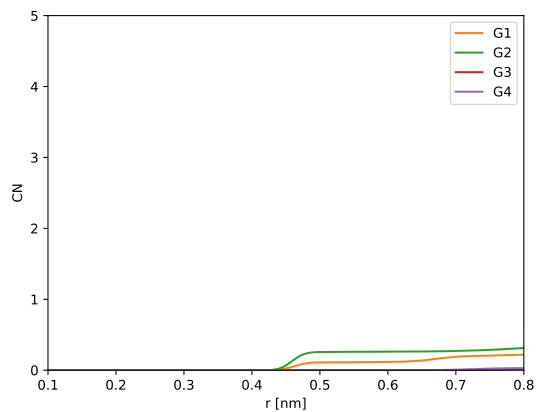

**I<sup>-</sup> - I<sup>-</sup> 50mM 5,000 ppm**

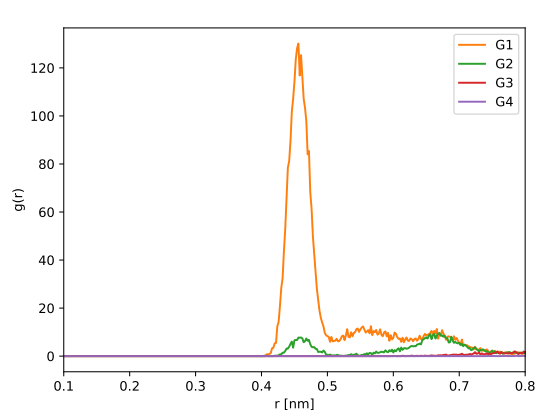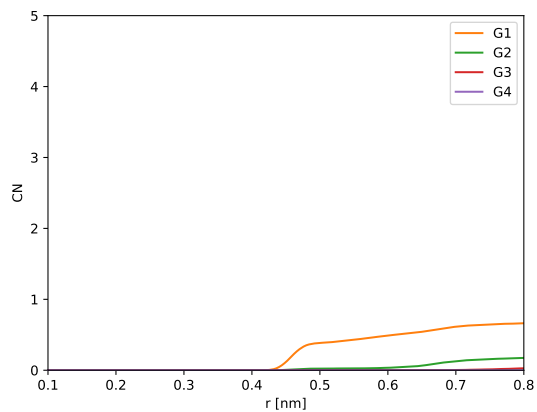

**I<sup>-</sup> - I<sup>-</sup> 50mM 20,000 ppm**

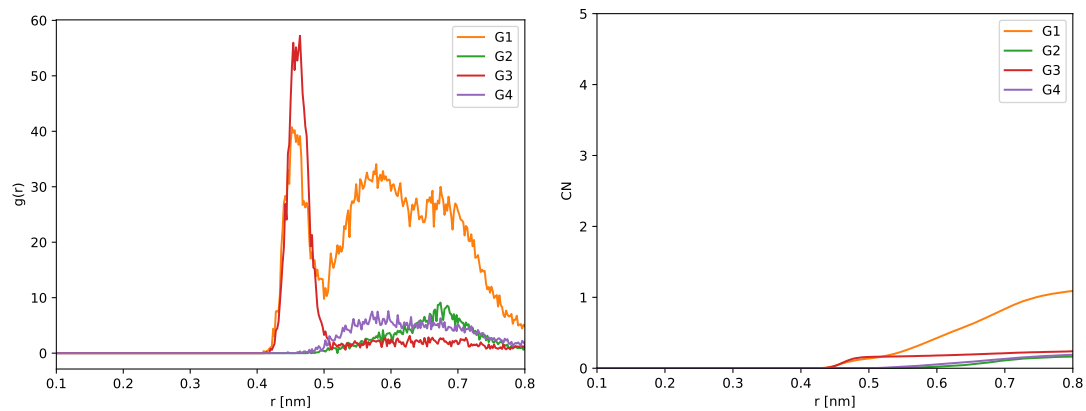

**I<sup>-</sup> - I<sup>-</sup> 100mM neat**

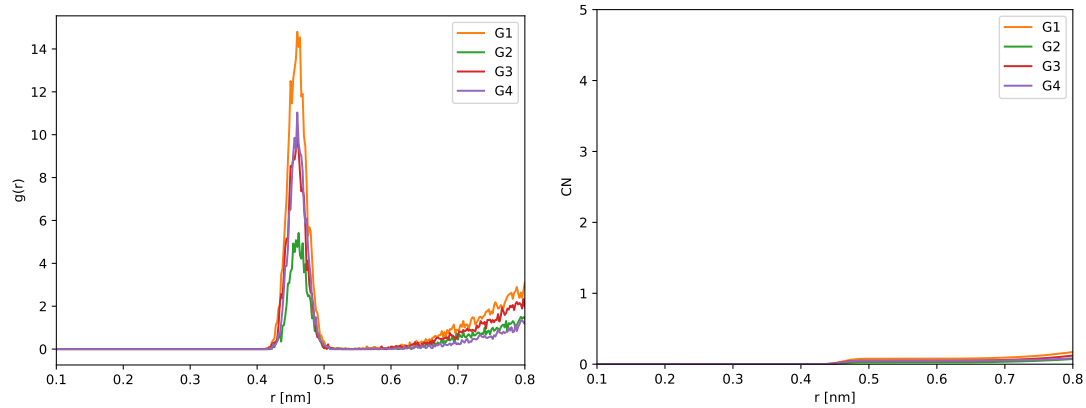

**I<sup>-</sup> - I<sup>-</sup> 100mM 1,000 ppm**

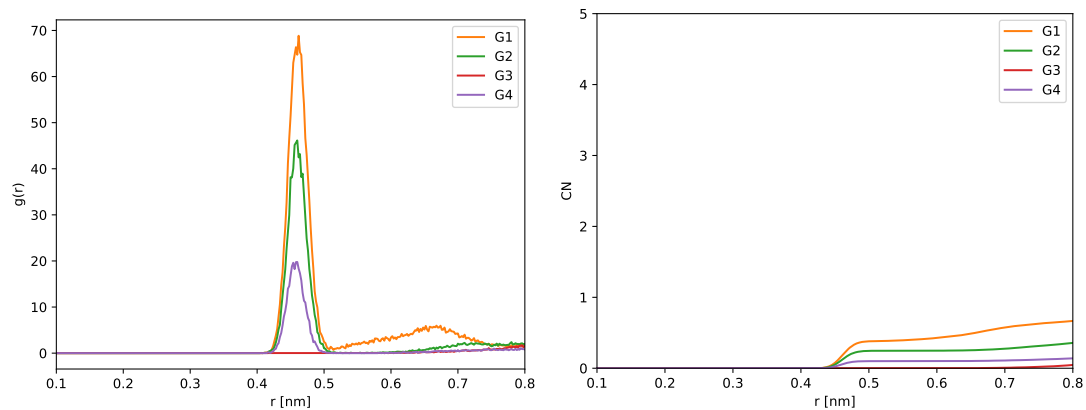

**I<sup>-</sup> - I<sup>-</sup> 100mM 5,000 ppm**

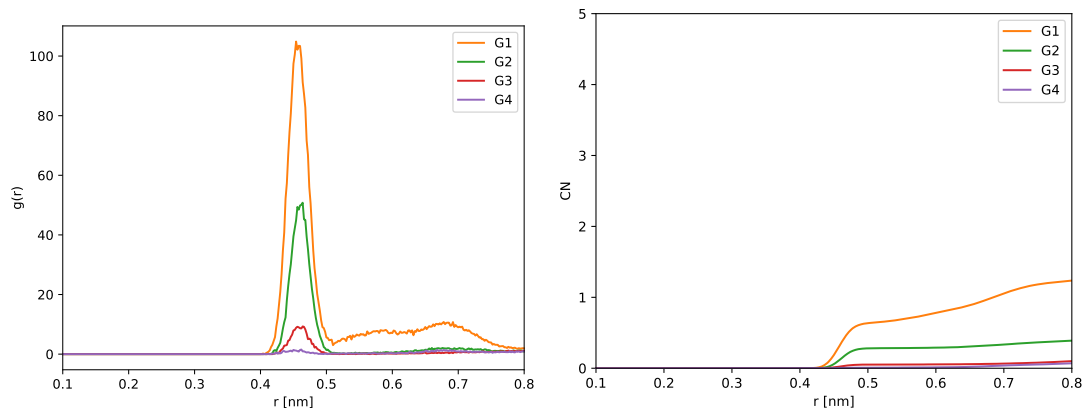

**I<sup>-</sup> - I<sup>-</sup> 100mM 20,000 ppm**

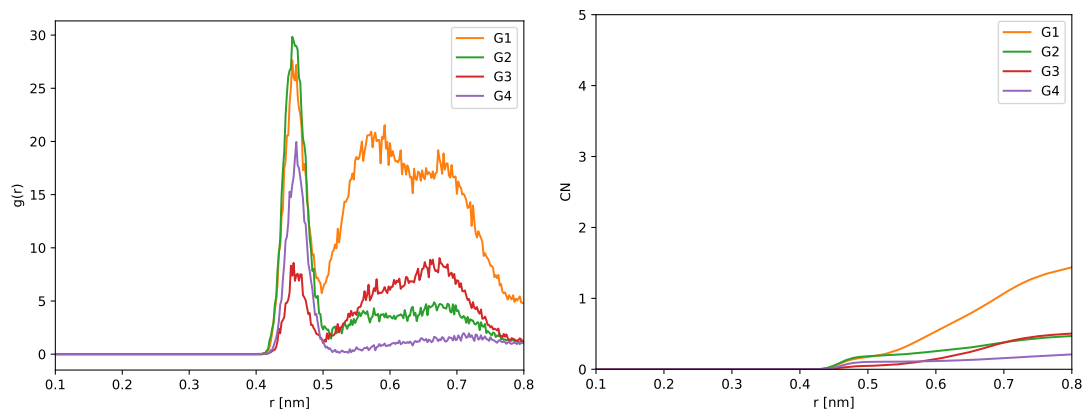

**I<sup>-</sup> - I<sup>-</sup> 200mM neat**

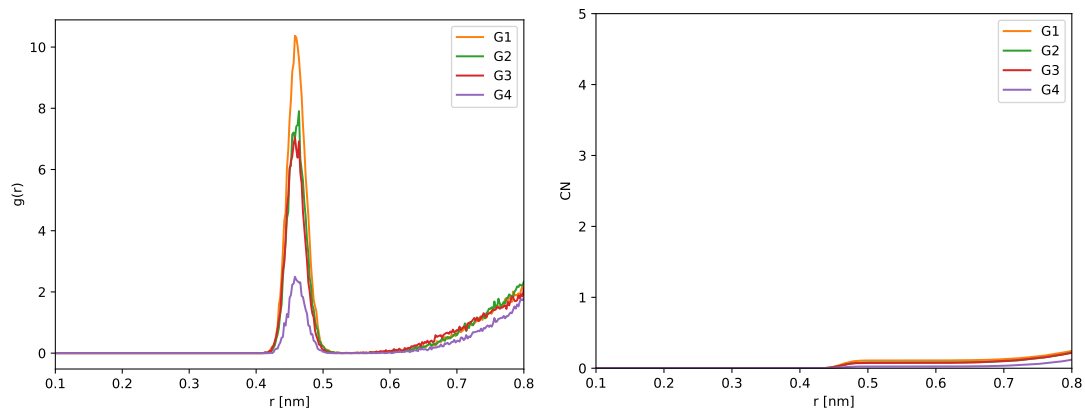

**I<sup>-</sup> - I<sup>-</sup> 200mM 1,000 ppm**

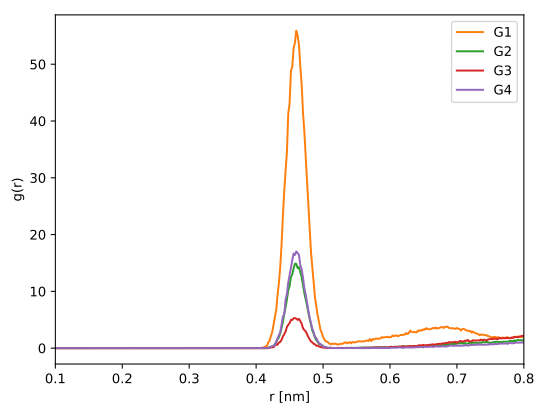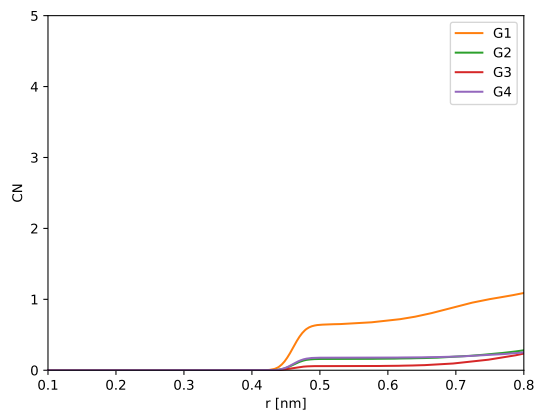

**I<sup>-</sup> - I<sup>-</sup> 200mM 5,000 ppm**

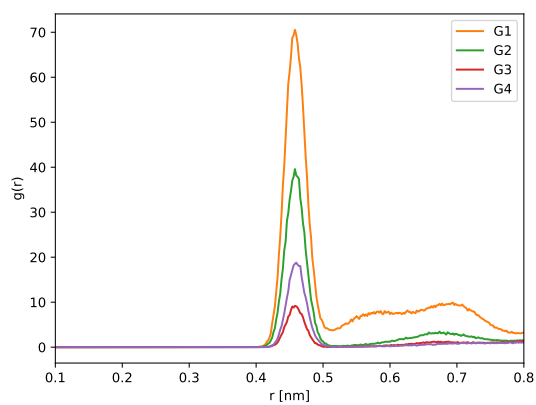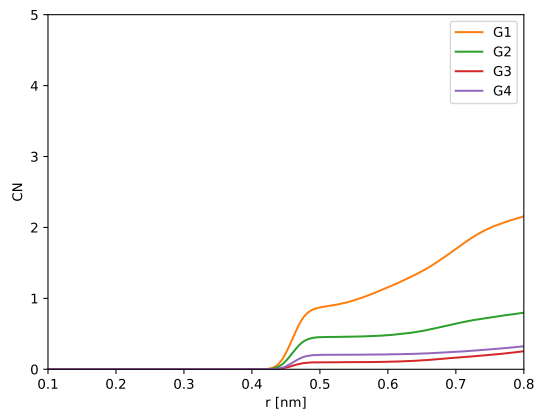

**I<sup>-</sup> - I<sup>-</sup> 200mM 20,000 ppm**

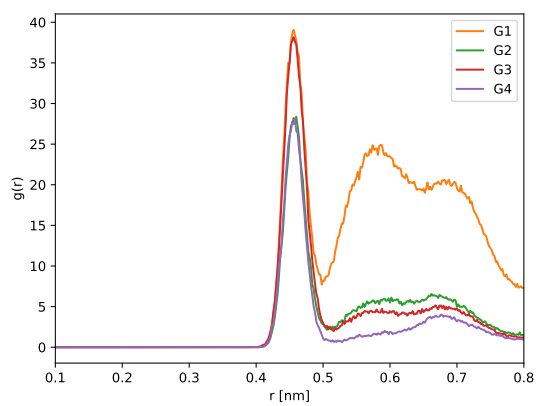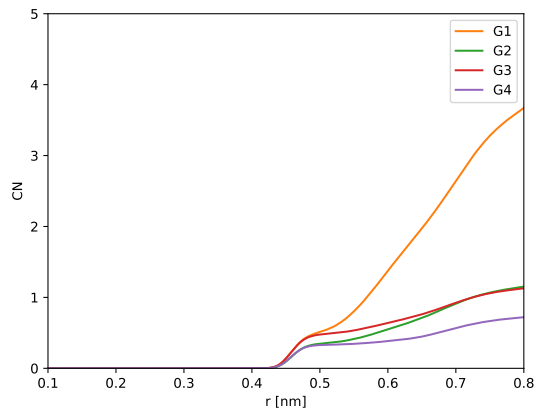

**I<sup>-</sup> - I<sup>-</sup> 300mM neat**

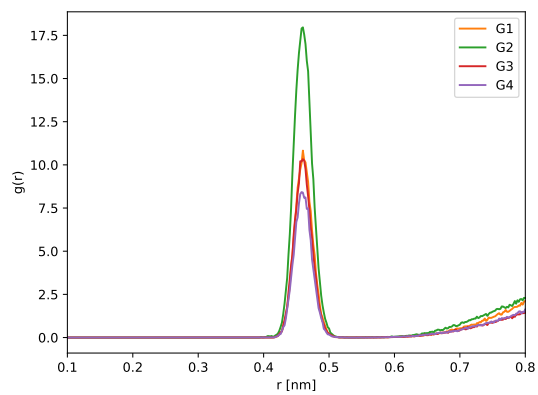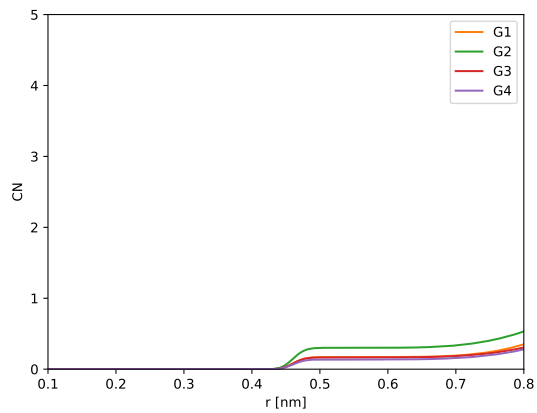

**I<sup>-</sup> - I<sup>-</sup> 300mM 1,000 ppm**

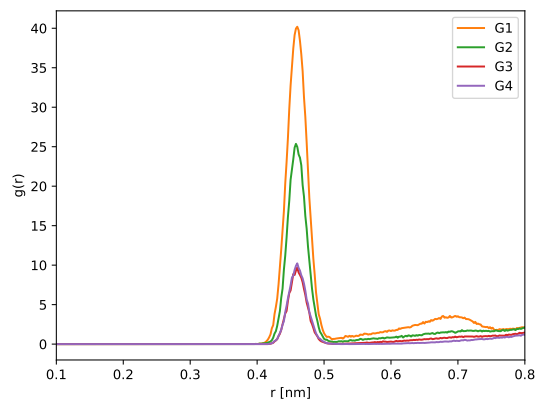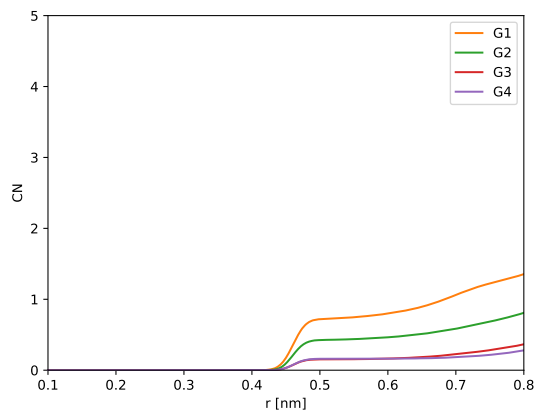

**I<sup>-</sup> - I<sup>-</sup> 300mM 5,000 ppm**

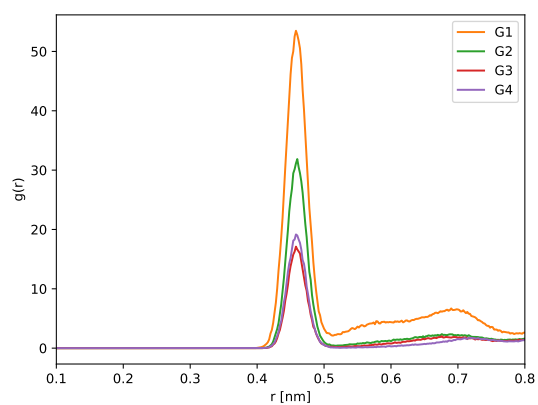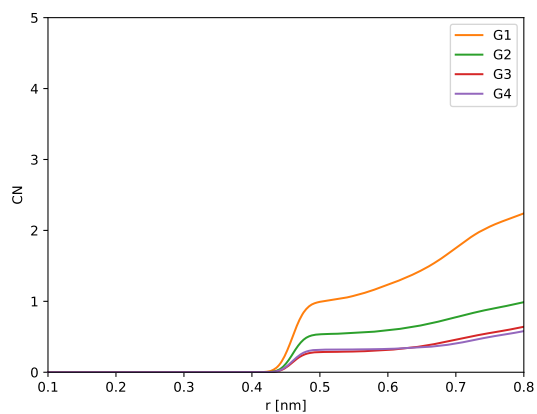

**I<sup>-</sup> - I<sup>-</sup> 300mM 20,000 ppm**

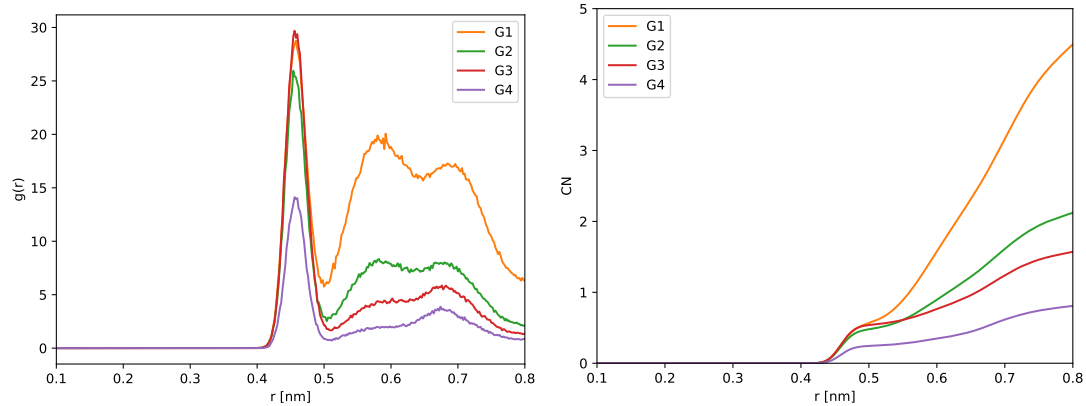

**I<sup>-</sup> - I<sup>-</sup> 400mM neat**

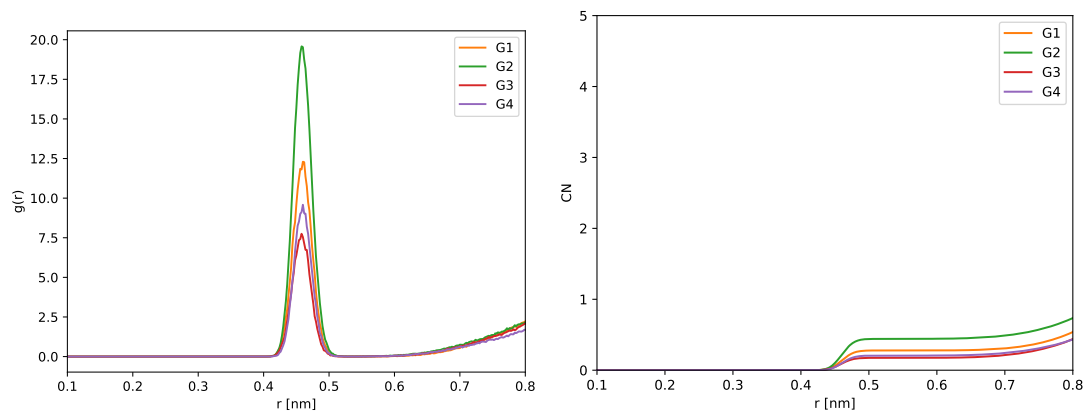

**I<sup>-</sup> - I<sup>-</sup> 400mM 1,000 ppm**

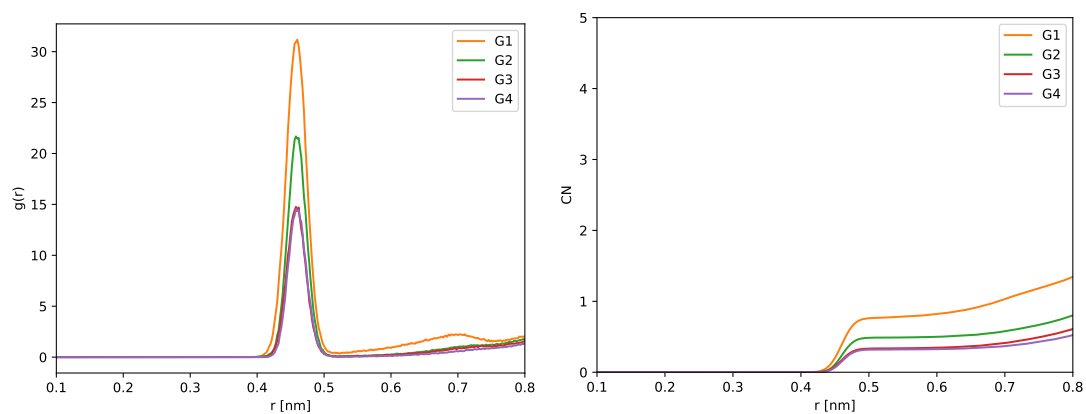

**I<sup>-</sup> - I<sup>-</sup> 400mM 5,000 ppm**

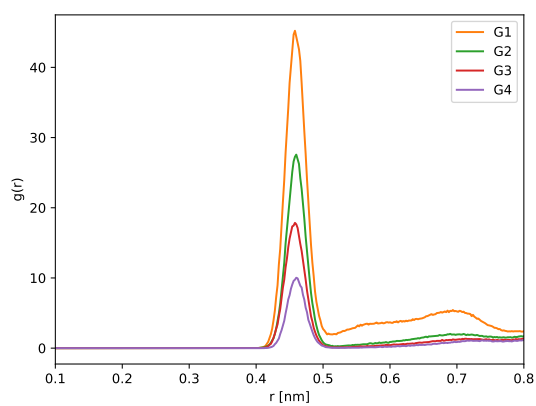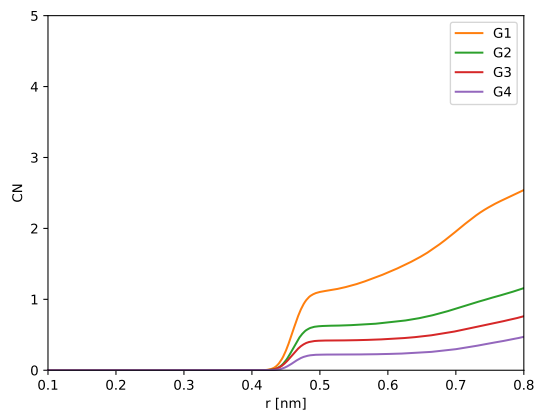

**I<sup>-</sup> - I<sup>-</sup> 400mM 20,000 ppm**

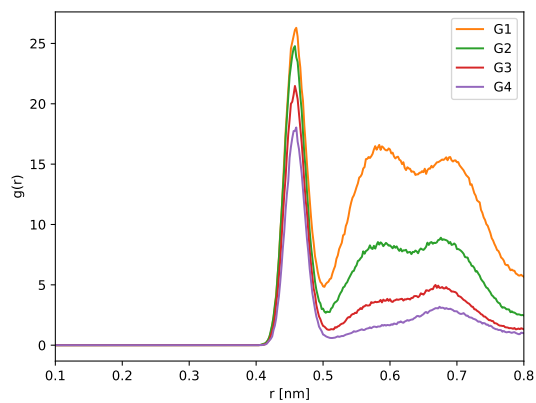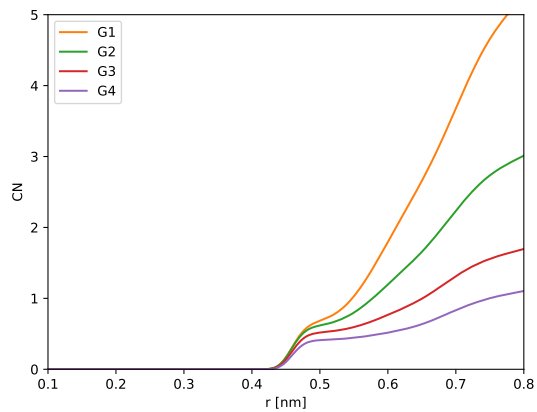



## 2.4 I<sup>-</sup> – O-solvent

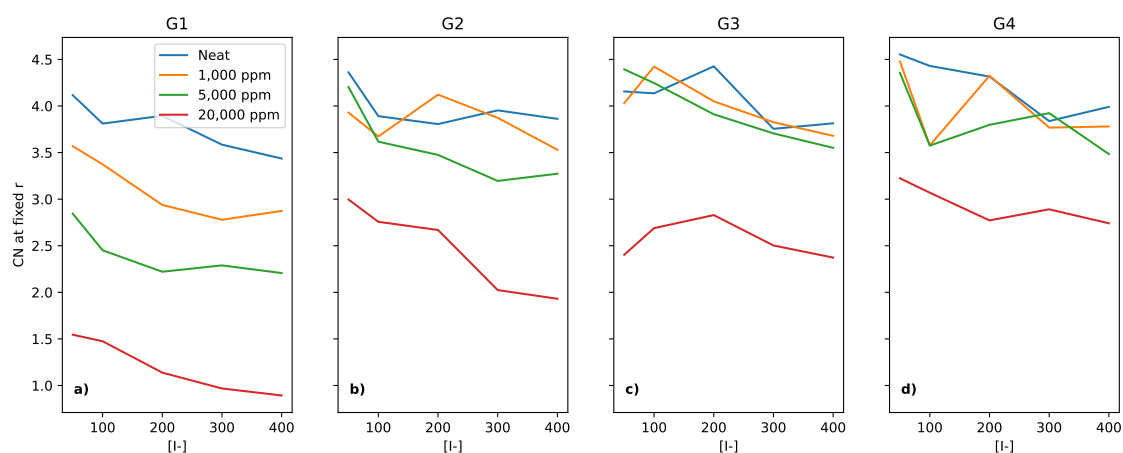

Figure 7: Coordination number of I<sup>-</sup> to O (of the glyme solvent) at a fixed distance of 5 Å, for the four different water containing systems (neat = blue, 1,000 ppm = yellow, 5,000 ppm = green and 20,000 ppm = red) studied here, across the four different solvents (with a): G1, b): G2, c): G3 and d): G4).

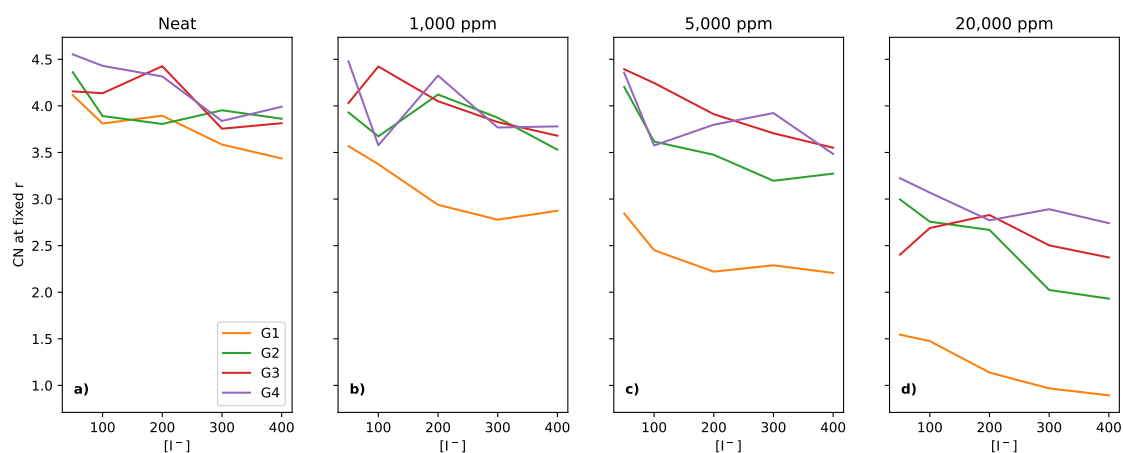

Figure 8: Coordination number of I<sup>-</sup> to O (of the glyme solvent) at a fixed distance of 5 Å, for the four different glymes (G1 = yellow, G2 = green, G3 = red, G4 = purple) studied here, across the four different water concentrations (with a): neat, b): 1,000, c): 5,000, d): 20,000 ppm of water).

**I<sup>-</sup> – O-solvent 50mM neat**

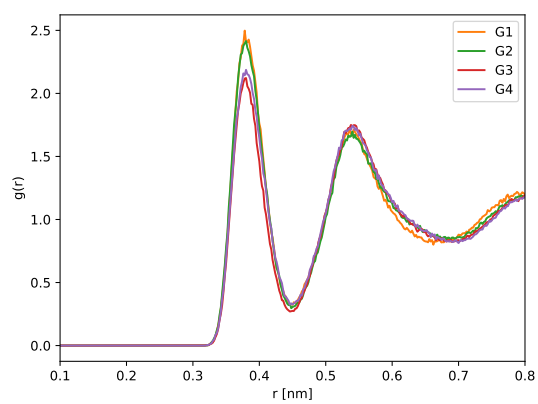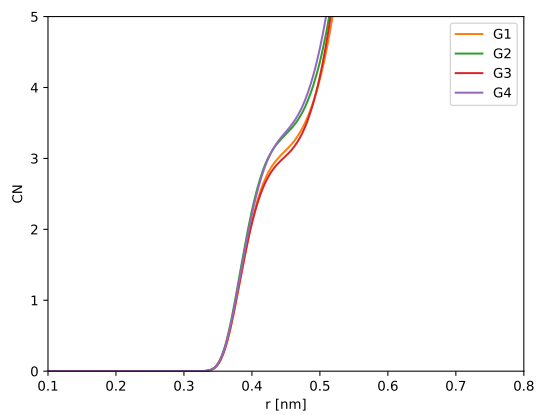

**I<sup>-</sup> – O-solvent 50mM 1,000 ppm**

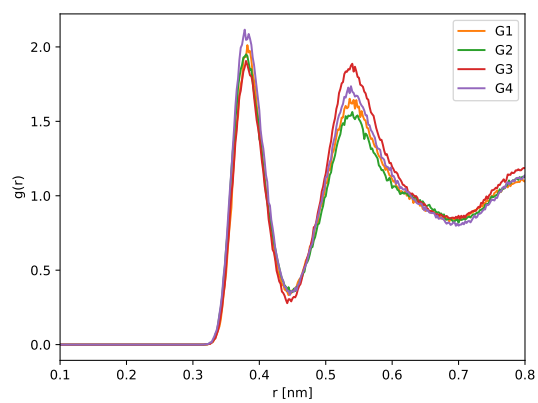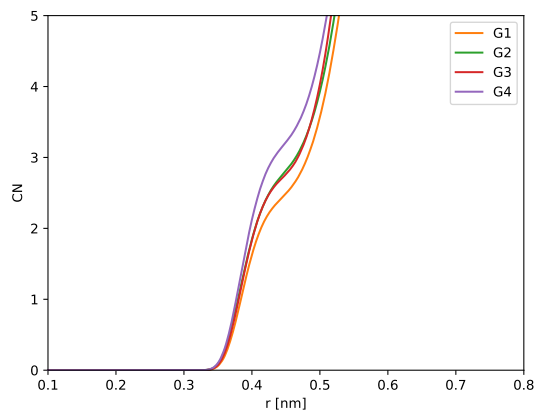

**I<sup>-</sup> – O-solvent 50mM 5,000 ppm**

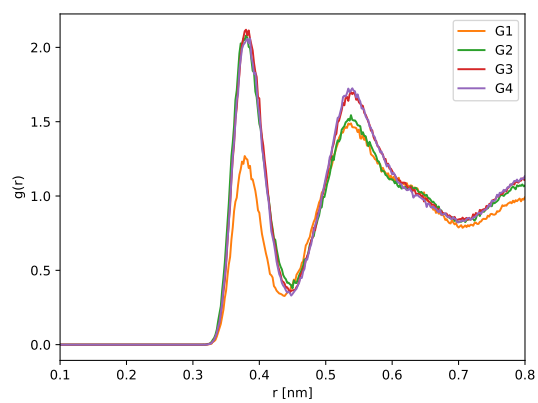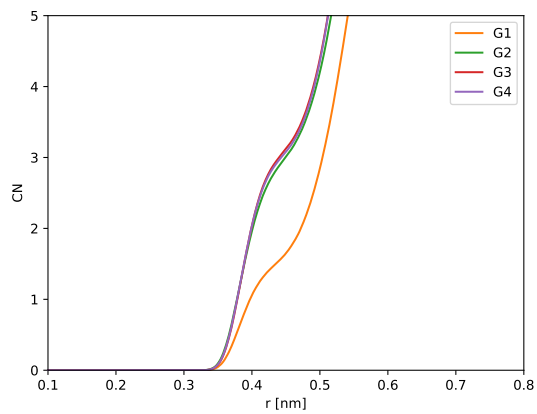

**I<sup>-</sup> – O-solvent 50mM 20,000 ppm**

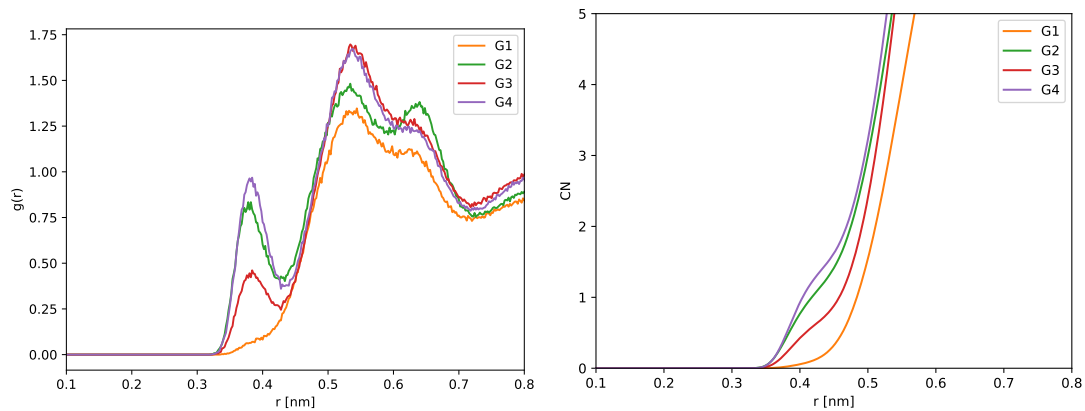

**I<sup>-</sup> – O-solvent 100mM neat**

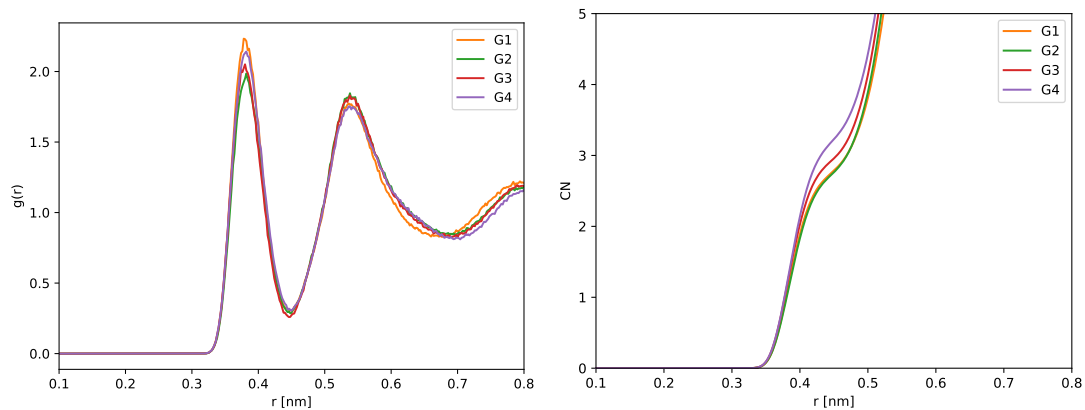

**I<sup>-</sup> – O-solvent 100mM 1,000 ppm**

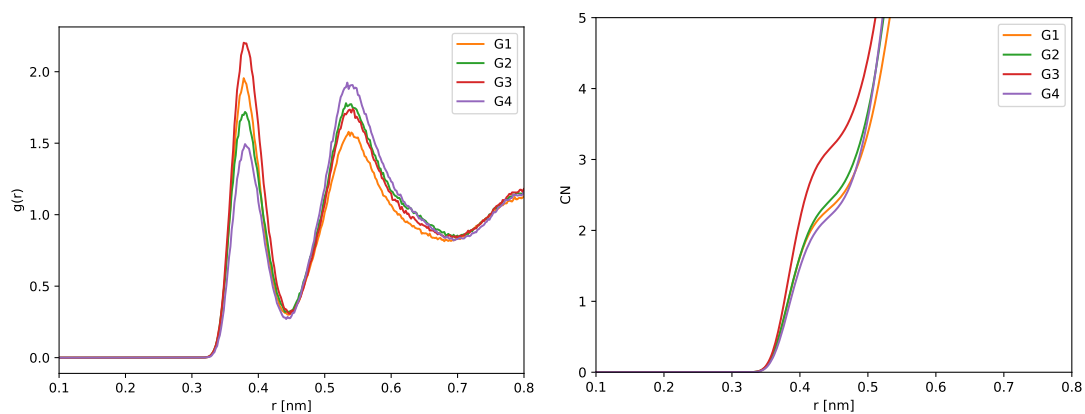

**I<sup>-</sup> – O-solvent 100mM 5,000 ppm**

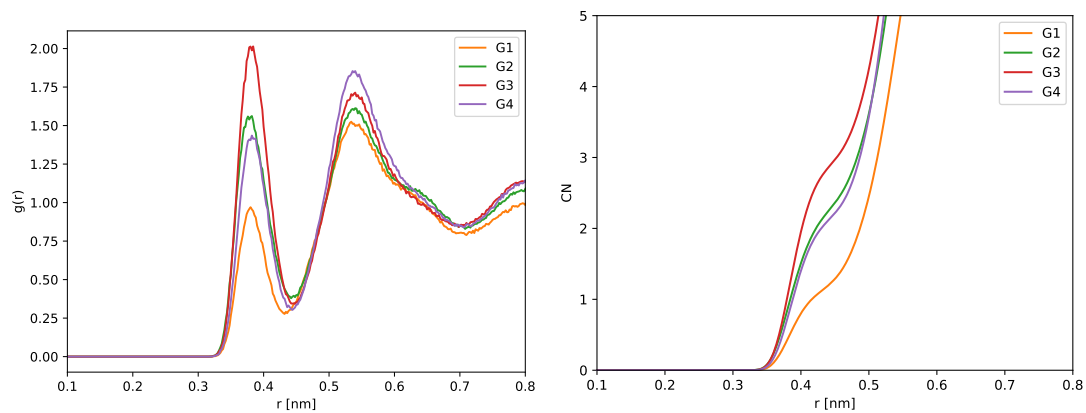

**I<sup>-</sup> – O-solvent 100mM 20,000 ppm**

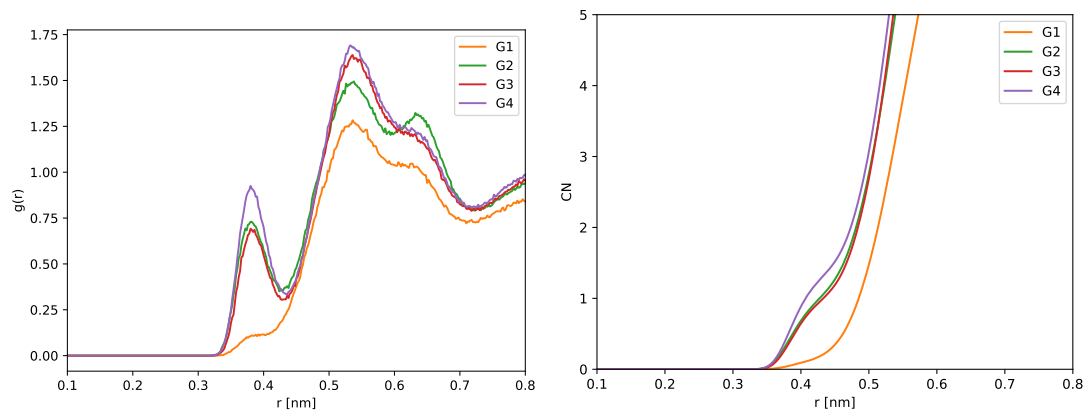

**I<sup>-</sup> – O-solvent 200mM neat**

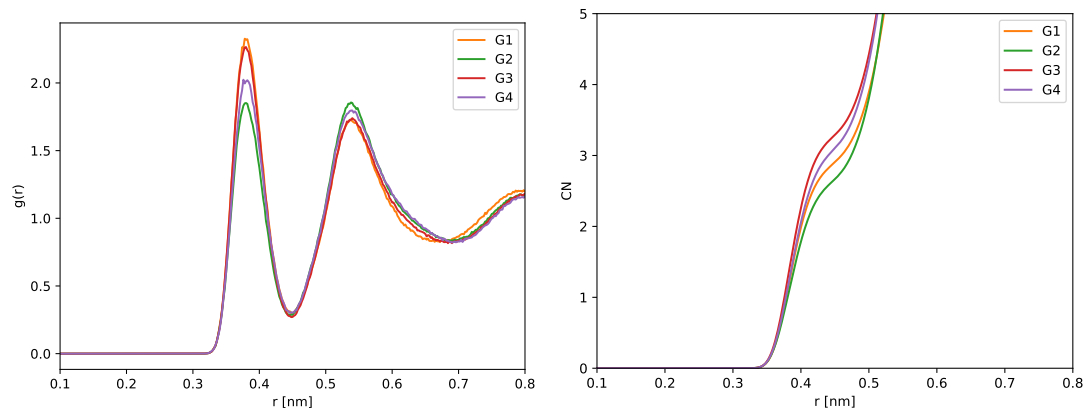

**I<sup>-</sup> – O-solvent 200mM 1,000 ppm**

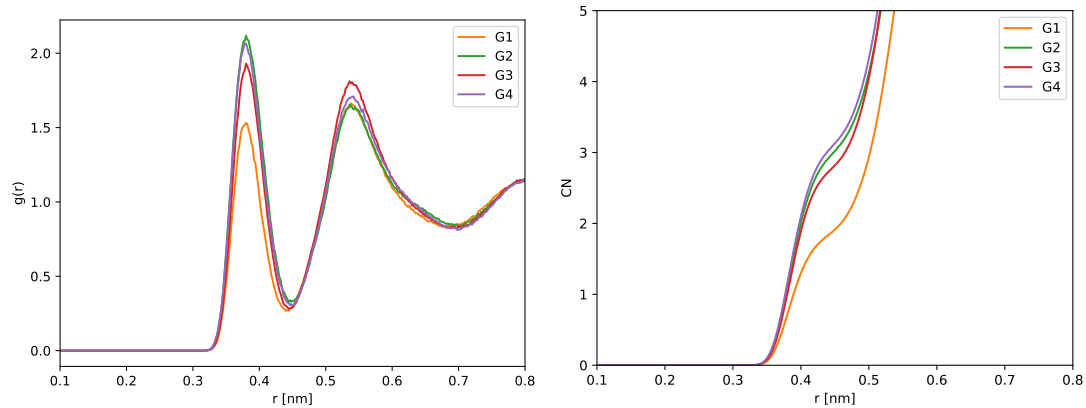

**I<sup>-</sup> – O-solvent 200mM 5,000 ppm**

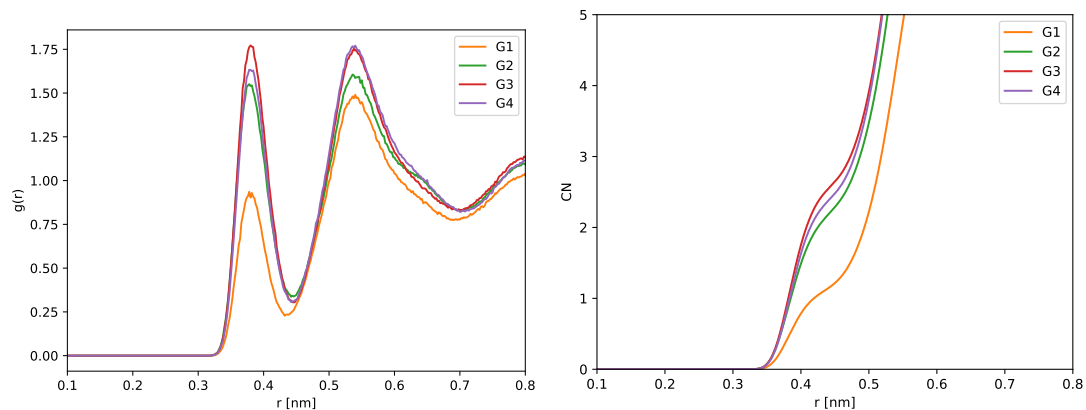

**I<sup>-</sup> – O-solvent 200mM 20,000 ppm**

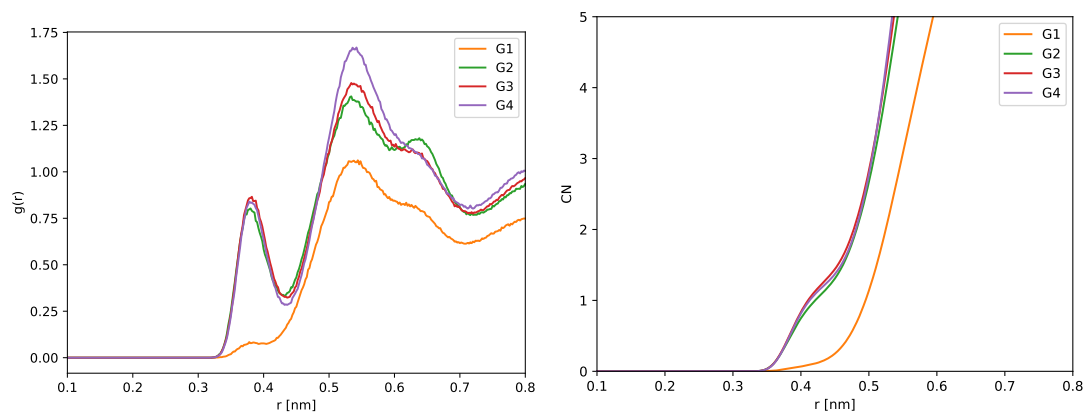

**I<sup>-</sup> – O-solvent 300mM neat**

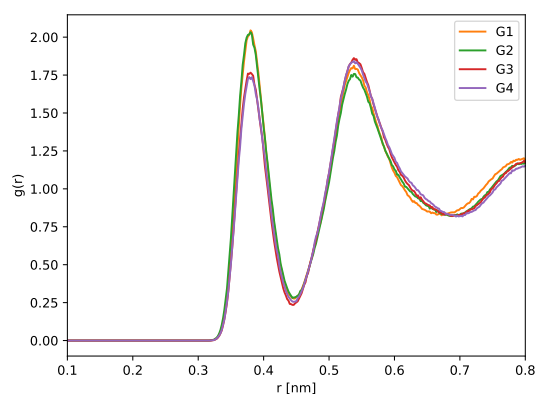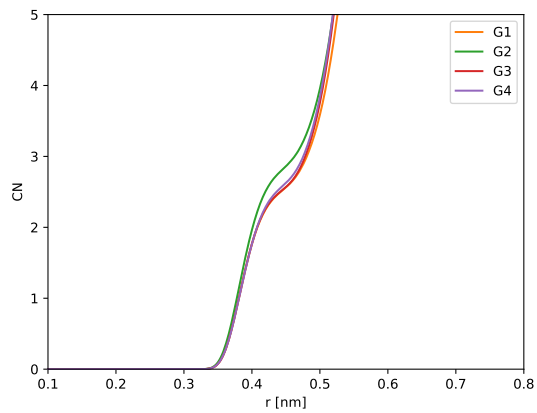

**I<sup>-</sup> – O-solvent 300mM 1,000 ppm**

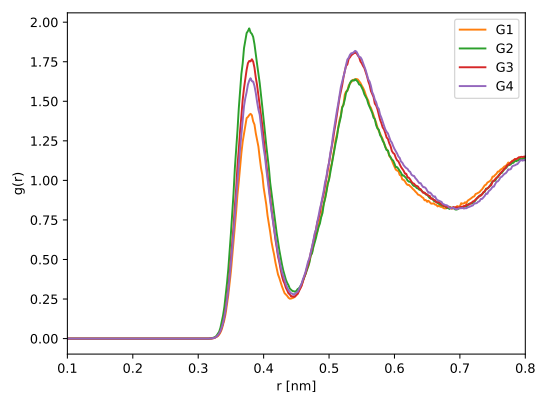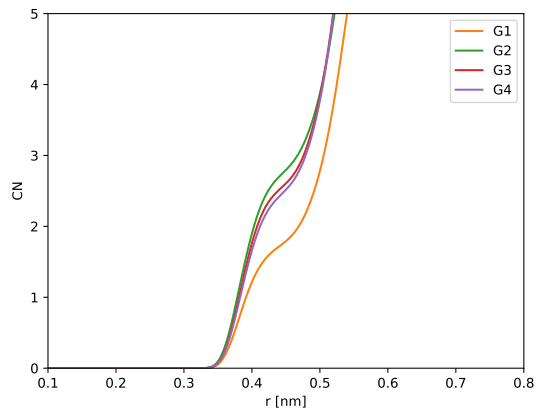

**I<sup>-</sup> – O-solvent 300mM 5,000 ppm**

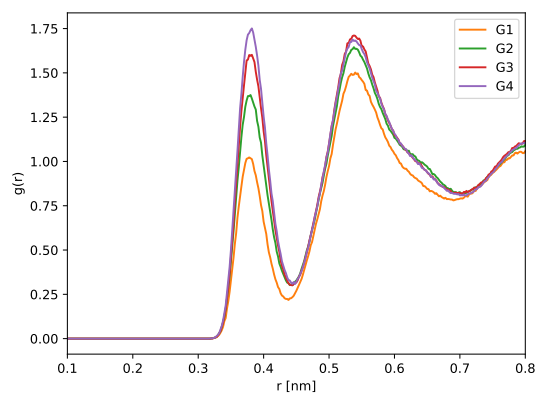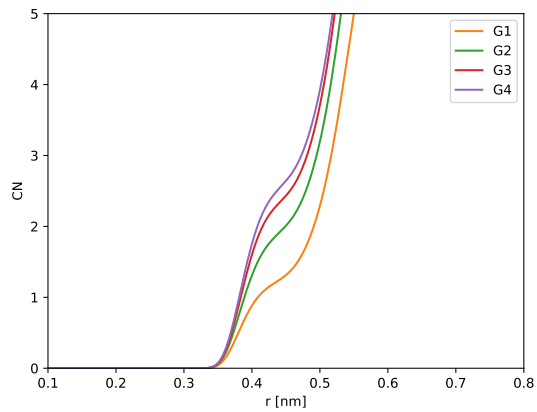

**I<sup>-</sup> – O-solvent 300mM 20,000 ppm**

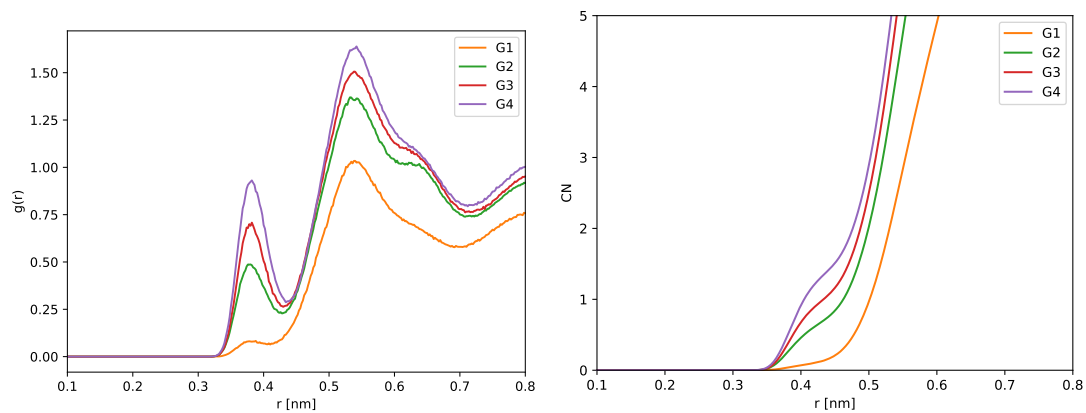

**I<sup>-</sup> – O-solvent 400mM neat**

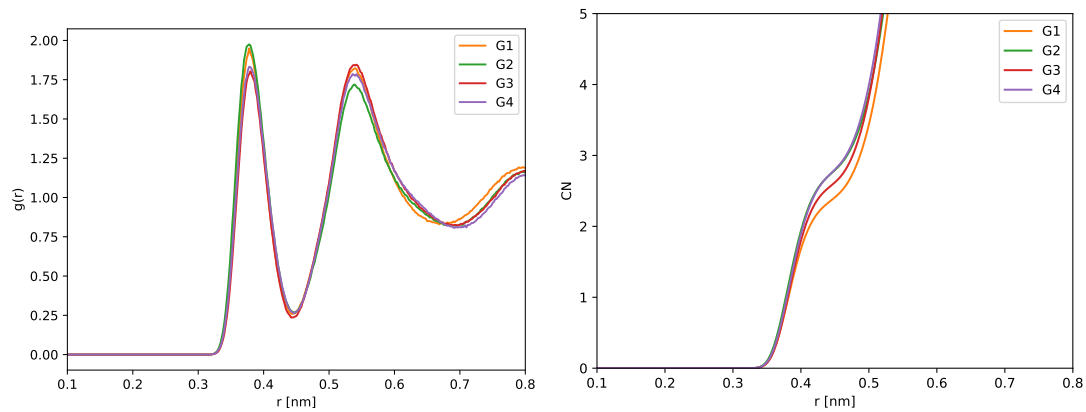

**I<sup>-</sup> – O-solvent 400mM 1,000 ppm**

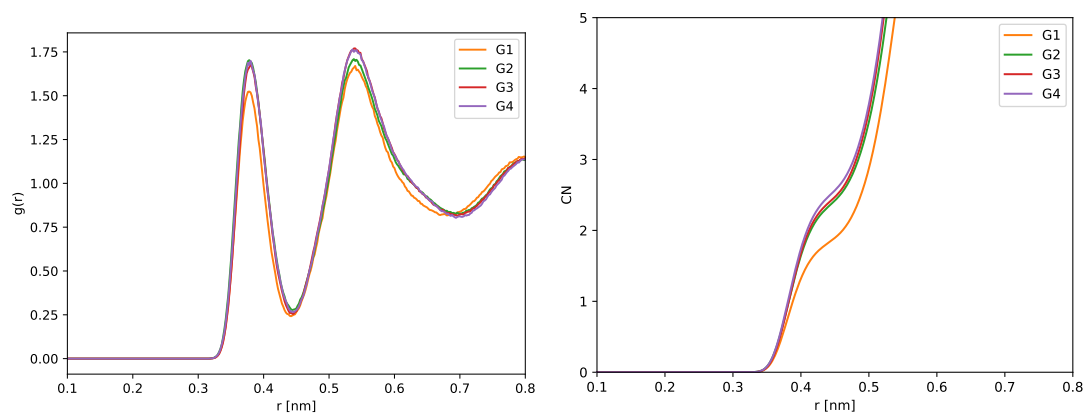

**I<sup>-</sup> – O-solvent 400mM 5,000 ppm**

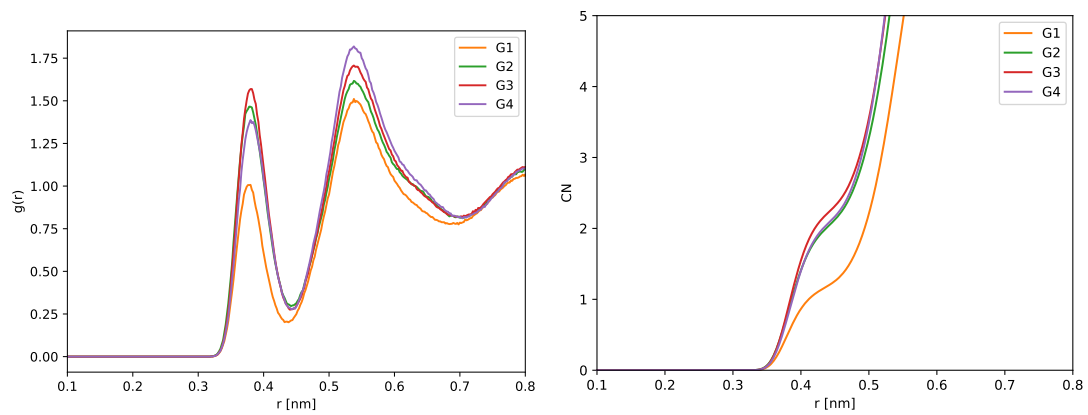

**I<sup>-</sup> – O-solvent 400mM 20,000 ppm**

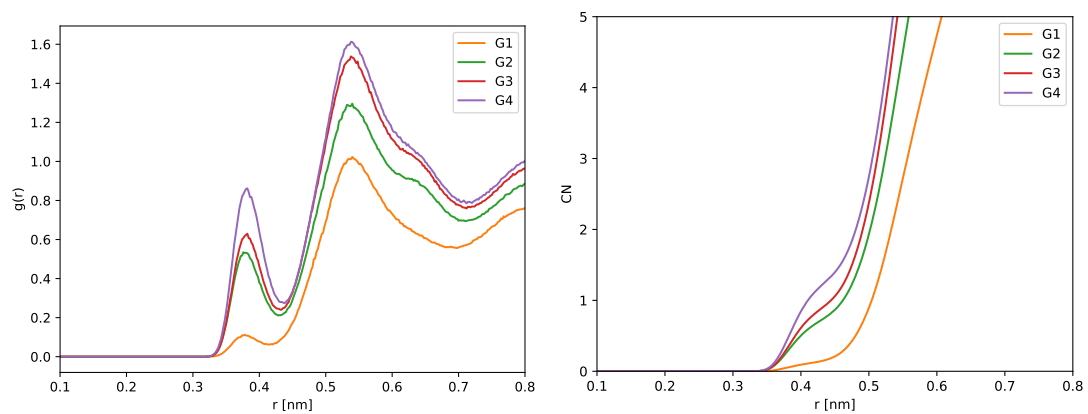



## 2.5 I<sup>-</sup> – N-TFSI

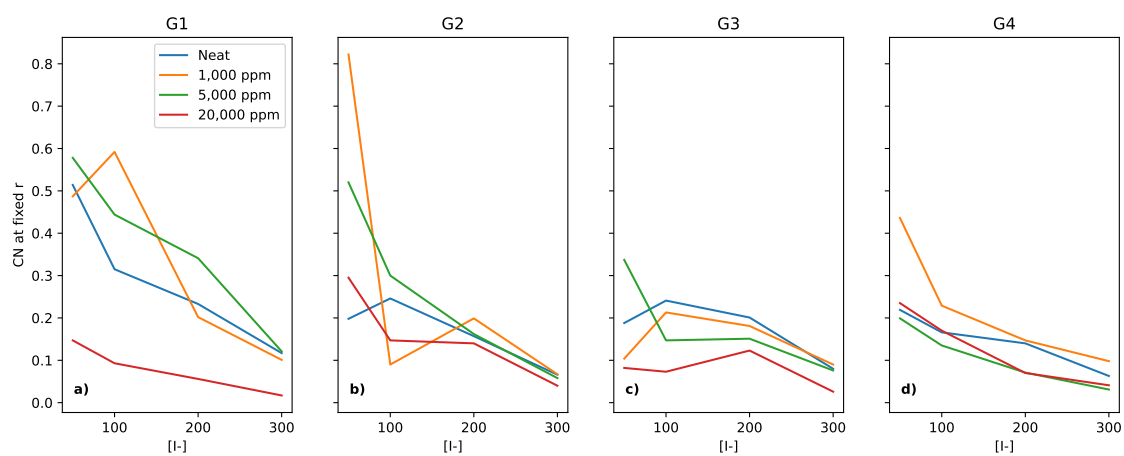

Figure 9: Coordination number of I<sup>-</sup> to N (of the TFSI) at a fixed distance of 4.5 Å, for the four different water containing systems (neat = blue, 1,000 ppm = yellow, 5,000 ppm = green and 20,000 ppm = red) studied here, across the four different solvents (with a): G1, b): G2, c): G3 and d): G4).

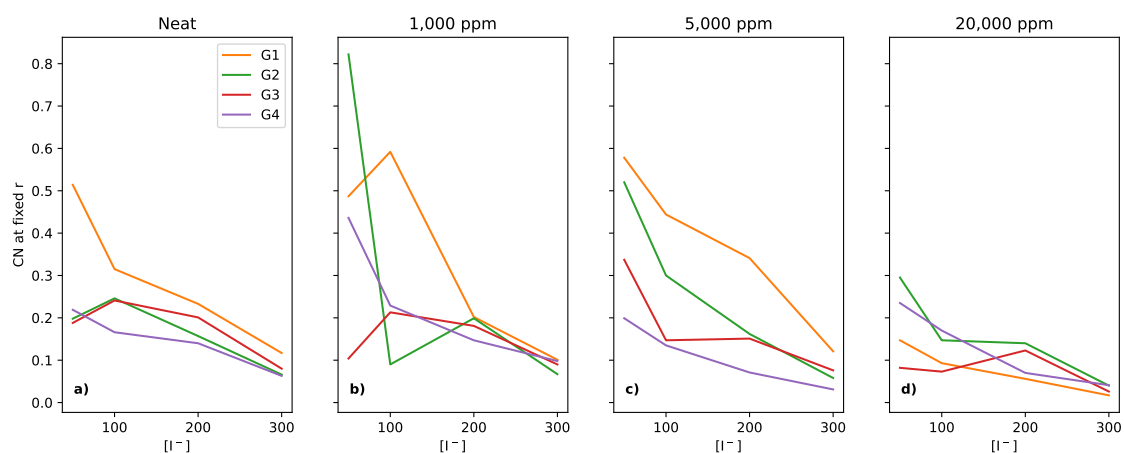

Figure 10: Coordination number of I<sup>-</sup> to N (of the TFSI) at a fixed distance of 4.5 Å, for the four different glymes (G1 = yellow, G2 = green, G3 = red, G4 = purple) studied here, across the four different water concentrations (with a): neat, b): 1,000, c): 5,000, d): 20,000 ppm of water).

**I<sup>-</sup> – N-TFSI 50mM neat**

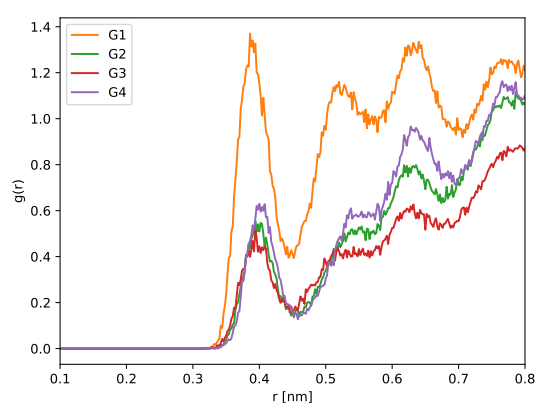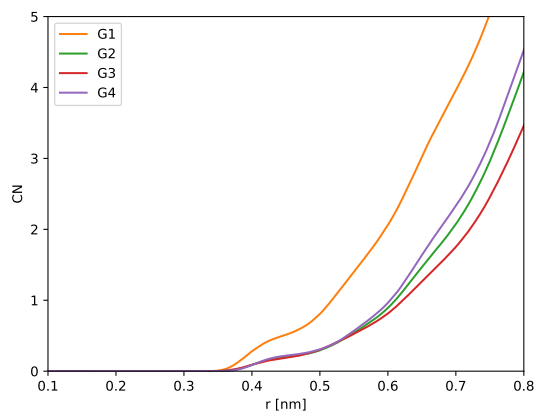

**I<sup>-</sup> – N-TFSI 50mM 1,000 ppm**

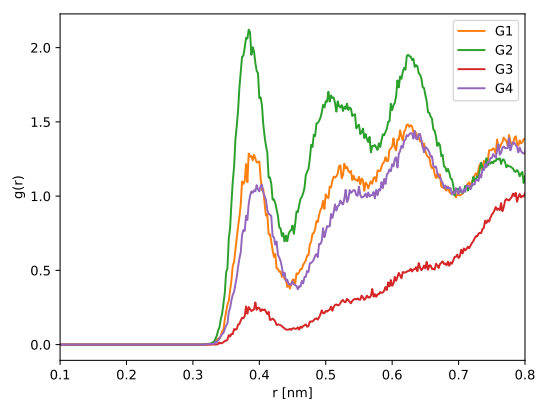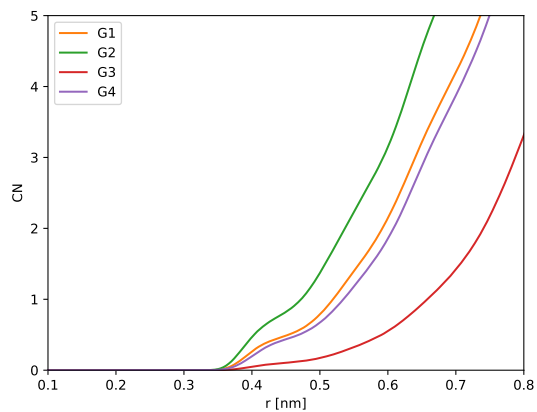

**I<sup>-</sup> – N-TFSI 50mM 5,000 ppm**

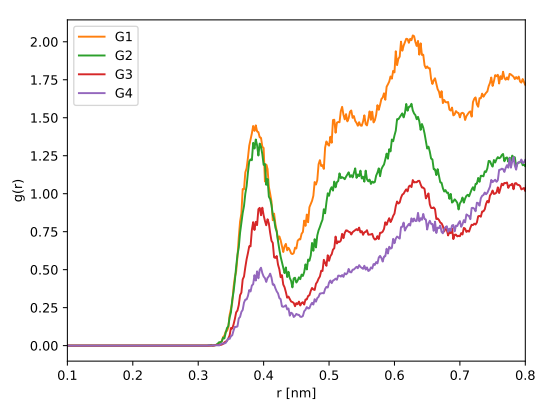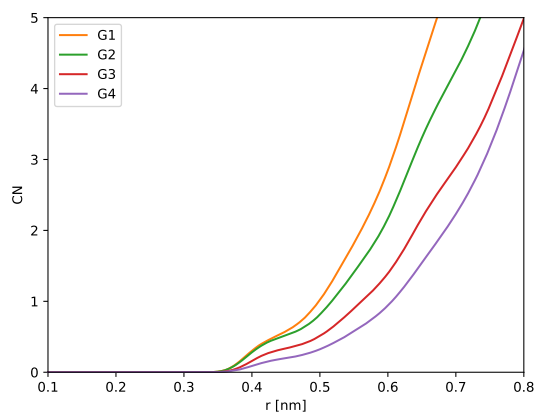

**I<sup>-</sup> – N-TFSI 50mM 20,000 ppm**

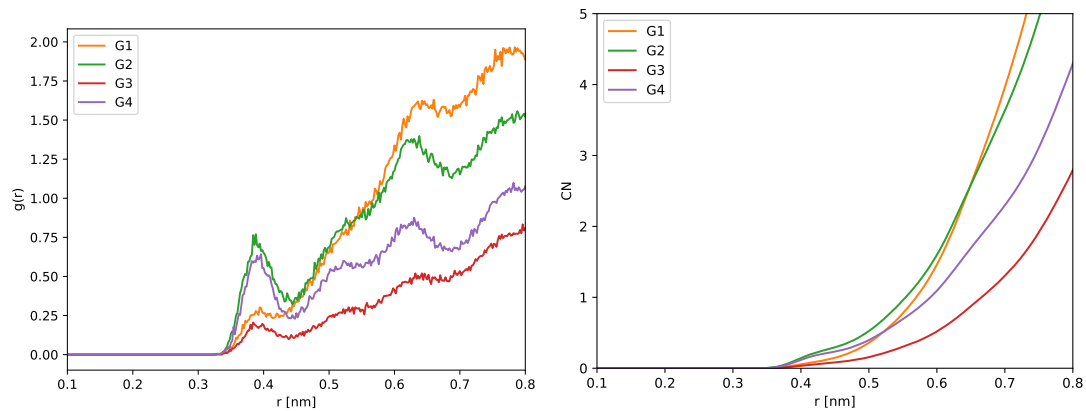

**I<sup>-</sup> – N-TFSI 100mM neat**

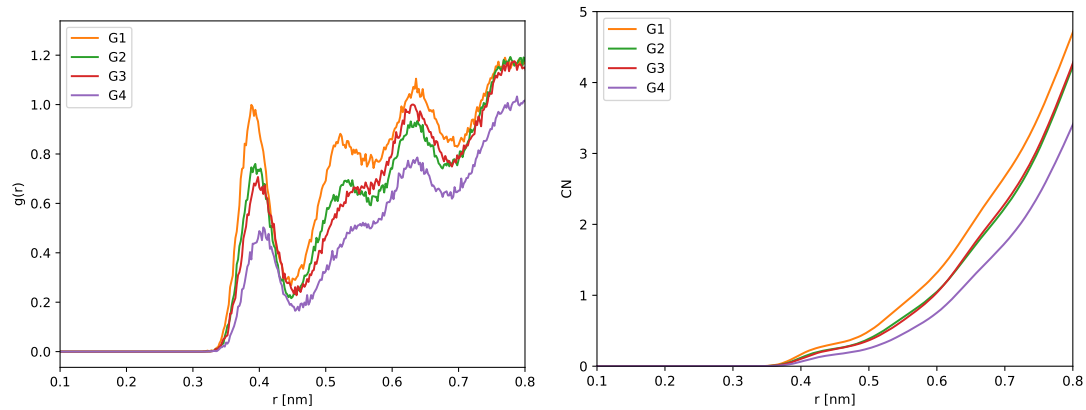

**I<sup>-</sup> – N-TFSI 100mM 1,000 ppm**

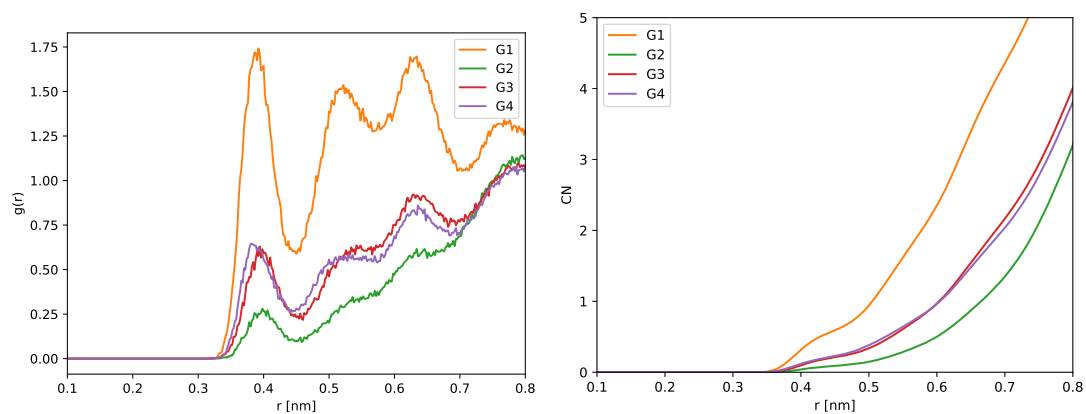

**I<sup>-</sup> – N-TFSI 100mM 5,000 ppm**

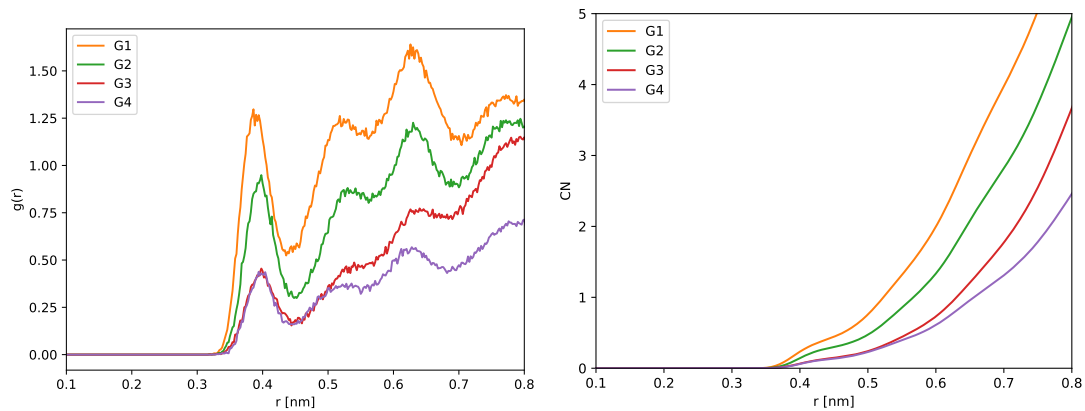

**I<sup>-</sup> – N-TFSI 100mM 20,000 ppm**

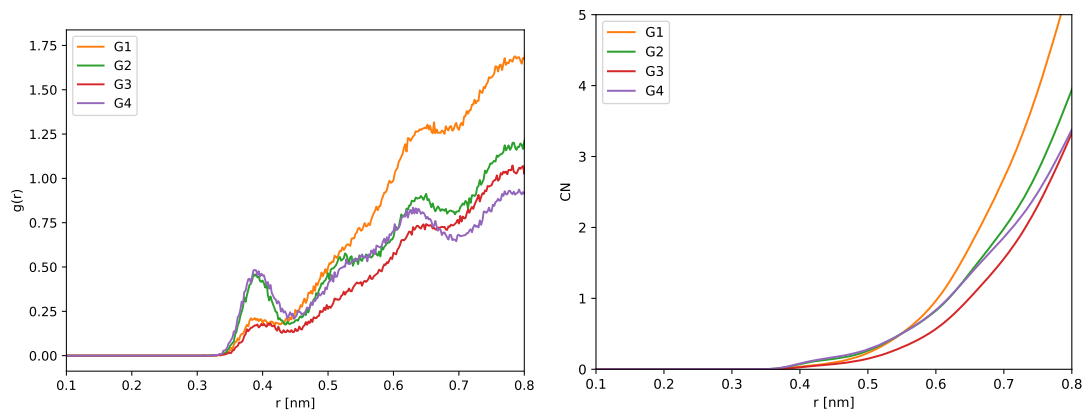

**I<sup>-</sup> – N-TFSI 200mM neat**

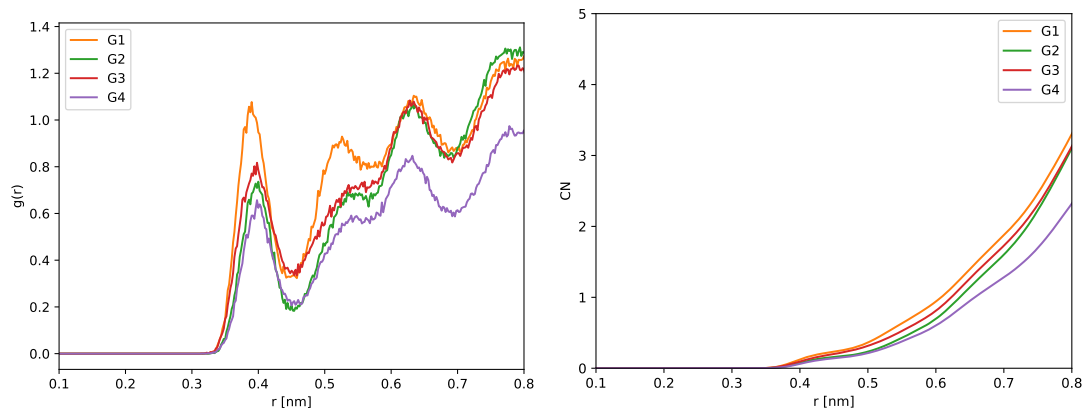

**I<sup>-</sup> – N-TFSI 200mM 1,000 ppm**

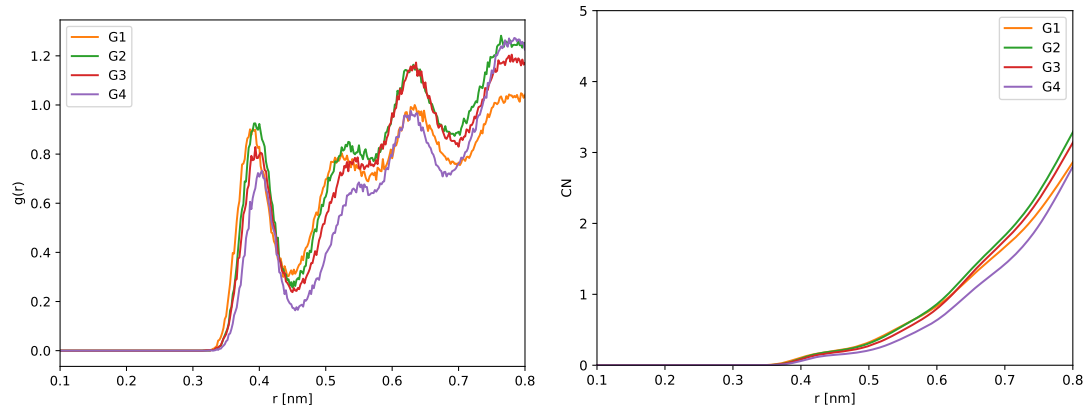

**I<sup>-</sup> – N-TFSI 200mM 5,000 ppm**

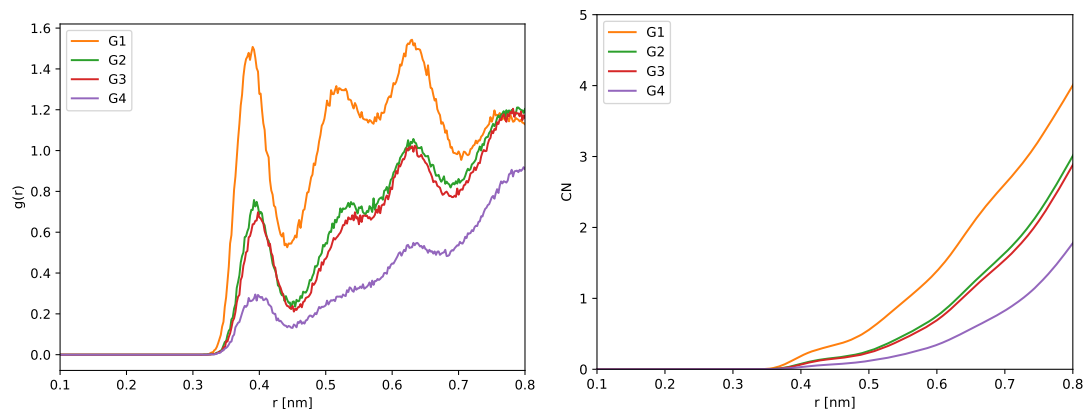

**I<sup>-</sup> – N-TFSI 200mM 20,000 ppm**

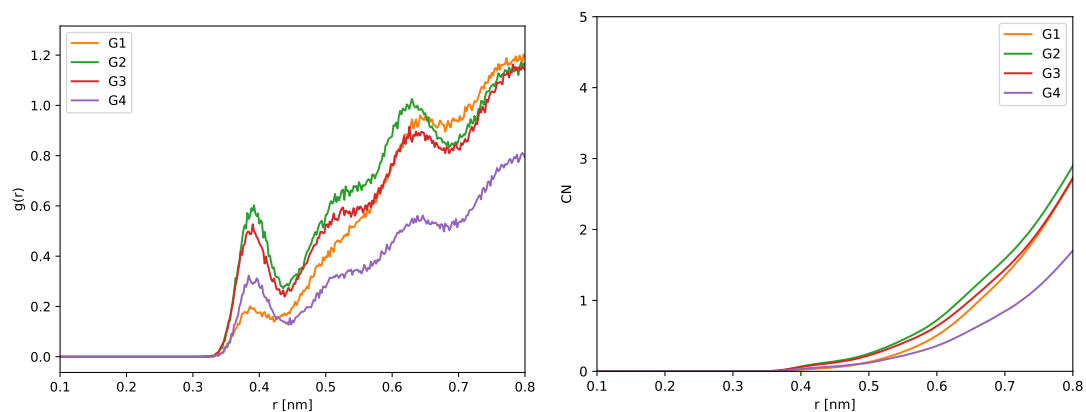

**I<sup>-</sup> – N-TFSI 300mM neat**

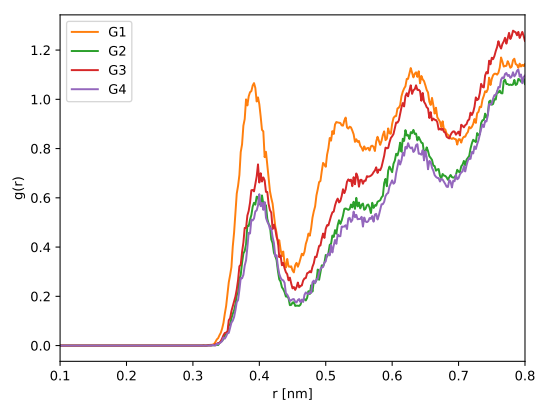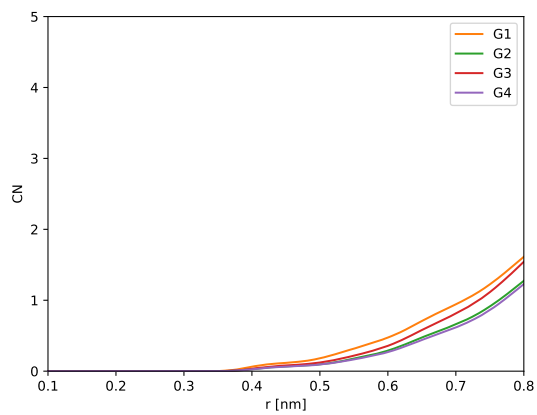

**I<sup>-</sup> – N-TFSI 300mM 1,000 ppm**

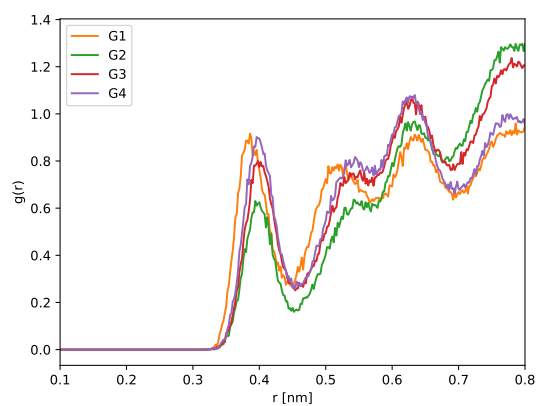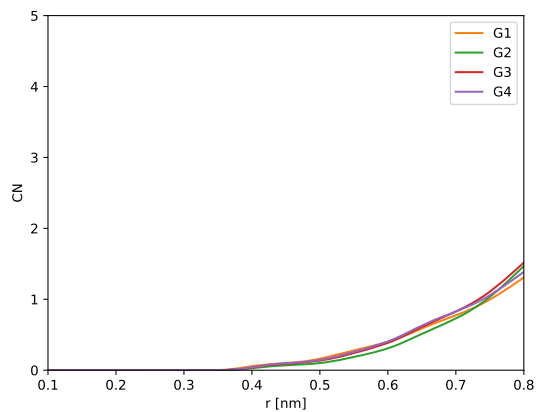

**I<sup>-</sup> – N-TFSI 300mM 5,000 ppm**

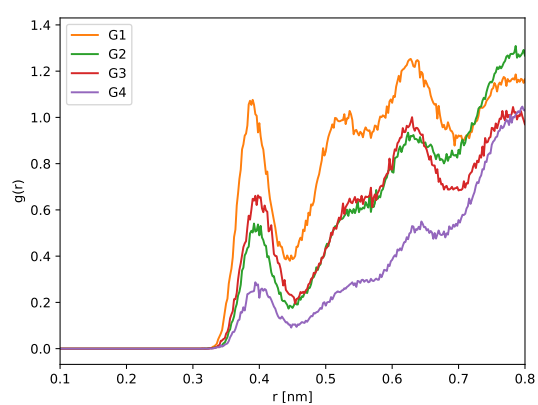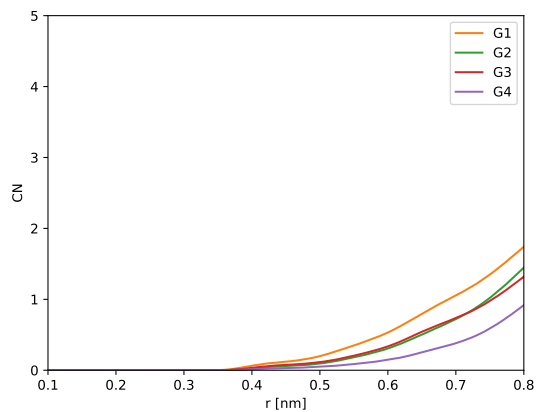

**I<sup>-</sup> – N-TFSI 300mM 20,000 ppm**

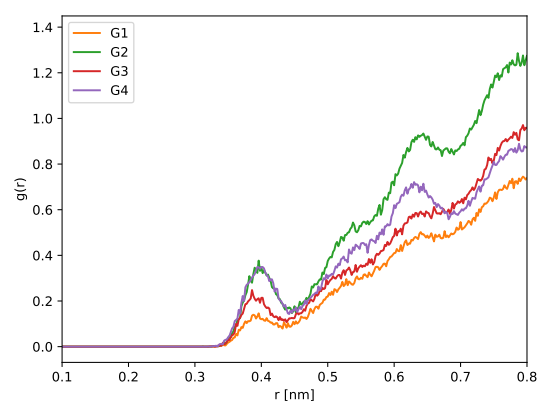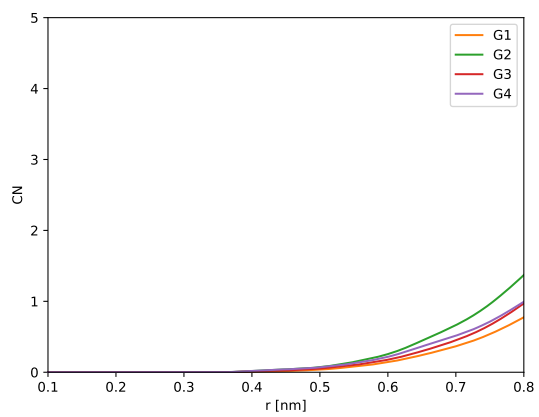

## 2.6 $I^- - Li^+$

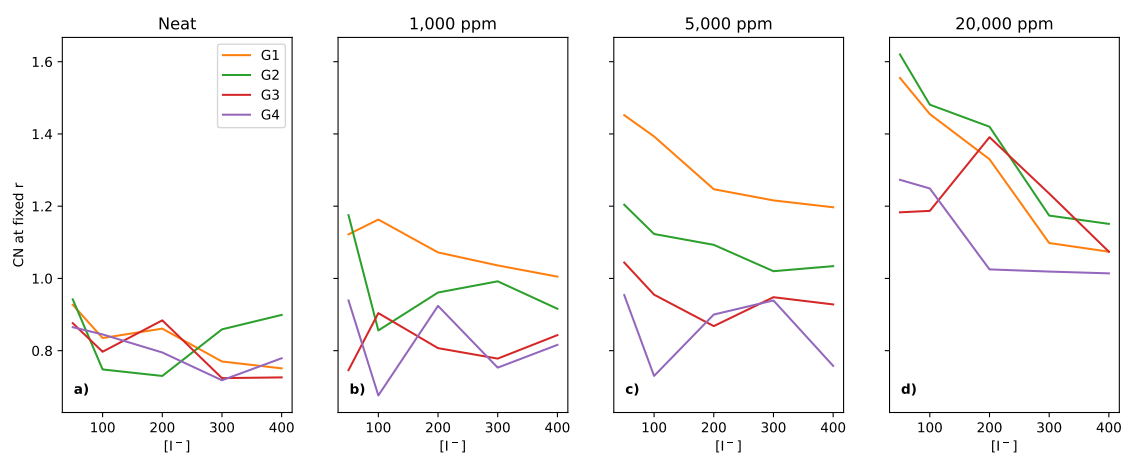

Figure 11: Coordination number of  $I^-$  to  $Li^+$  at a fixed distance of  $3 \text{ \AA}$ , for the four different glymes (G1 = yellow, G2 = green, G3 = red, G4 = purple) studied here, across the four different water concentrations (with a): neat, b): 1,000, c): 5,000, d): 20,000 ppm of water).

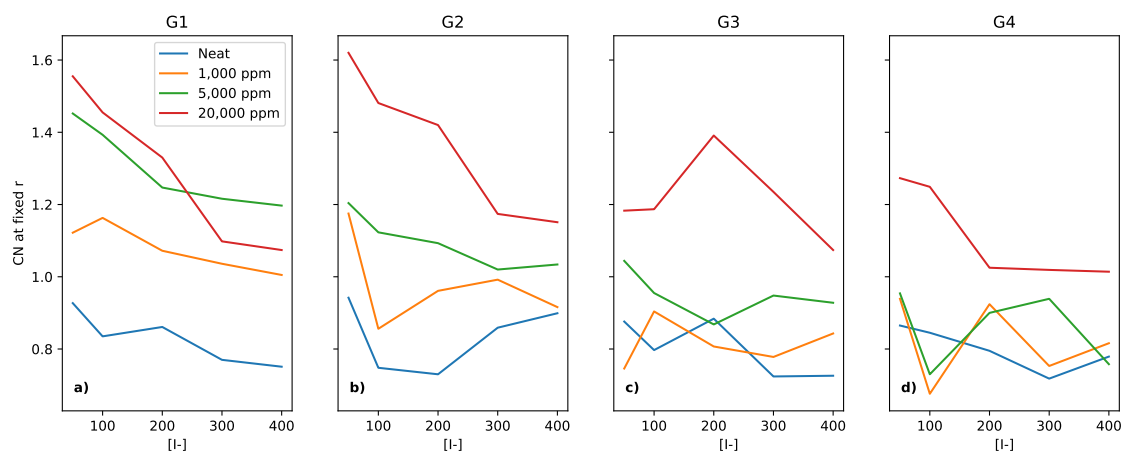

Figure 12: Coordination number of  $I^-$  to  $Li^+$  at a fixed distance of  $3 \text{ \AA}$ , for the four different water containing systems (neat = blue, 1,000 ppm = yellow, 5,000 ppm = green and 20,000 ppm = red) studied here, across the four different solvents (with a): G1, b): G2, c): G3 and d): G4).



**I<sup>-</sup> - Li<sup>+</sup> 50mM neat**

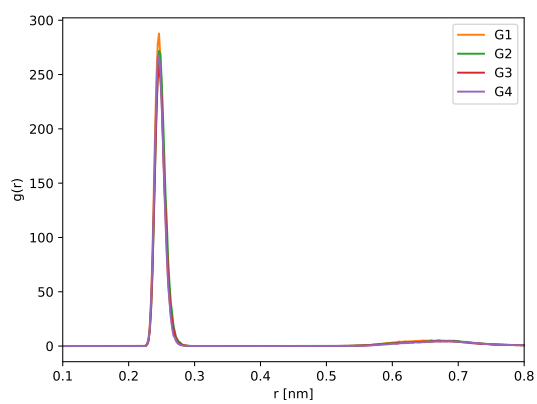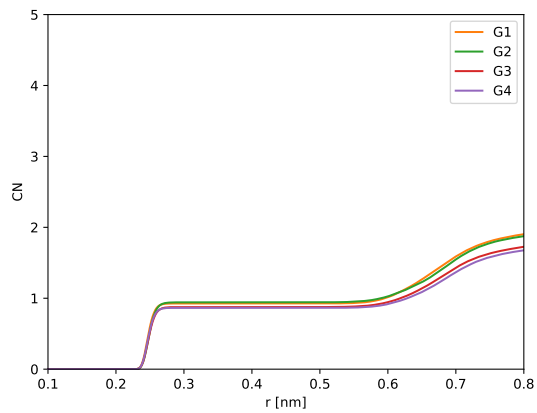

**I<sup>-</sup> - Li<sup>+</sup> 50mM 1,000 ppm**

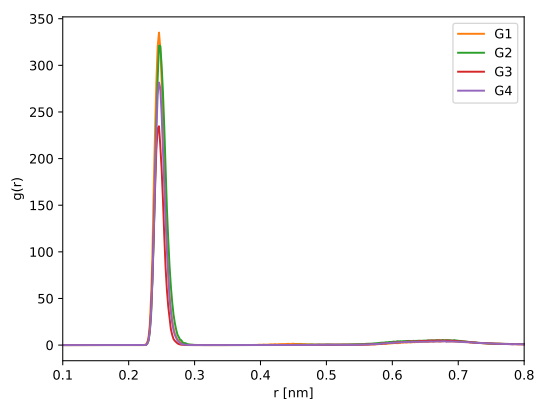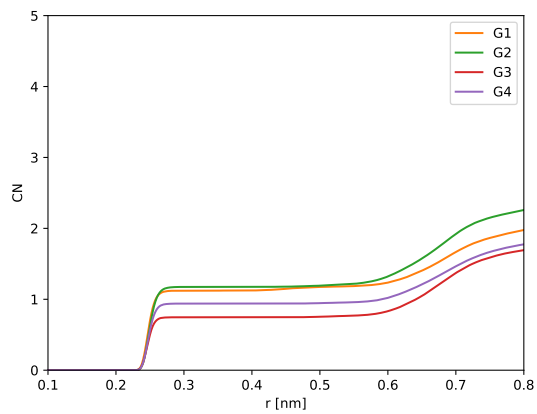

**I<sup>-</sup> - Li<sup>+</sup> 50mM 5,000 ppm**

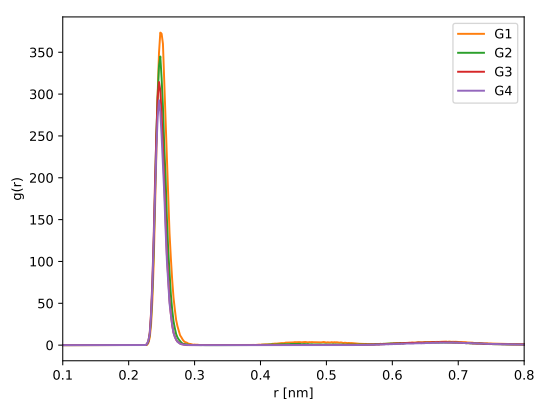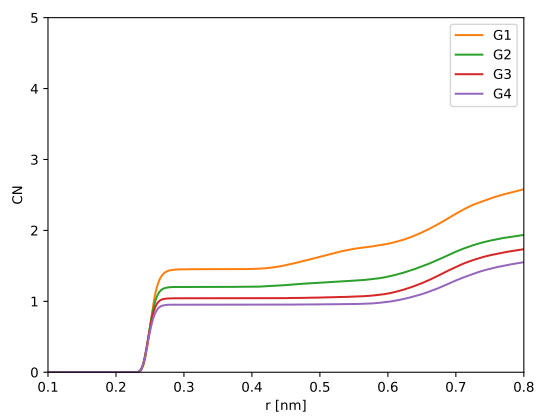

**I<sup>-</sup> - Li<sup>+</sup> 50mM 20,000 ppm**

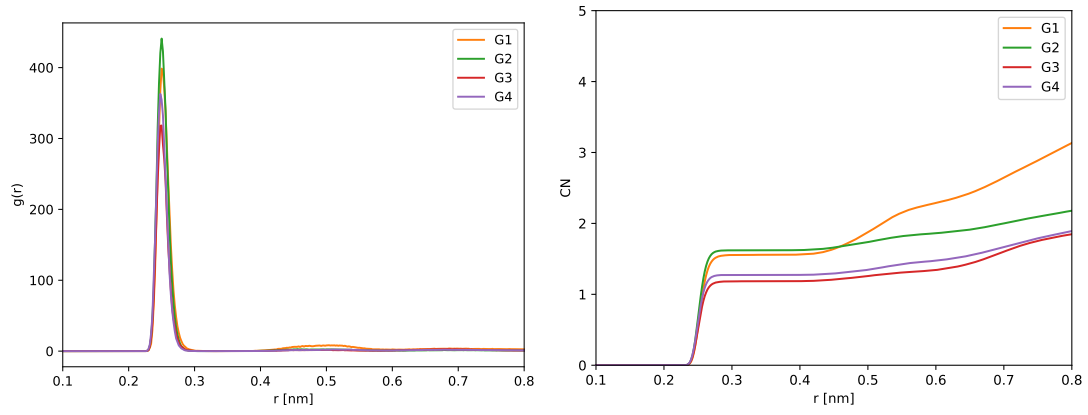

**I<sup>-</sup> - Li<sup>+</sup> 100mM neat**

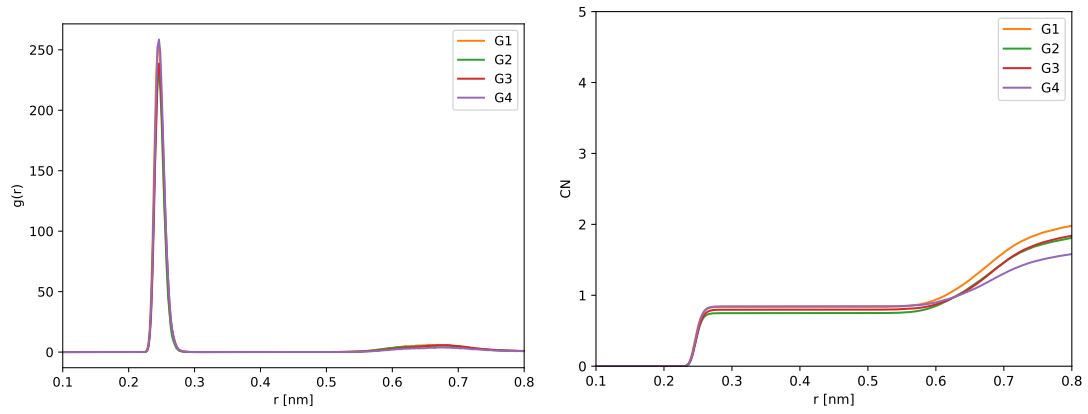

**I<sup>-</sup> - Li<sup>+</sup> 100mM 1,000 ppm**

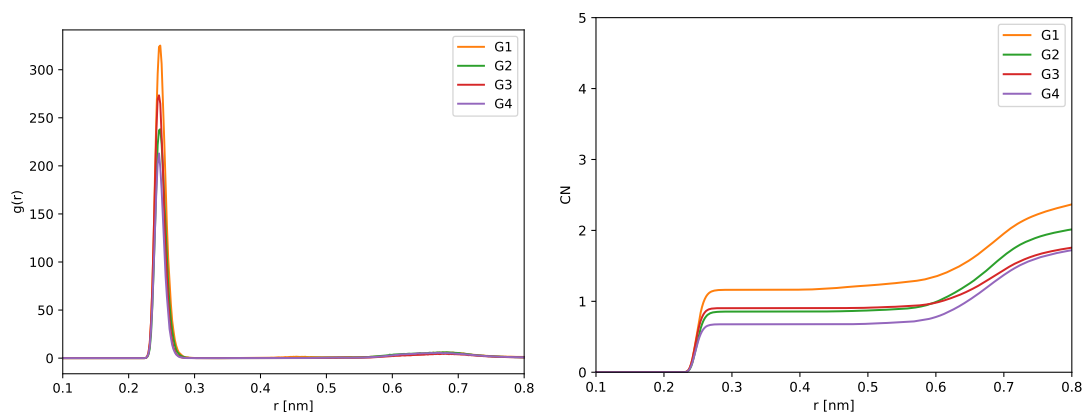

**I<sup>-</sup> - Li<sup>+</sup> 100mM 5,000 ppm**

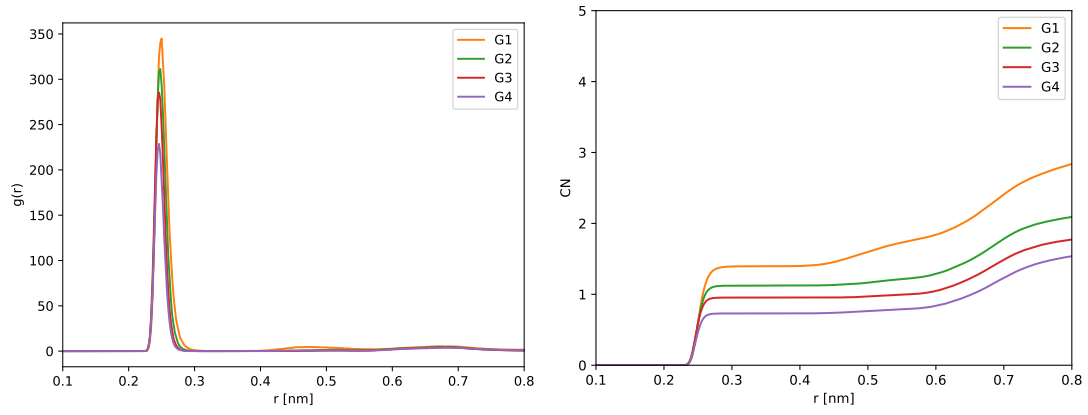

**I<sup>-</sup> - Li<sup>+</sup> 100mM 20,000 ppm**

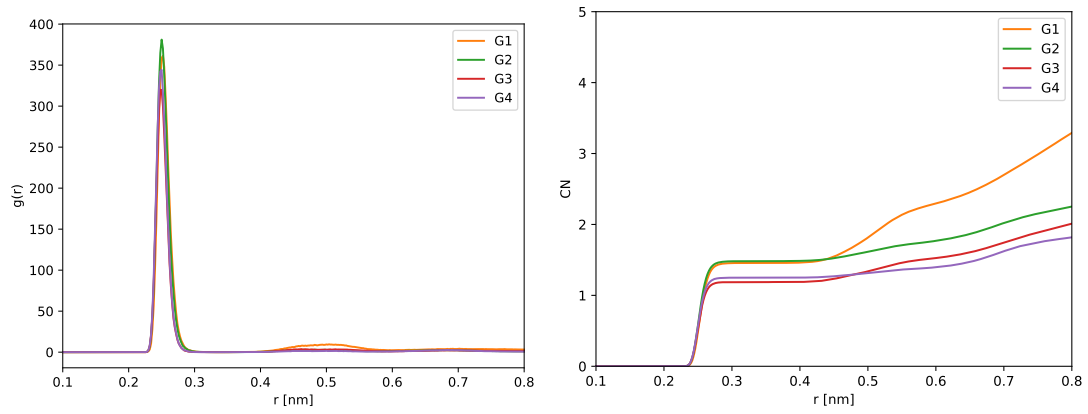

**I<sup>-</sup> - Li<sup>+</sup> 200mM neat**

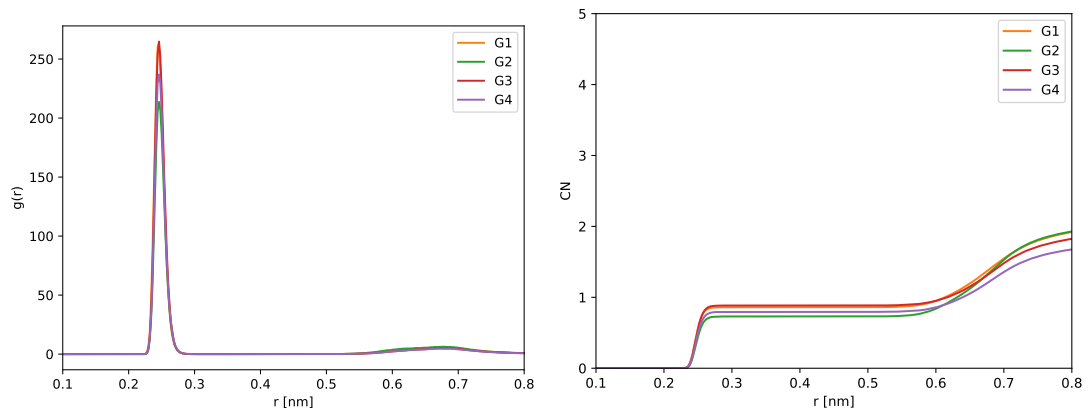

**I<sup>-</sup> - Li<sup>+</sup> 200mM 1,000 ppm**

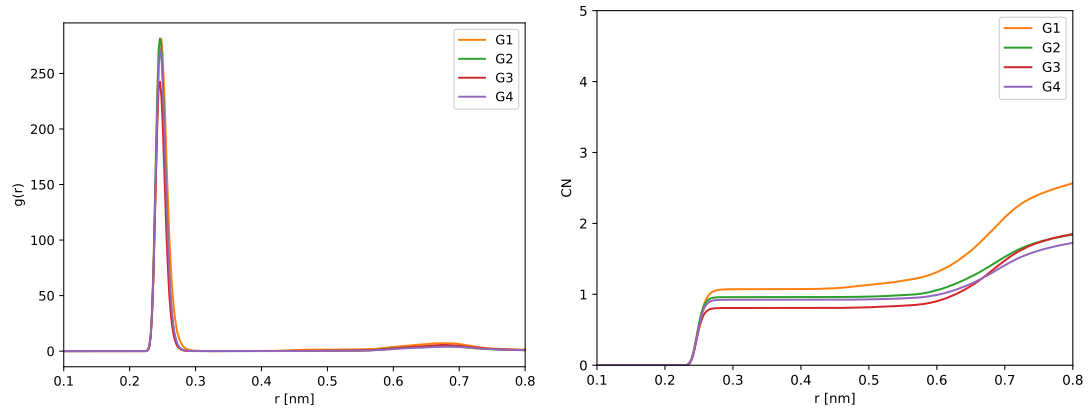

**I<sup>-</sup> - Li<sup>+</sup> 200mM 5,000 ppm**

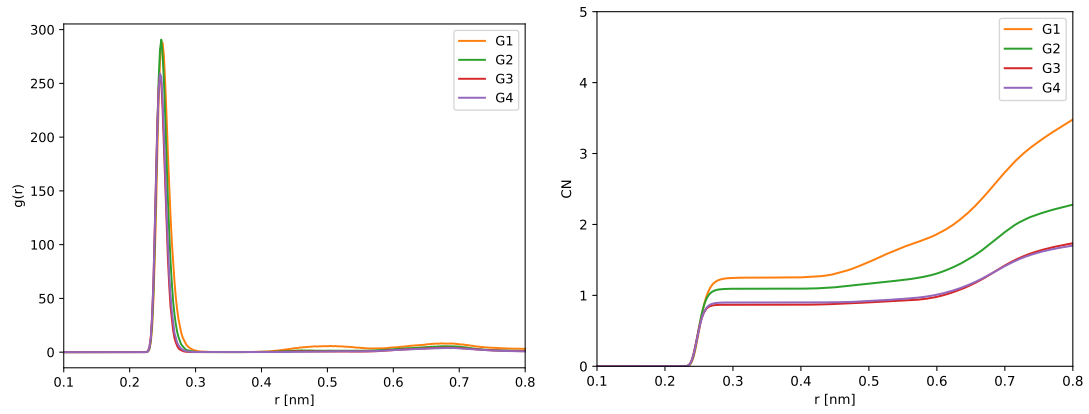

**I<sup>-</sup> - Li<sup>+</sup> 200mM 20,000 ppm**

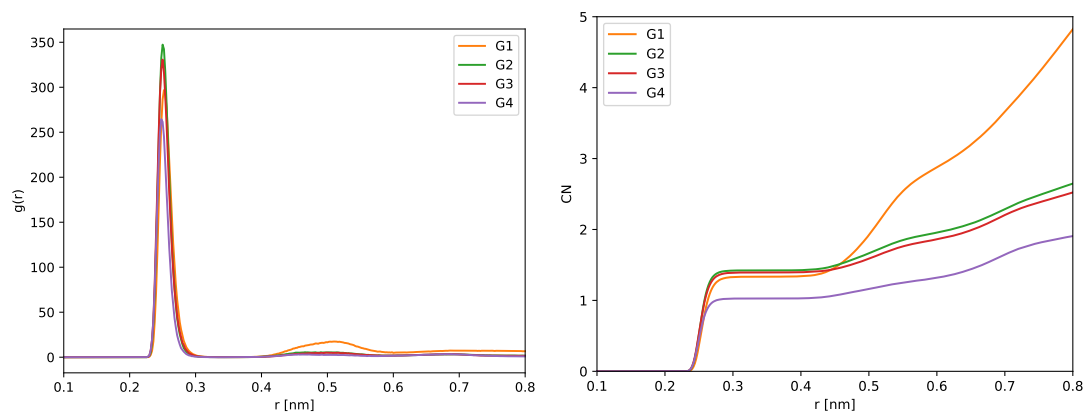

**I<sup>-</sup> - Li<sup>+</sup> 300mM neat**

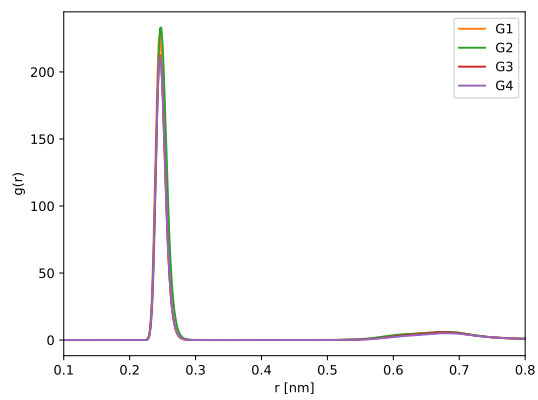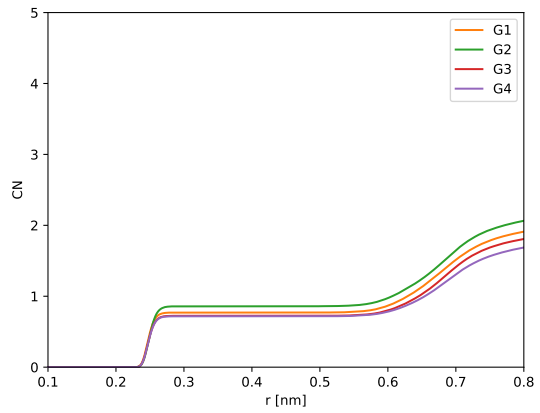

**I<sup>-</sup> - Li<sup>+</sup> 300mM 1,000 ppm**

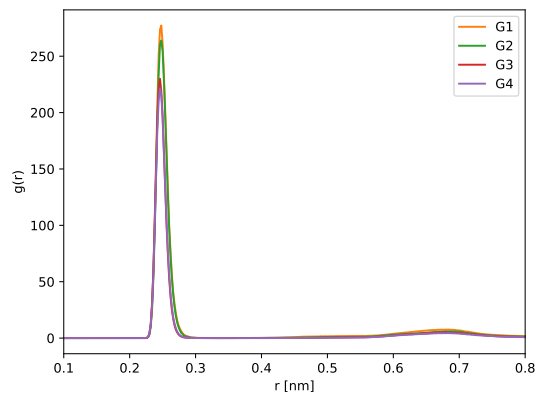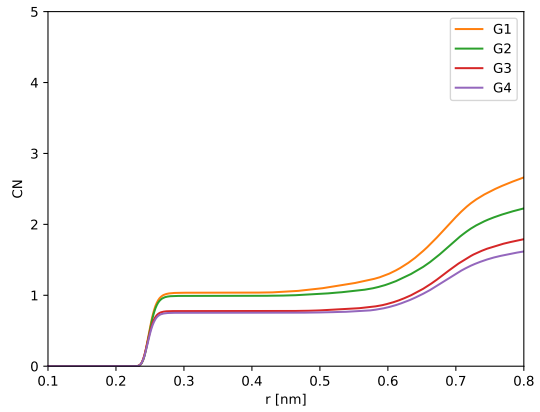

**I<sup>-</sup> - Li<sup>+</sup> 300mM 5,000 ppm**

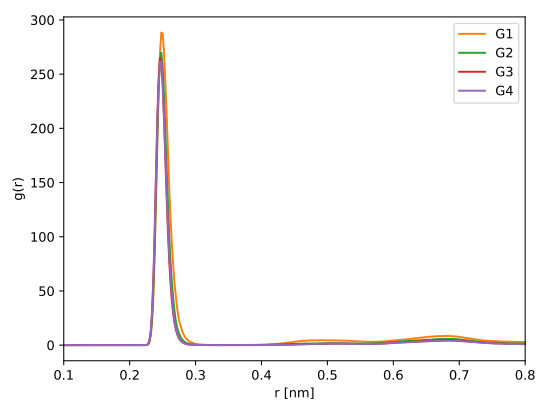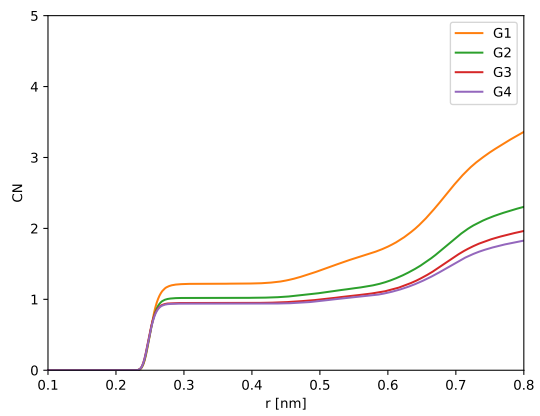

**I<sup>-</sup> - Li<sup>+</sup> 300mM 20,000 ppm**

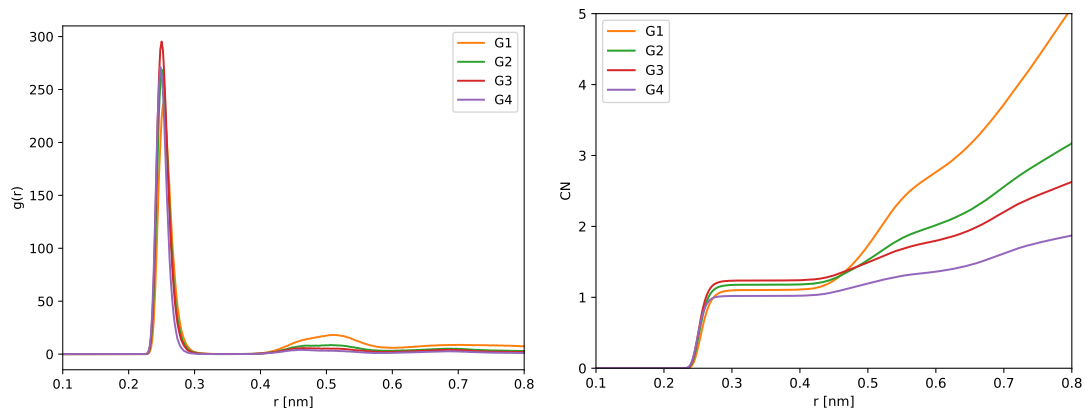

**I<sup>-</sup> - Li<sup>+</sup> 400mM neat**

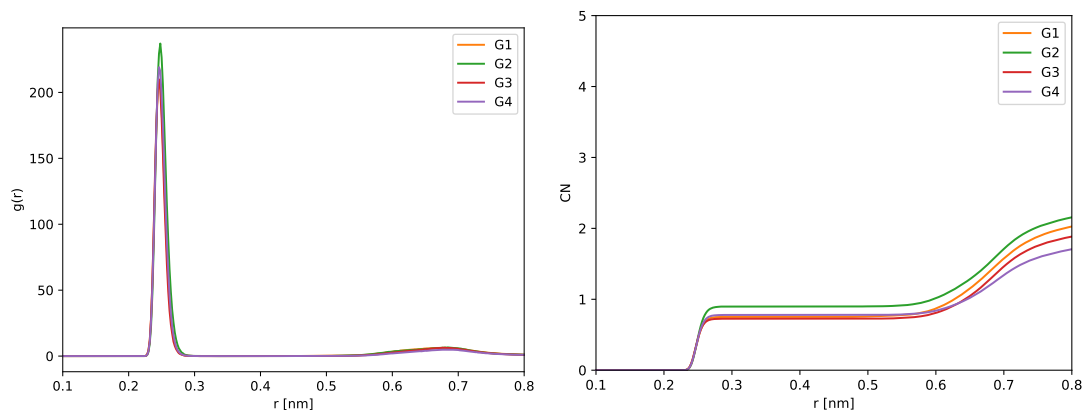

**I<sup>-</sup> - Li<sup>+</sup> 400mM 1,000 ppm**

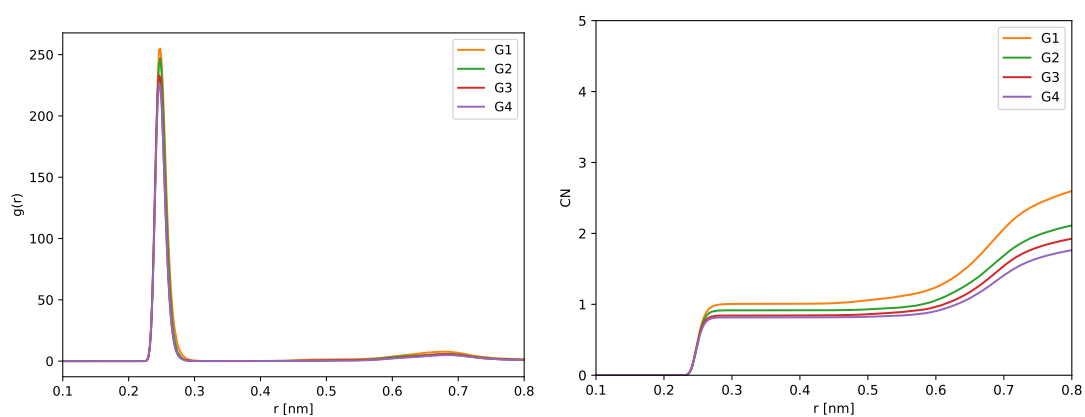

**I<sup>-</sup> - Li<sup>+</sup> 400mM 5,000 ppm**

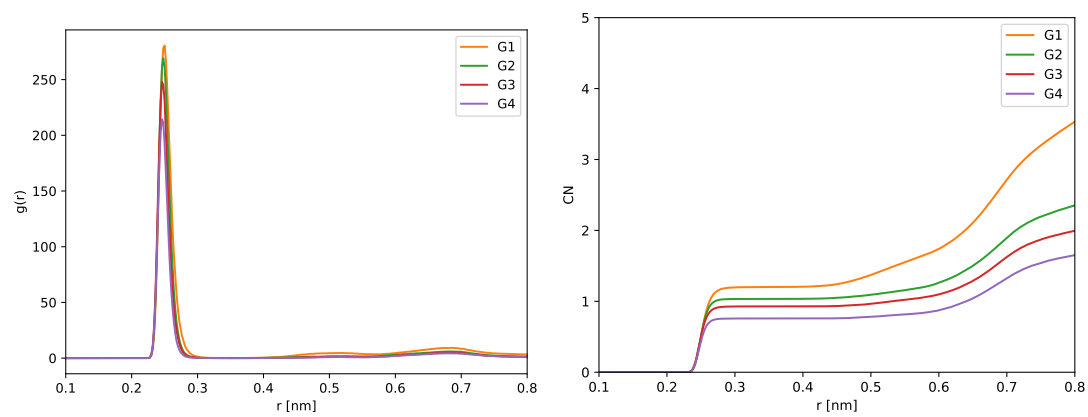

**I<sup>-</sup> - Li<sup>+</sup> 400mM 20,000 ppm**

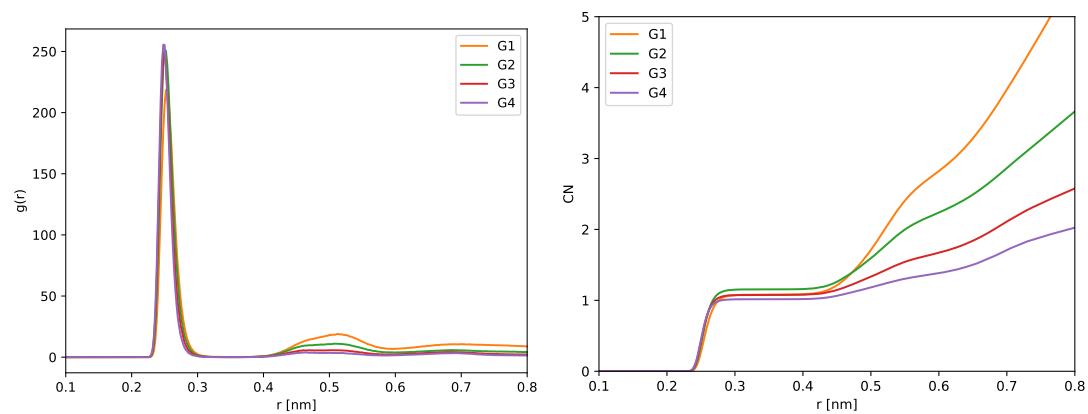

## 2.7 $\text{Li}^+ - \text{I}^-$

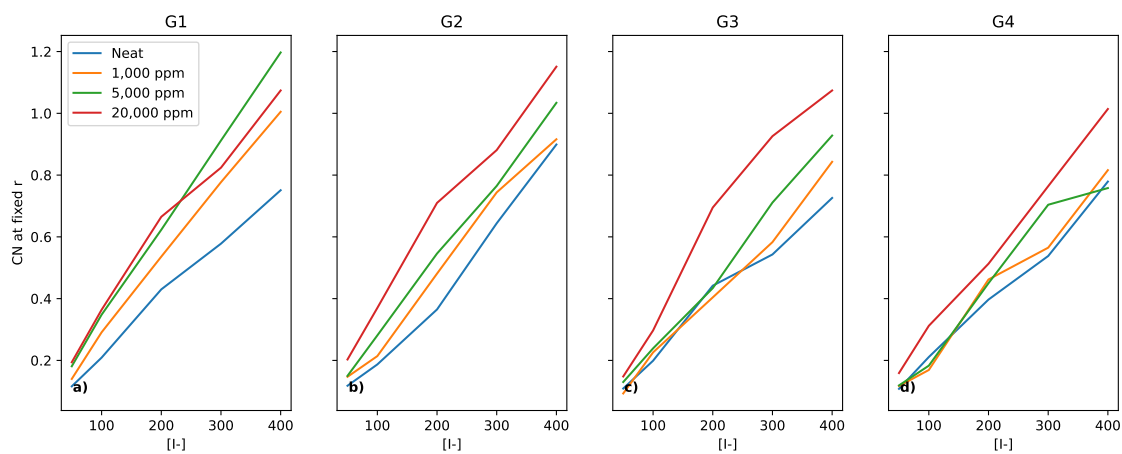

Figure 13: Coordination number of  $\text{Li}^+$  to  $\text{I}^-$  at a fixed distance of  $3 \text{ \AA}$ , for the four different glymes (G1 = yellow, G2 = green, G3 = red, G4 = purple) studied here, across the four different water concentrations (with a): neat, b): 1,000, c): 5,000, d): 20,000 ppm of water).

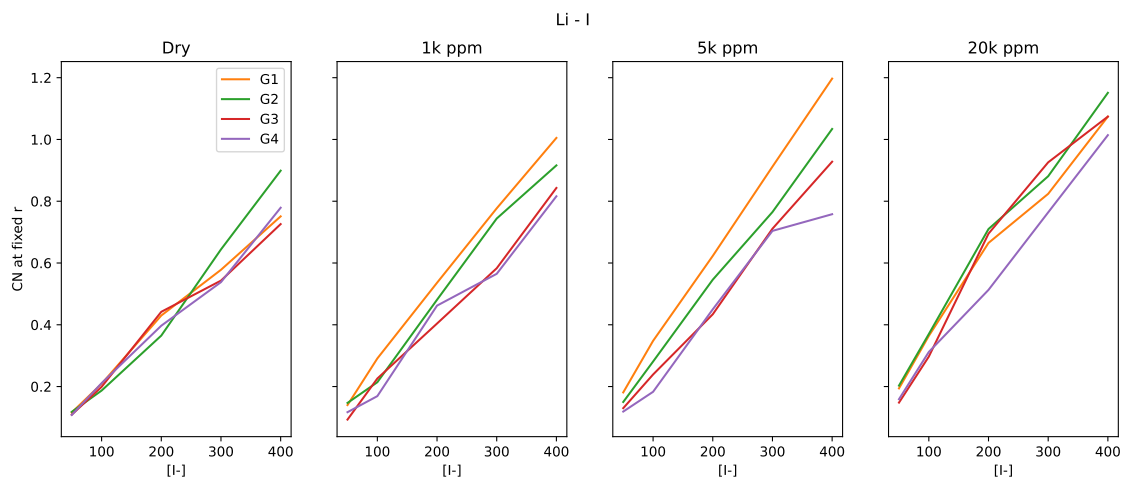

Figure 14: Coordination number of  $\text{Li}^+$  to  $\text{I}^-$  at a fixed distance of  $3 \text{ \AA}$ , for the four different glymes (G1 = yellow, G2 = green, G3 = red, G4 = purple) studied here, across the four different water concentrations (with a): neat, b): 1,000, c): 5,000, d): 20,000 ppm of water).



**Li<sup>+</sup> - I<sup>-</sup> 50mM neat**

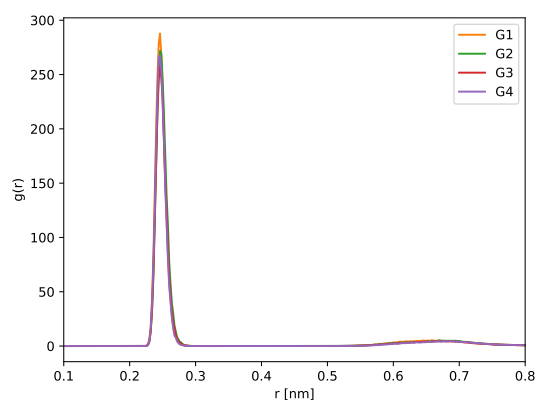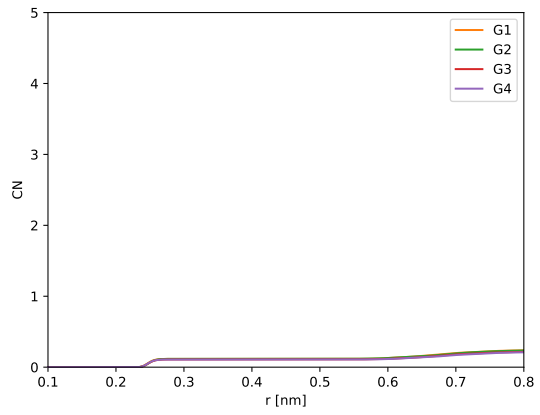

**Li<sup>+</sup> - I<sup>-</sup> 50mM 1,000 ppm**

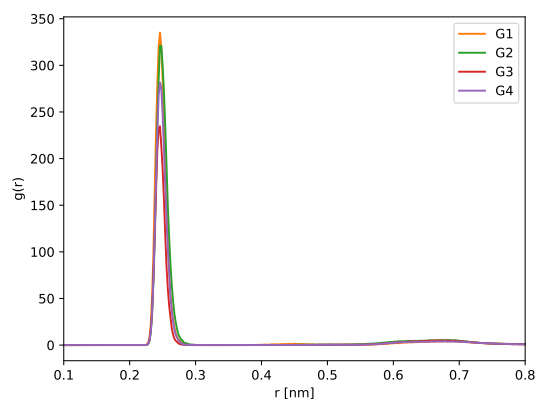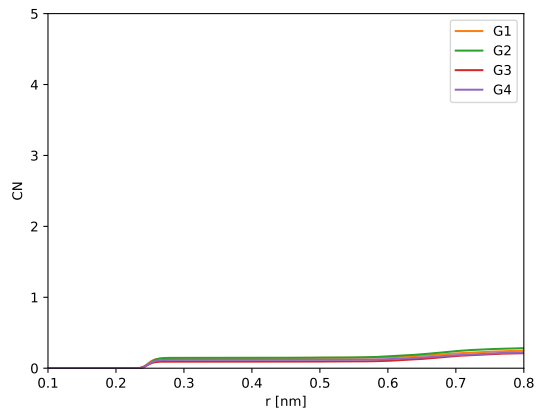

**Li<sup>+</sup> - I<sup>-</sup> 50mM 5,000 ppm**

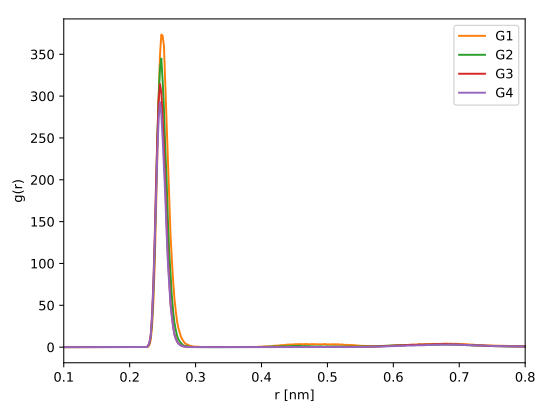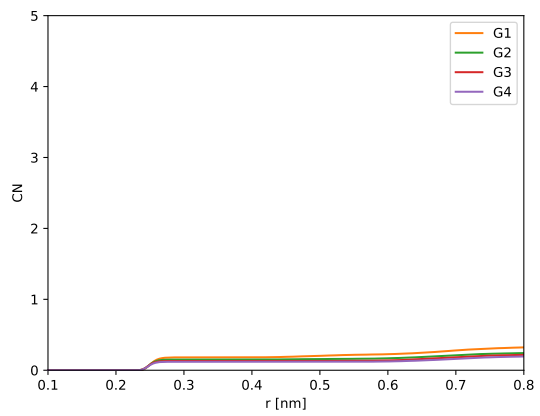

**Li<sup>+</sup> – I<sup>-</sup> 50mM 20,000 ppm**

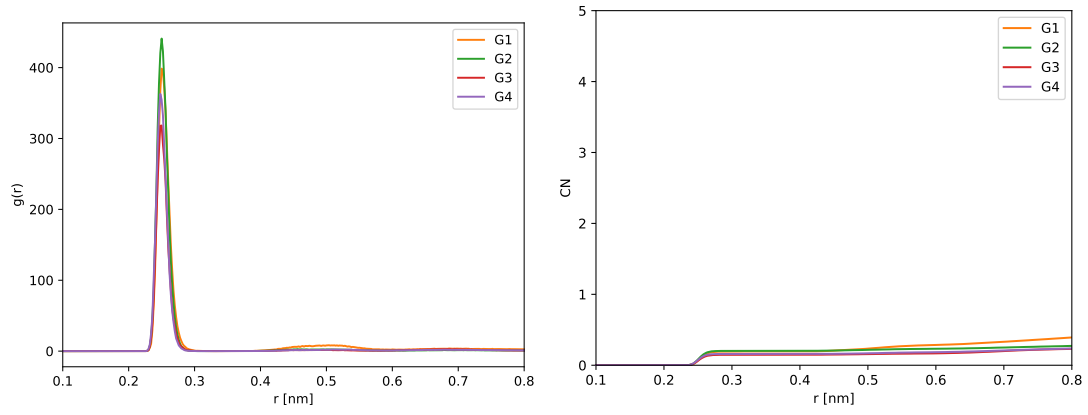

**Li<sup>+</sup> – I<sup>-</sup> 100mM neat**

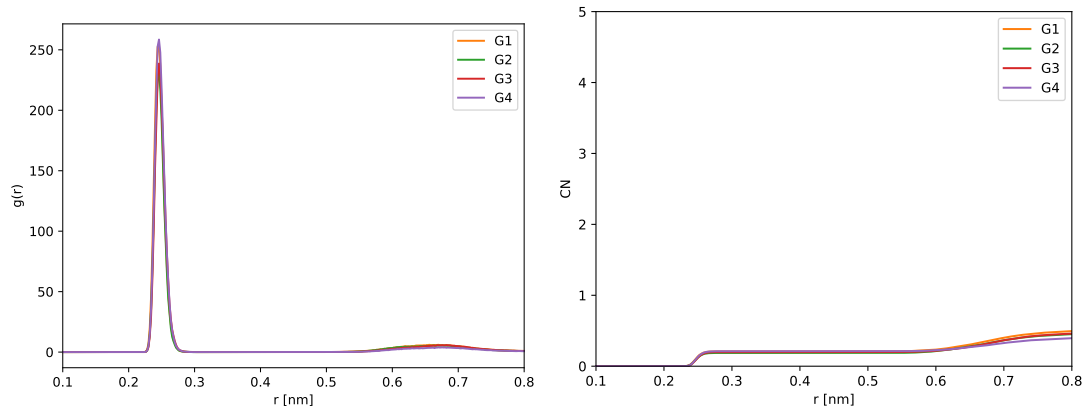

**Li<sup>+</sup> – I<sup>-</sup> 100mM 1,000 ppm**

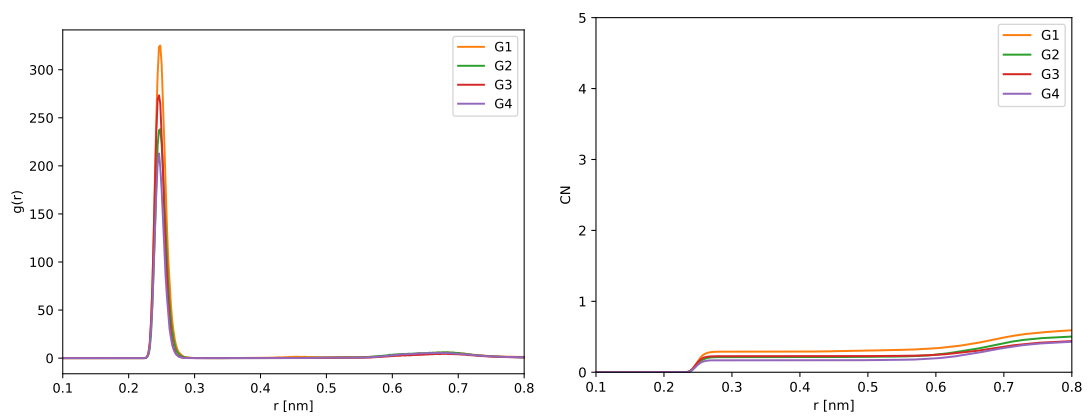

**Li<sup>+</sup> – I<sup>-</sup> 100mM 5,000 ppm**

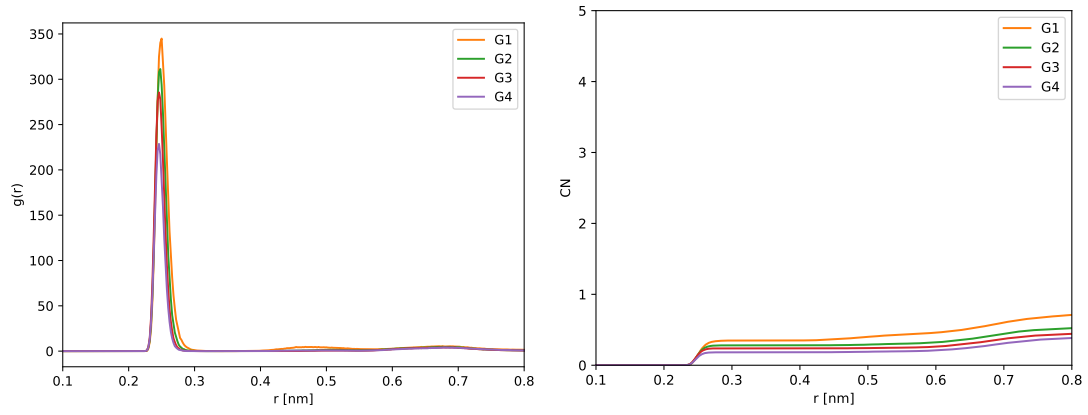

**Li<sup>+</sup> – I<sup>-</sup> 100mM 20,000 ppm**

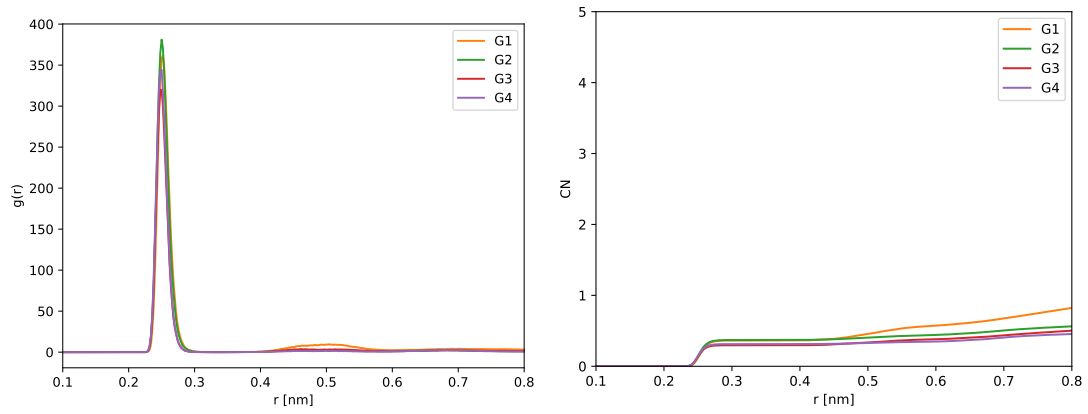

**Li<sup>+</sup> – I<sup>-</sup> 200mM neat**

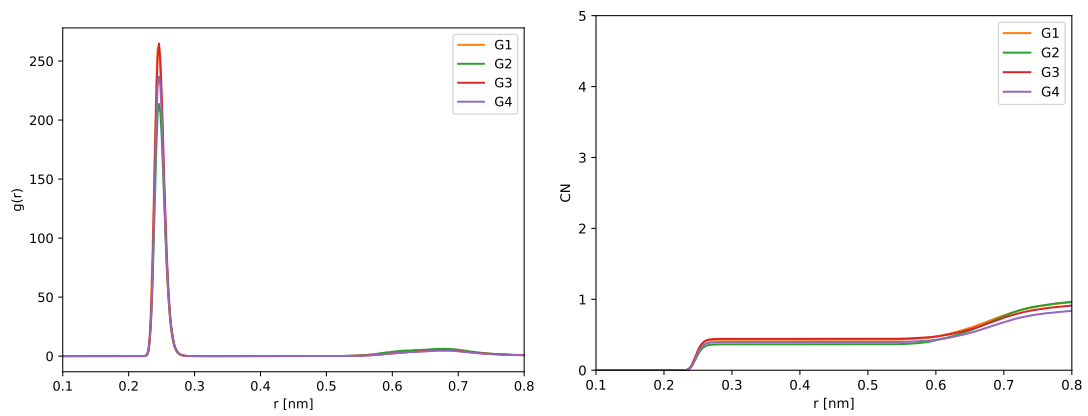

**Li<sup>+</sup> – I<sup>-</sup> 200mM 1,000 ppm**

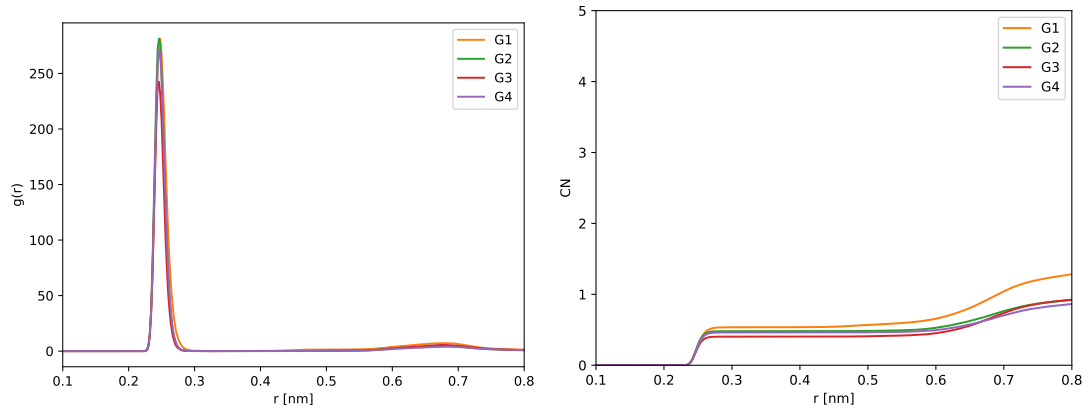

**Li<sup>+</sup> – I<sup>-</sup> 200mM 5,000 ppm**

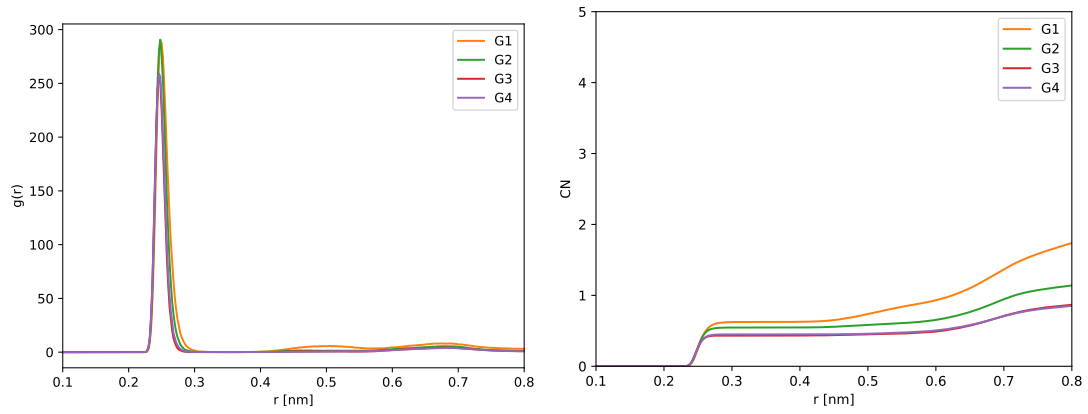

**Li<sup>+</sup> – I<sup>-</sup> 200mM 20,000 ppm**

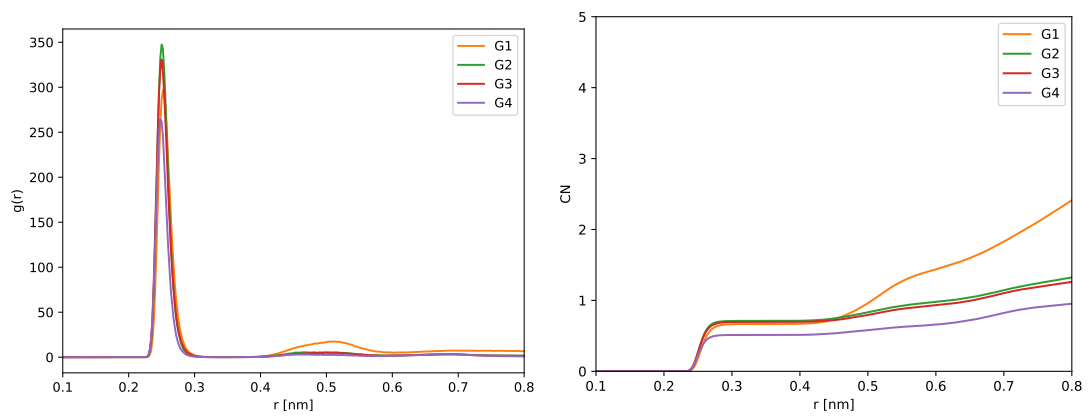

**Li<sup>+</sup> - I<sup>-</sup> 300mM neat**

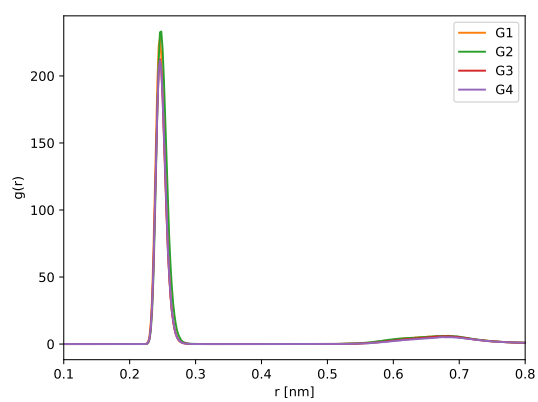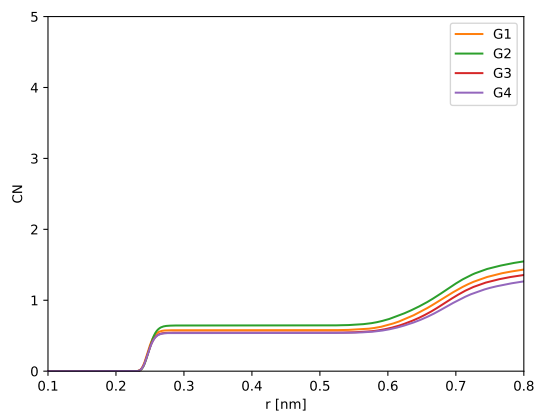

**Li<sup>+</sup> - I<sup>-</sup> 300mM 1,000 ppm**

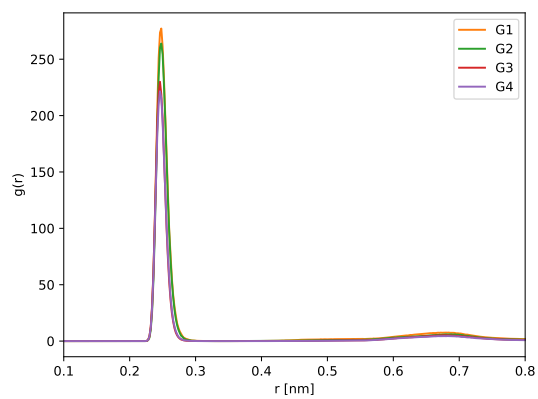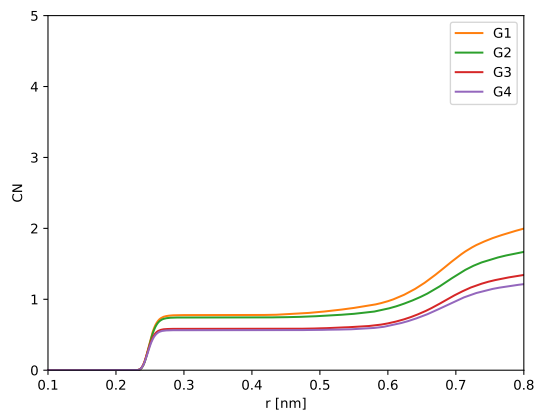

**Li<sup>+</sup> - I<sup>-</sup> 300mM 5,000 ppm**

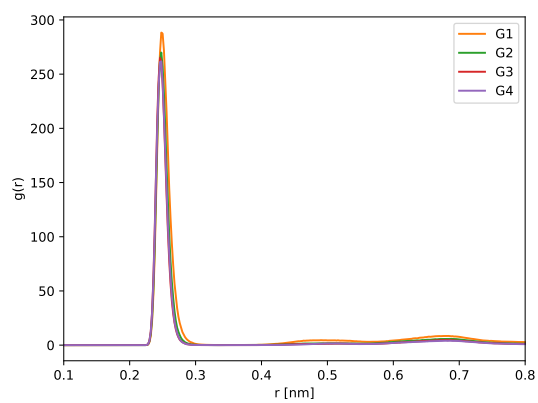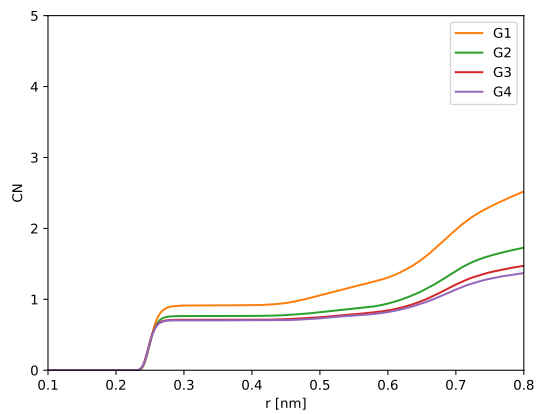

**Li<sup>+</sup> – I<sup>-</sup> 300mM 20,000 ppm**

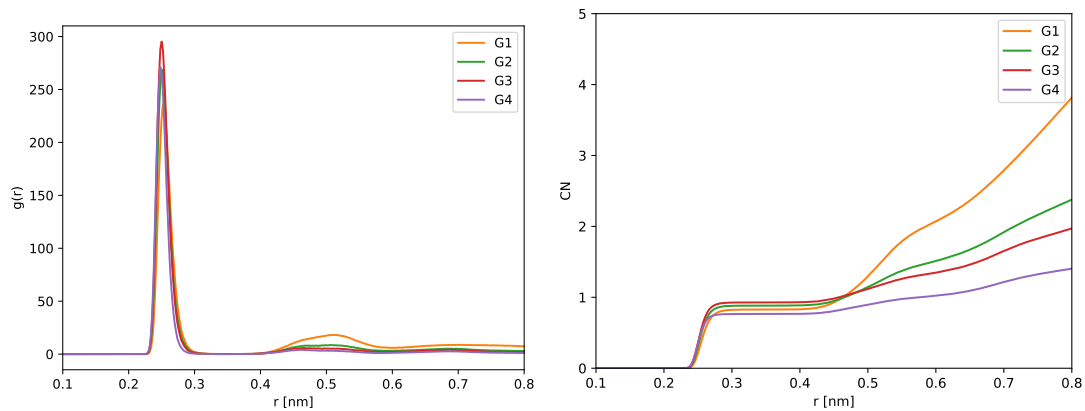

**Li<sup>+</sup> – I<sup>-</sup> 400mM neat**

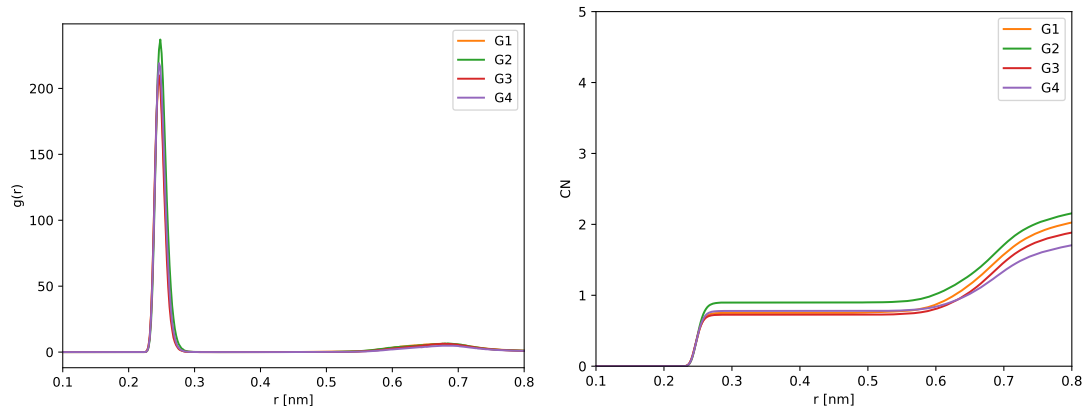

**Li<sup>+</sup> – I<sup>-</sup> 400mM 1,000 ppm**

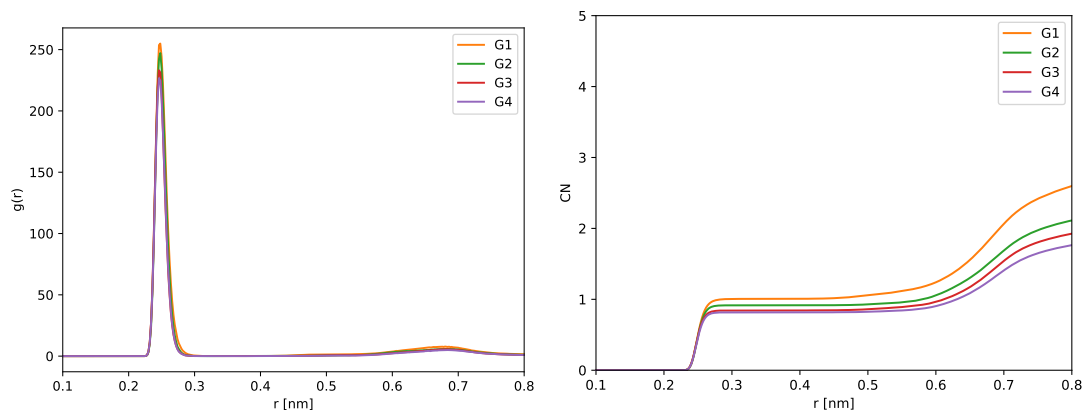

**Li<sup>+</sup> – I<sup>-</sup> 400mM 5,000 ppm**

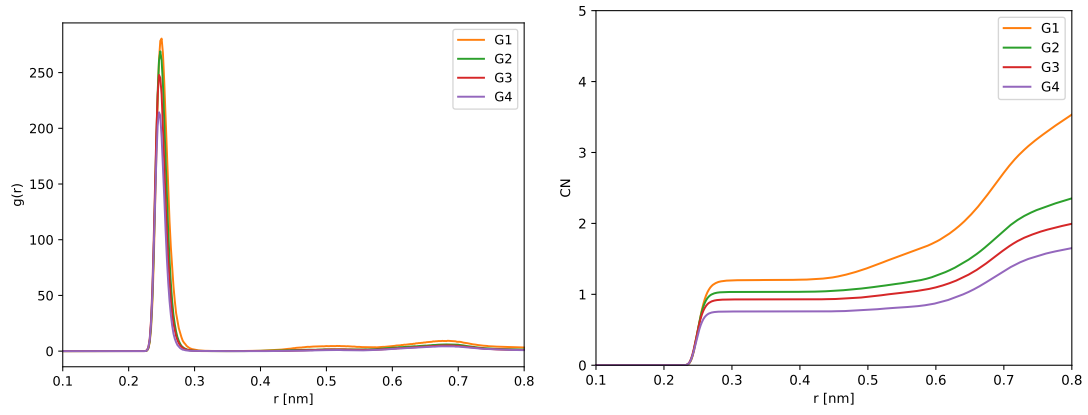

**Li<sup>+</sup> – I<sup>-</sup> 400mM 20,000 ppm**

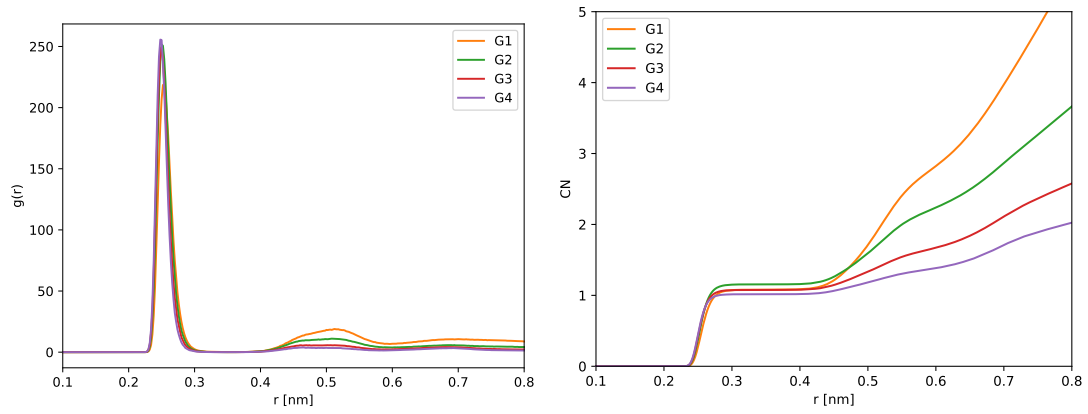

## 2.8 $\text{Li}^+ - \text{Li}^+$

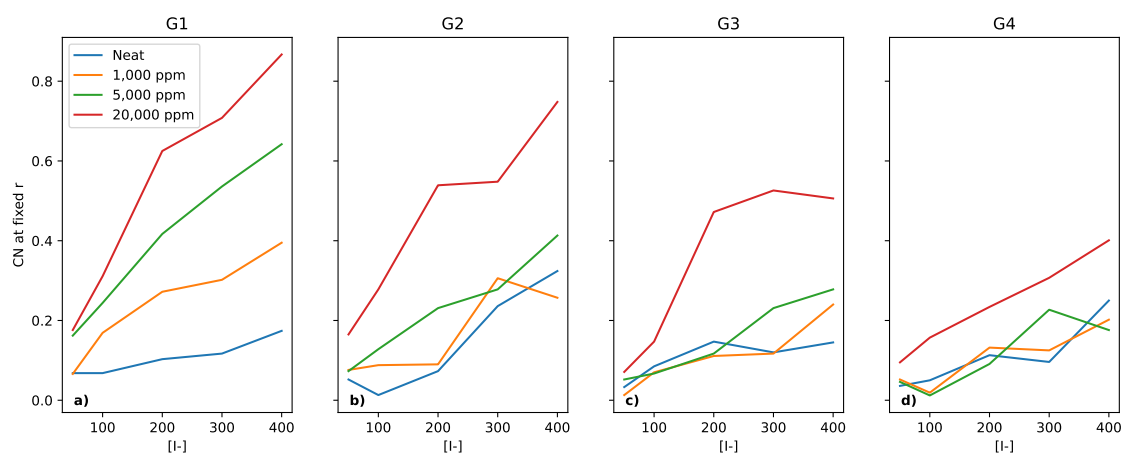

Figure 15: Coordination number of  $\text{Li}^+$  to  $\text{Li}^+$  at a fixed distance of  $5.5 \text{ \AA}$ , for the four different glymes (G1 = yellow, G2 = green, G3 = red, G4 = purple) studied here, across the four different water concentrations (with a): neat, b): 1,000, c): 5,000, d): 20,000 ppm of water).

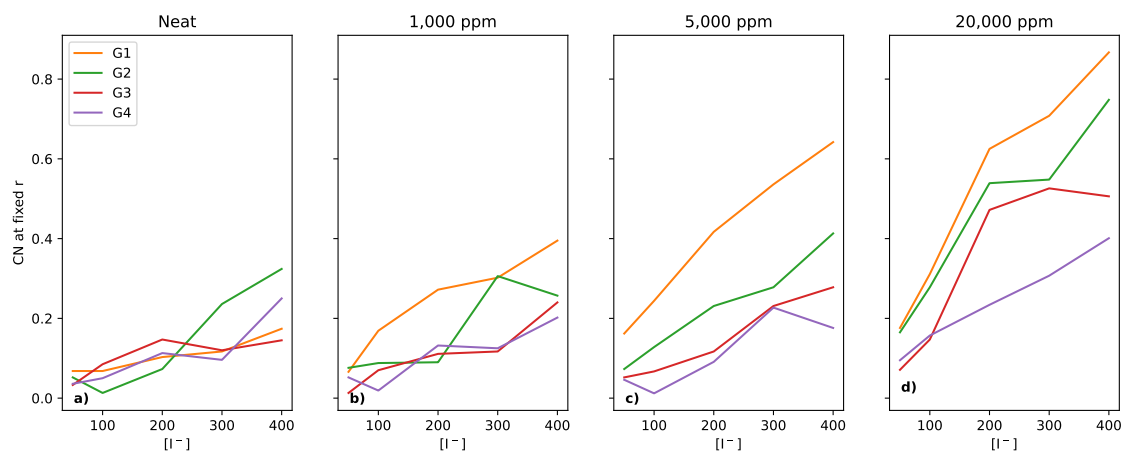

Figure 16: Coordination number of  $\text{Li}^+$  to  $\text{Li}^+$  at a fixed distance of  $5.5 \text{ \AA}$ , for the four different glymes (G1 = yellow, G2 = green, G3 = red, G4 = purple) studied here, across the four different water concentrations (with a): neat, b): 1,000, c): 5,000, d): 20,000 ppm of water).



**Li<sup>+</sup> – Li<sup>+</sup> 50mM neat**

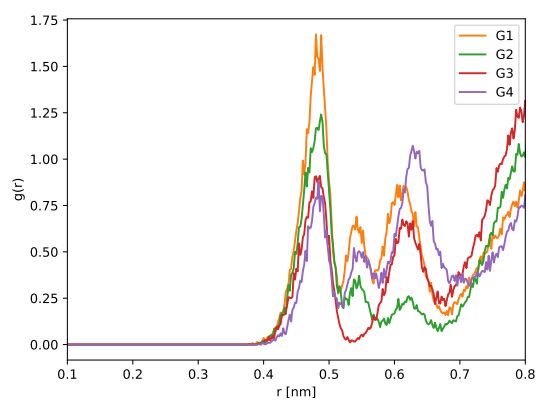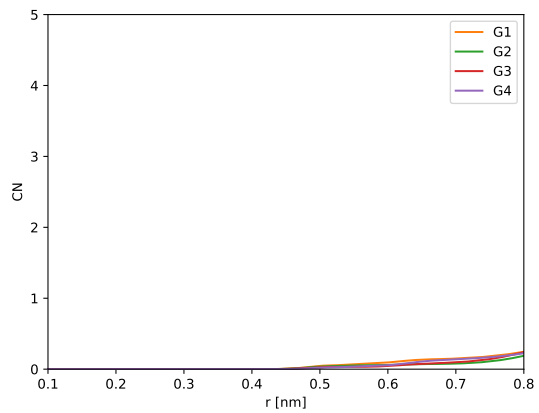

**Li<sup>+</sup> – Li<sup>+</sup> 50mM 1,000 ppm**

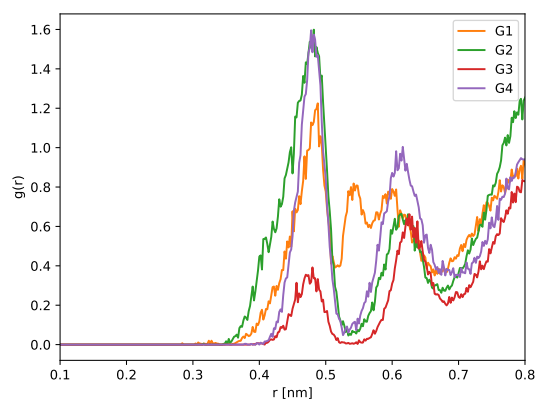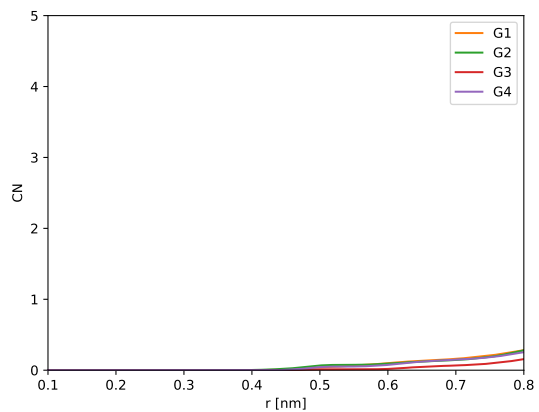

**Li<sup>+</sup> – Li<sup>+</sup> 50mM 5,000 ppm**

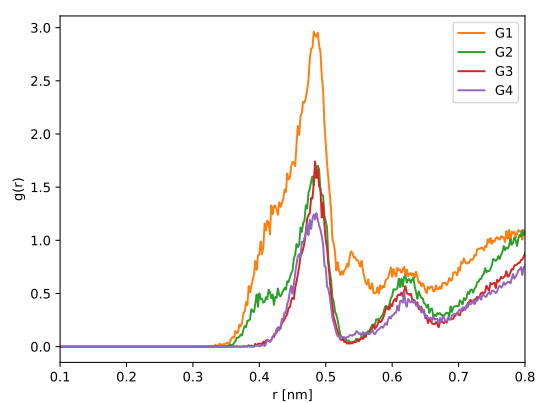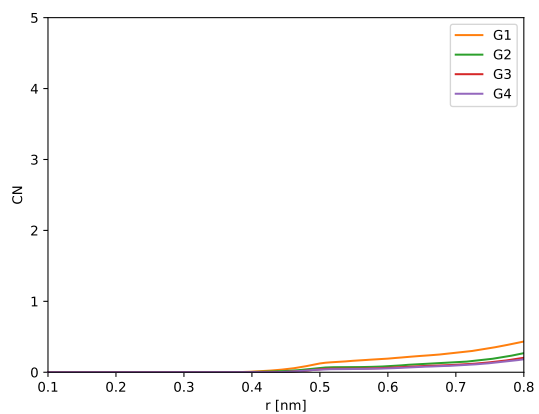

**Li<sup>+</sup> – Li<sup>+</sup> 50mM 20,000 ppm**

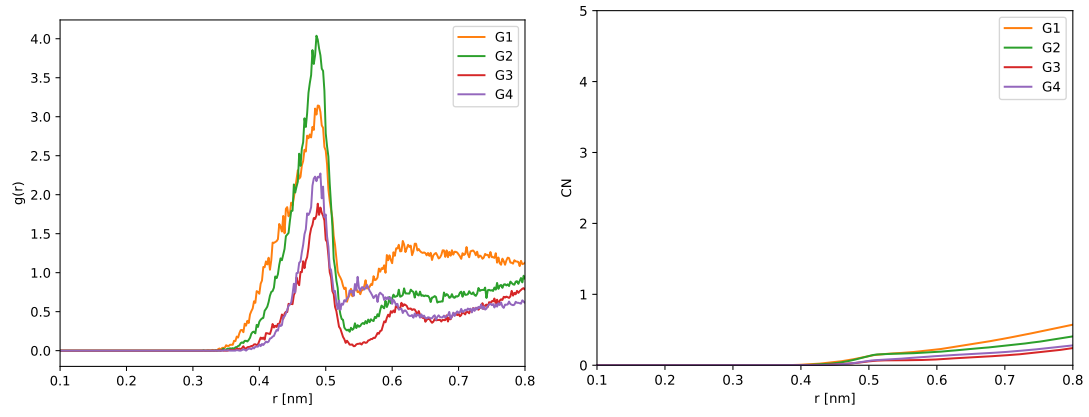

**Li<sup>+</sup> – Li<sup>+</sup> 100mM neat**

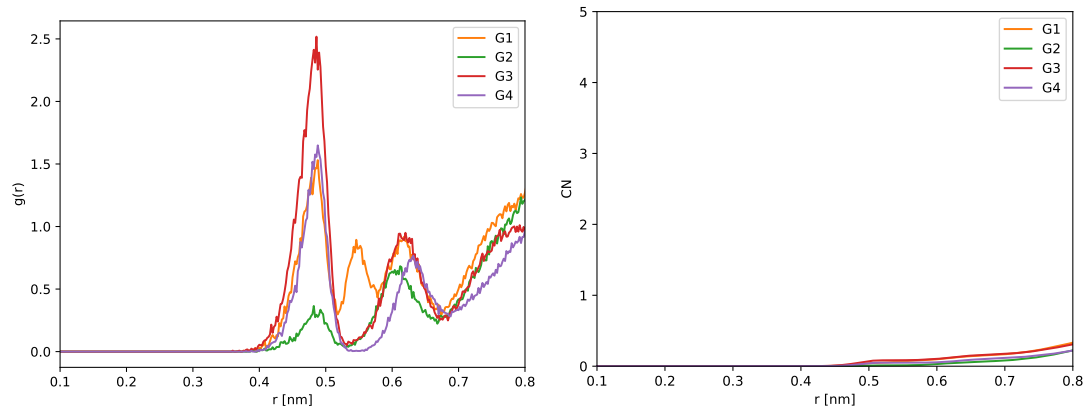

**Li<sup>+</sup> – Li<sup>+</sup> 100mM 1,000 ppm**

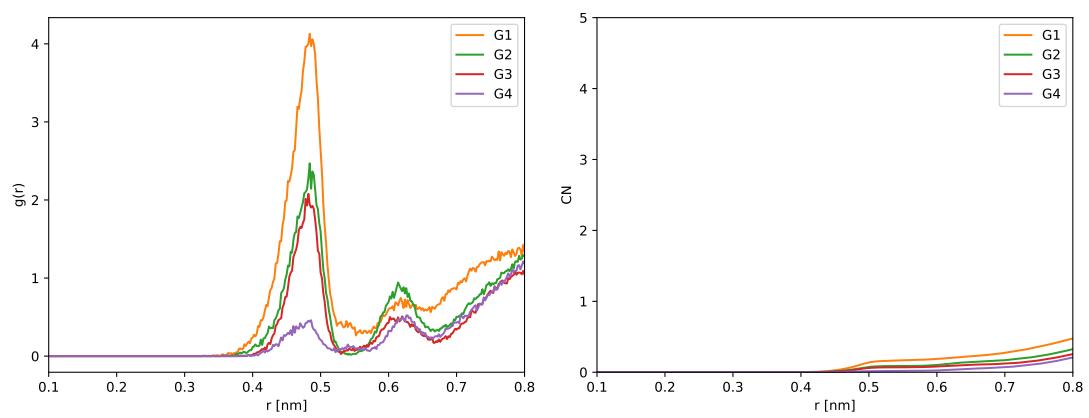

**Li<sup>+</sup> – Li<sup>+</sup> 100mM 5,000 ppm**

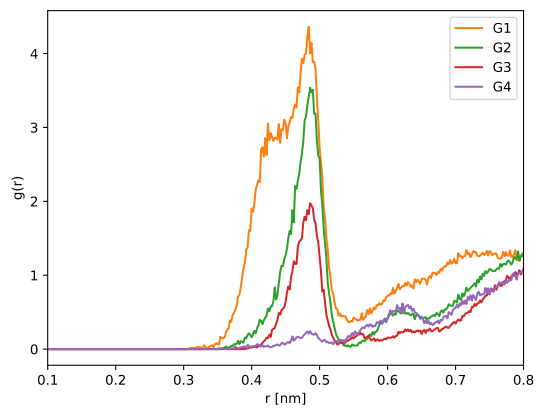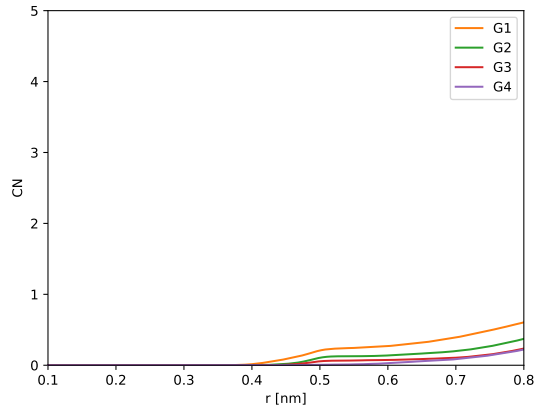

**Li<sup>+</sup> – Li<sup>+</sup> 100mM 20,000 ppm**

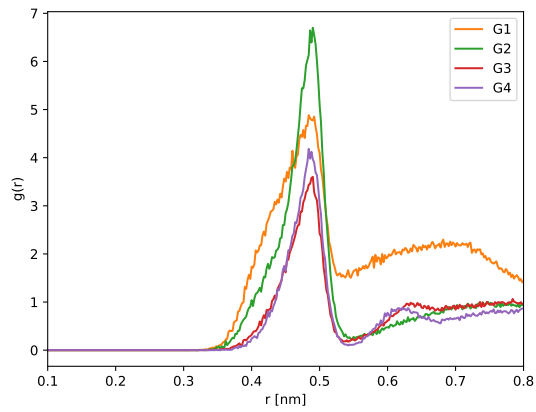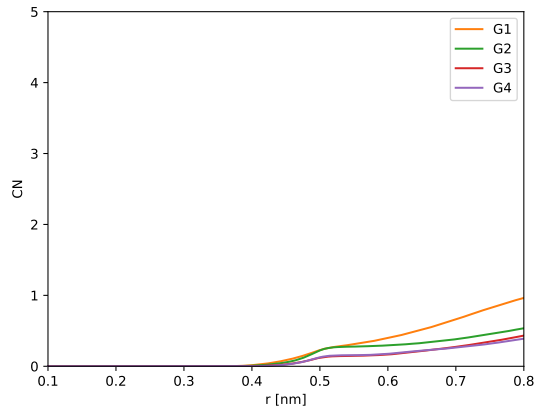

**Li<sup>+</sup> – Li<sup>+</sup> 200mM neat**

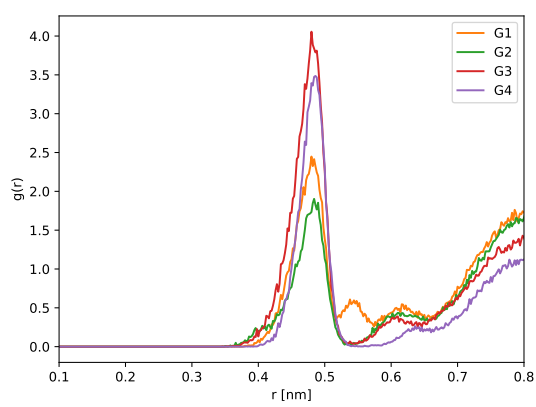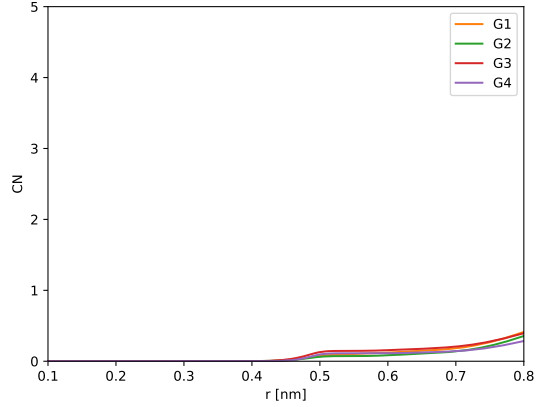

**Li<sup>+</sup> – Li<sup>+</sup> 200mM 1,000 ppm**

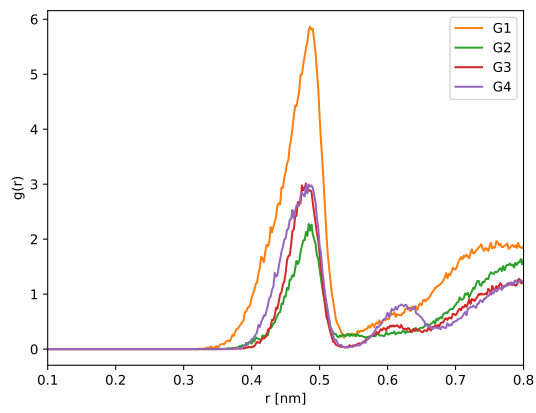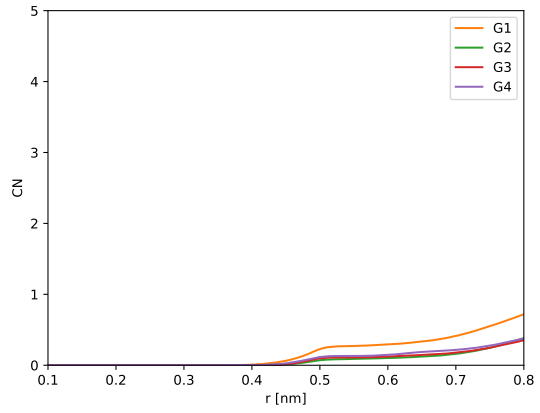

**Li<sup>+</sup> – Li<sup>+</sup> 200mM 5,000 ppm**

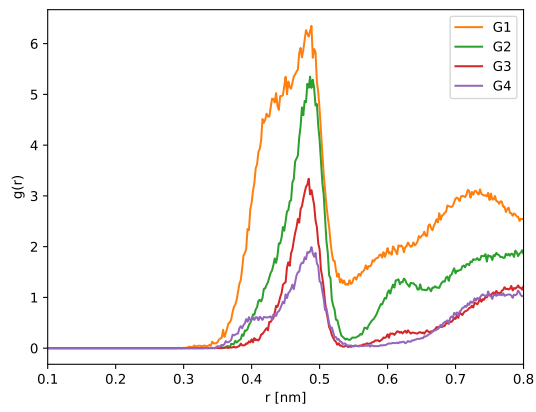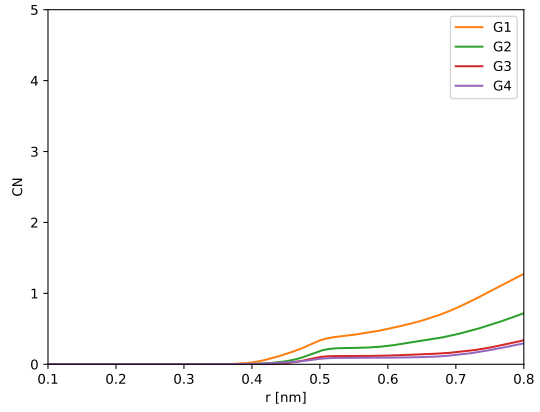

**Li<sup>+</sup> – Li<sup>+</sup> 200mM 20,000 ppm**

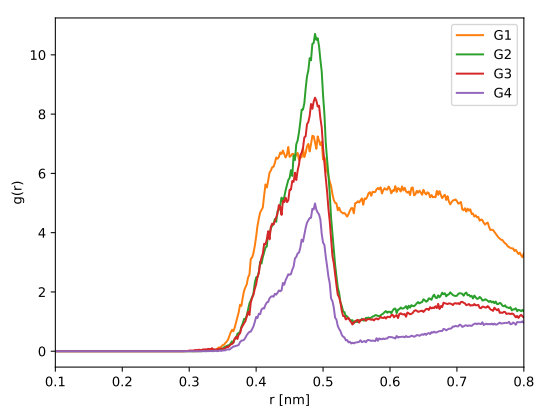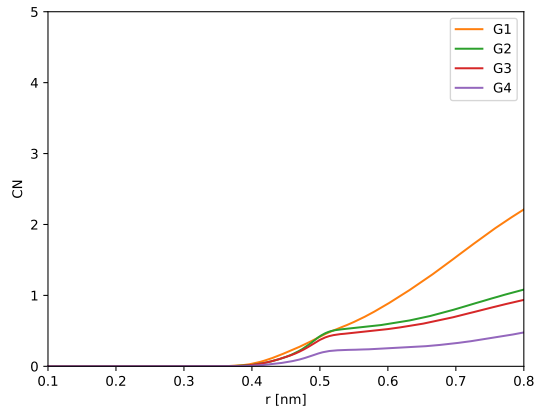

**Li<sup>+</sup> – Li<sup>+</sup> 300mM neat**

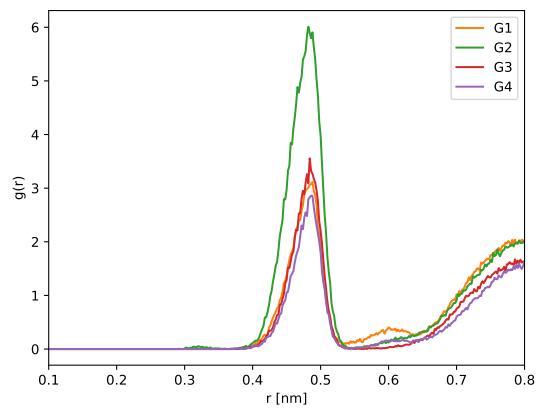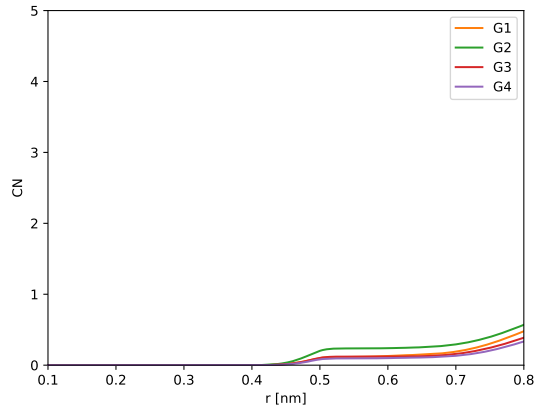

**Li<sup>+</sup> – Li<sup>+</sup> 300mM 1,000 ppm**

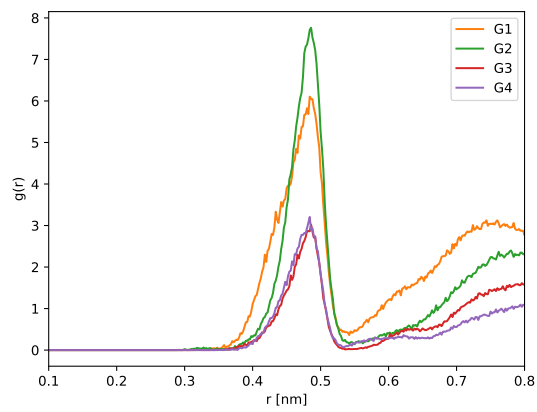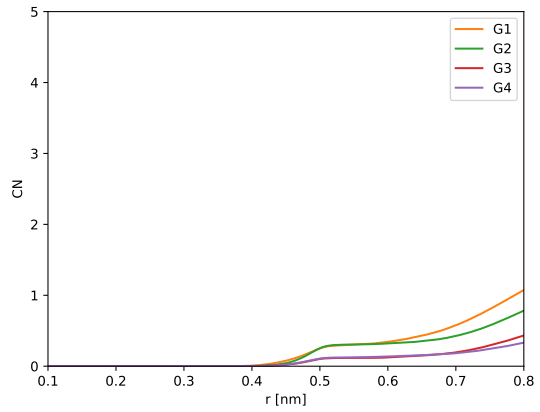

**Li<sup>+</sup> – Li<sup>+</sup> 300mM 5,000 ppm**

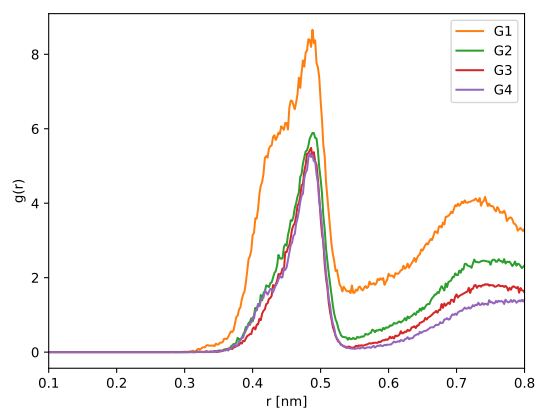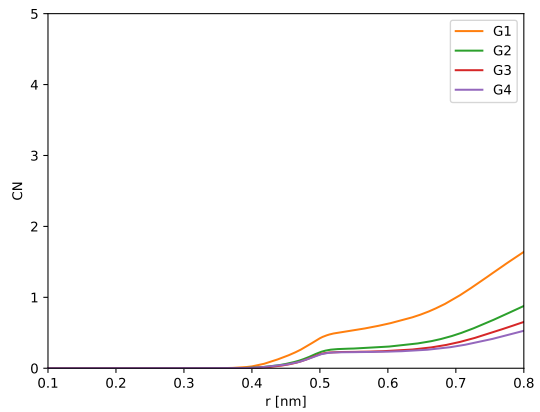

**Li<sup>+</sup> – Li<sup>+</sup> 300mM 20,000 ppm**

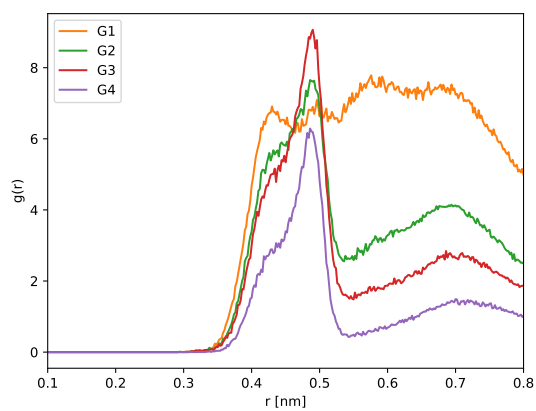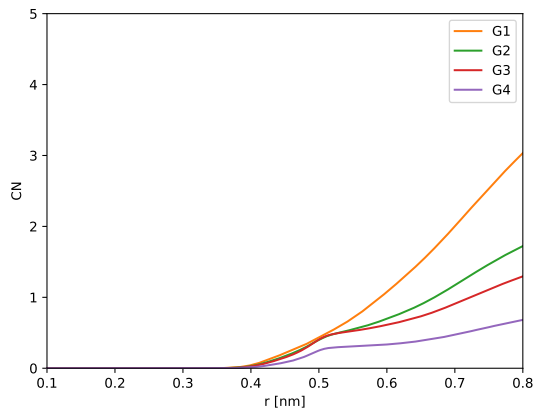

**Li<sup>+</sup> – Li<sup>+</sup> 400mM neat**

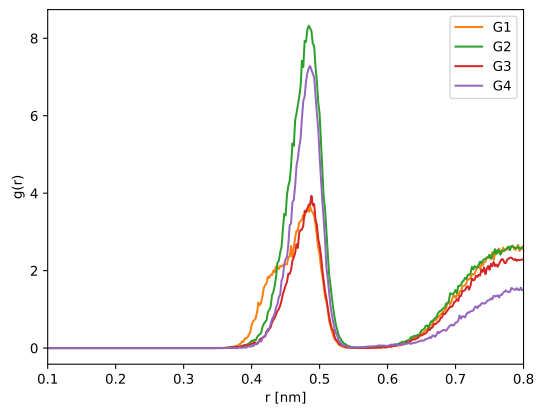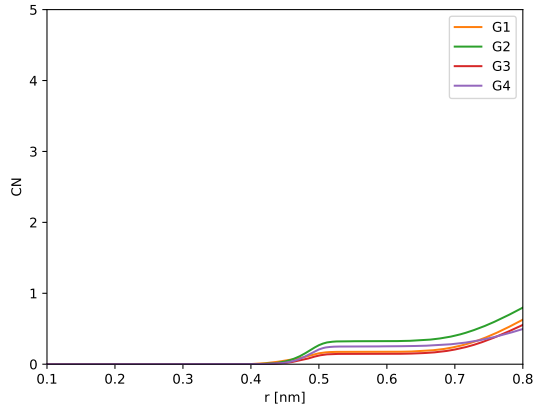

**Li<sup>+</sup> – Li<sup>+</sup> 400mM 1,000 ppm**

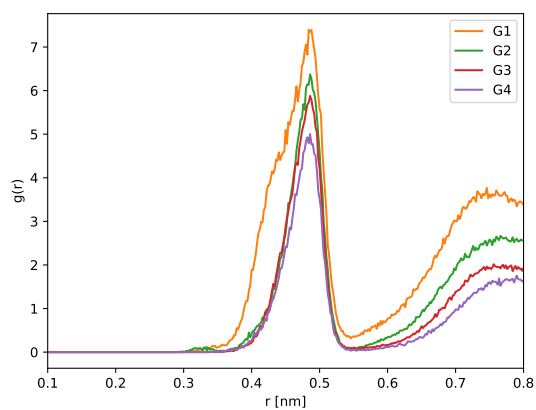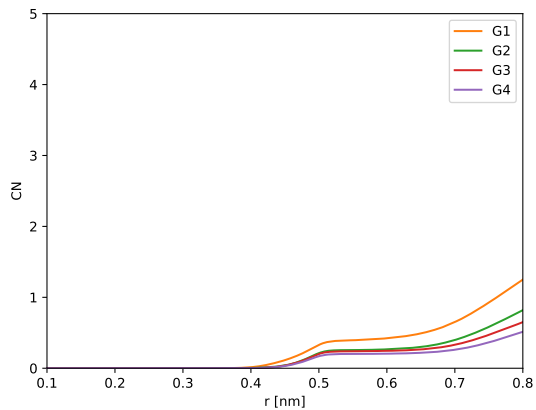

**Li<sup>+</sup> – Li<sup>+</sup> 400mM 5,000 ppm**

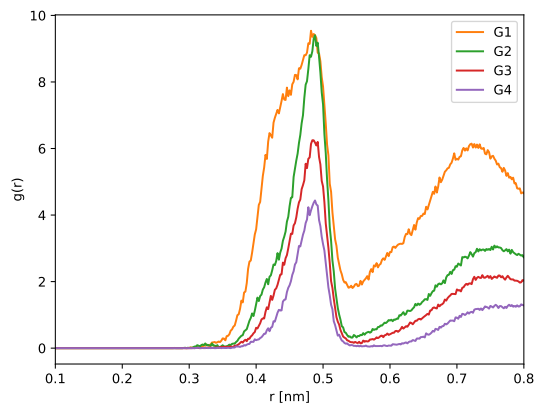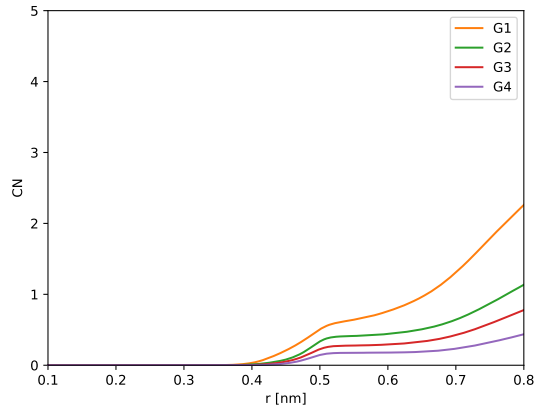

**Li<sup>+</sup> – Li<sup>+</sup> 400mM 20,000 ppm**

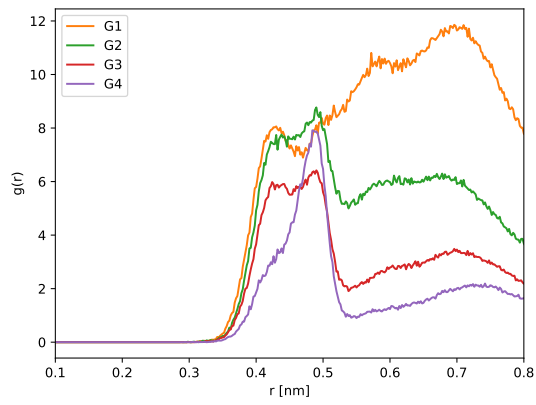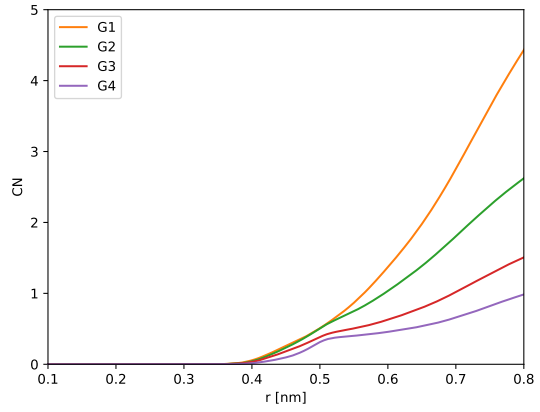

## 2.9 Li<sup>+</sup> – TFSI

Note that here the analysis uses the full TFSI molecule, hence the larger CN values.

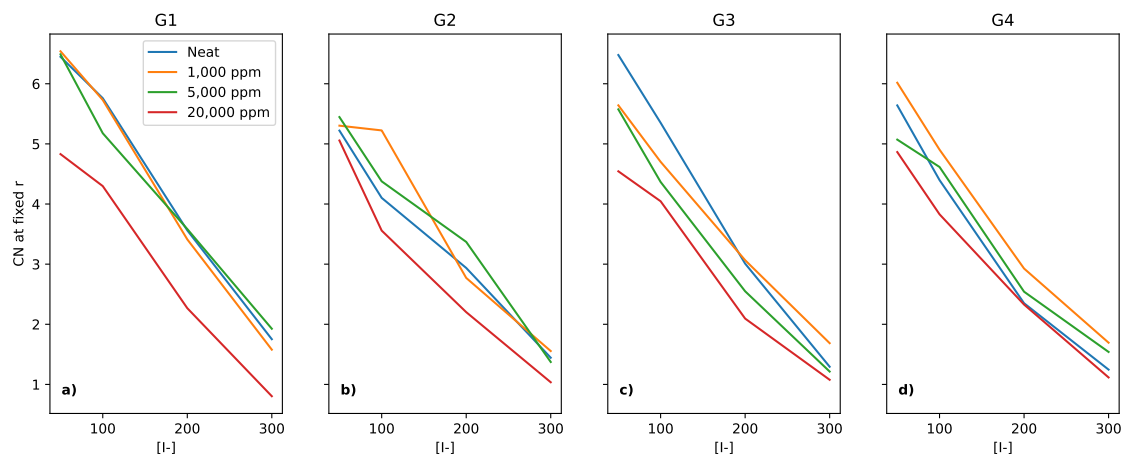

Figure 17: Coordination number of Li<sup>+</sup> to TFSI (the full molecule) at a fixed distance of 5 Å, for the four different glymes (G1 = yellow, G2 = green, G3 = red, G4 = purple) studied here, across the four different water concentrations (with a): neat, b): 1,000, c): 5,000, d): 20,000 ppm of water).

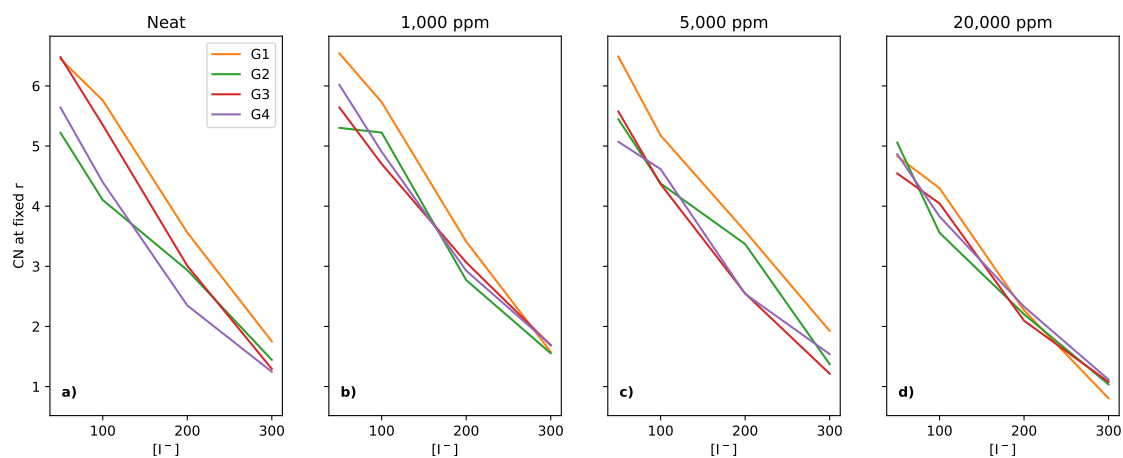

Figure 18: Coordination number of Li<sup>+</sup> to TFSI (the full molecule) at a fixed distance of 5 Å, for the four different glymes (G1 = yellow, G2 = green, G3 = red, G4 = purple) studied here, across the four different water concentrations (with a): neat, b): 1,000, c): 5,000, d): 20,000 ppm of water).



**Li<sup>+</sup> – TFSI 50mM neat**

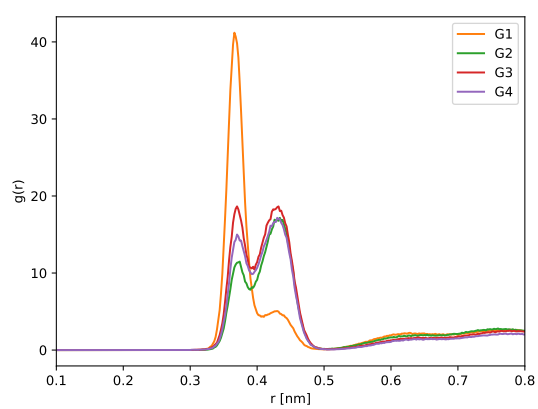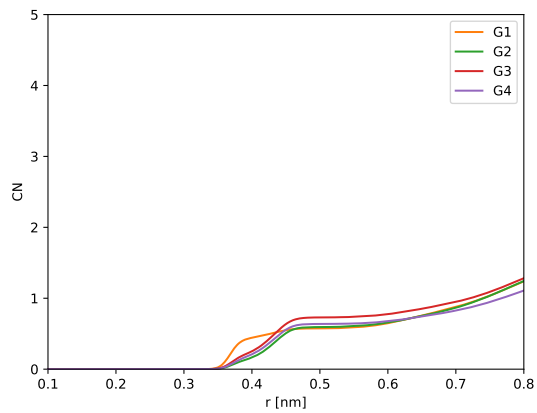

**Li<sup>+</sup> – TFSI 50mM 1,000 ppm**

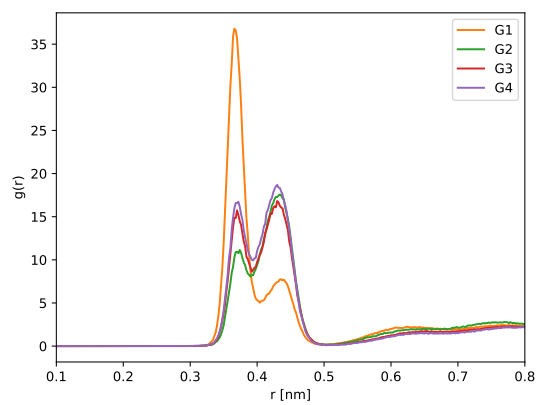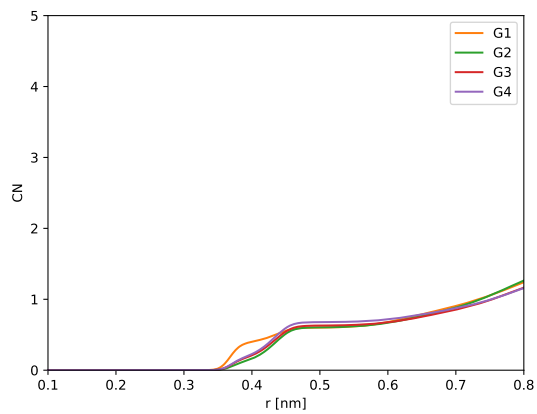

**Li<sup>+</sup> – TFSI 50mM 5,000 ppm**

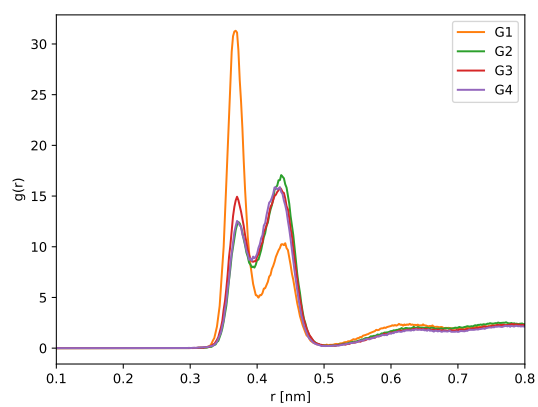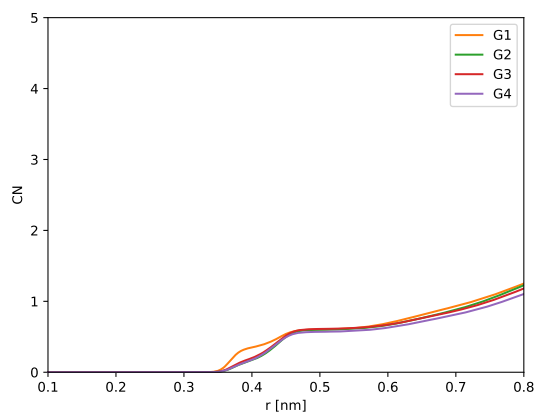

**Li<sup>+</sup> – TFSI 50mM 20,000 ppm**

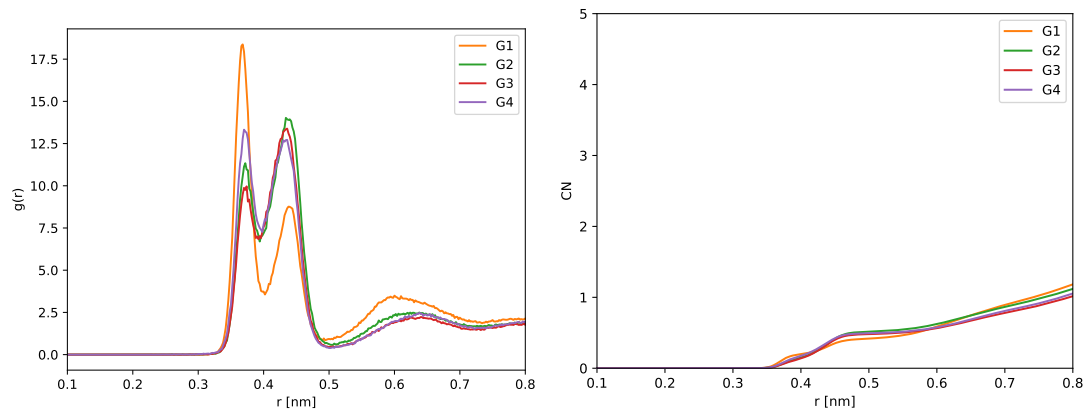

**Li<sup>+</sup> – TFSI 100mM neat**

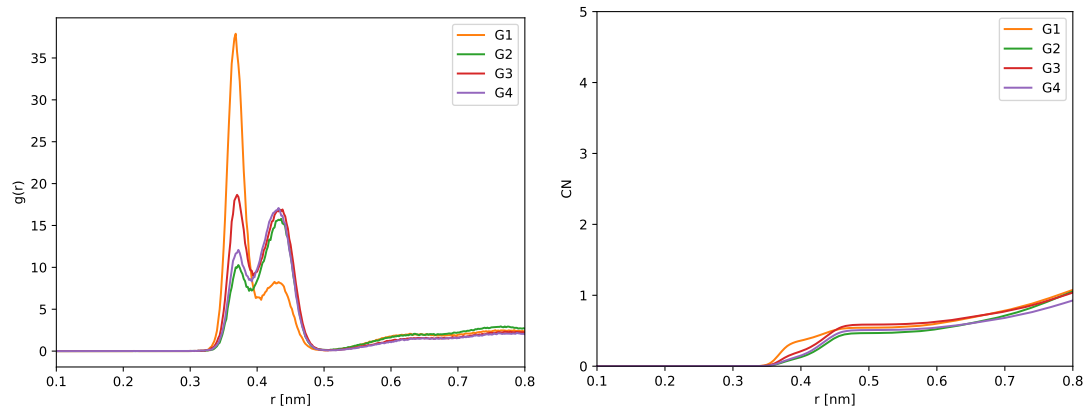

**Li<sup>+</sup> – TFSI 100mM 1,000 ppm**

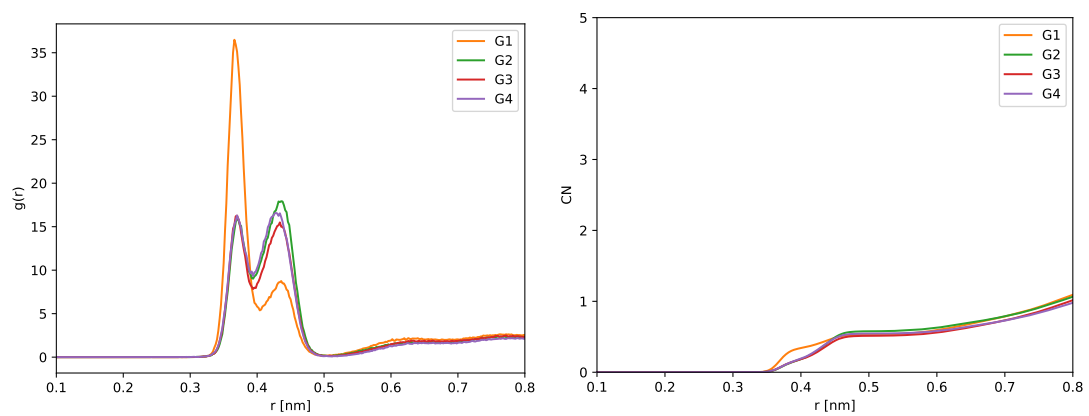

**Li<sup>+</sup> – TFSI 100mM 5,000 ppm**

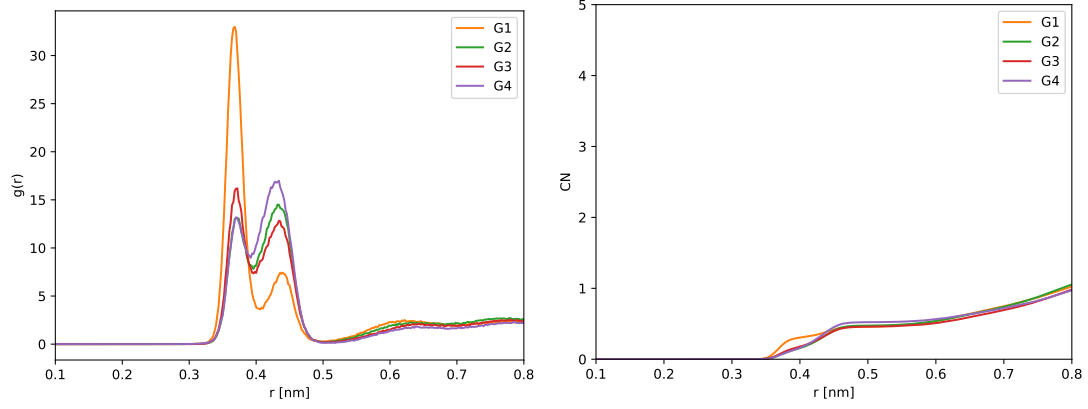

**Li<sup>+</sup> – TFSI 100mM 20,000 ppm**

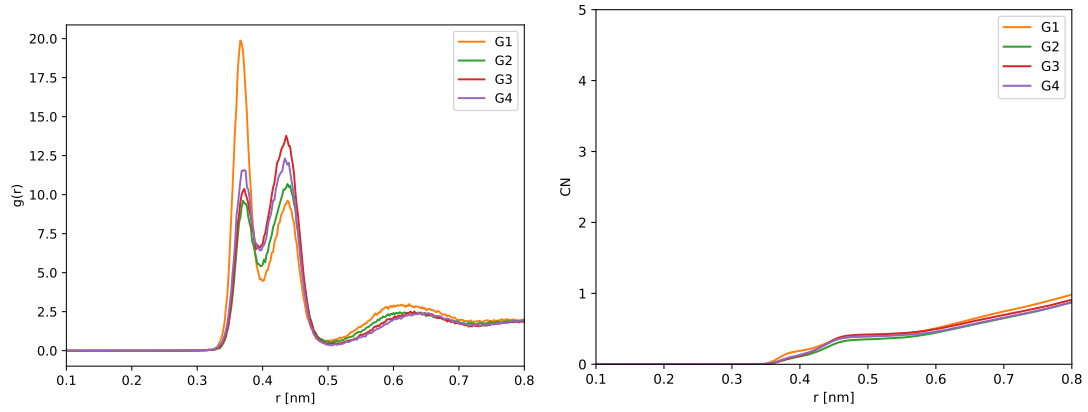

**Li<sup>+</sup> – TFSI 200mM neat**

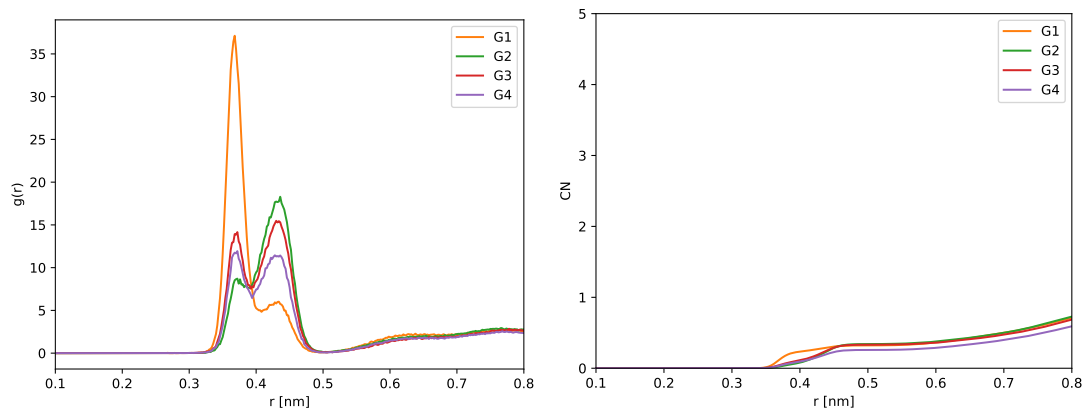

**Li<sup>+</sup> – TFSI 200mM 1,000 ppm**

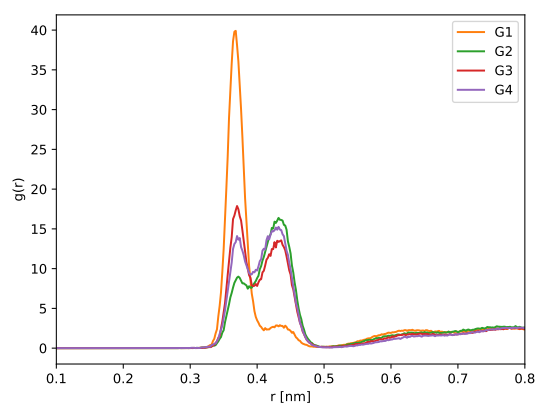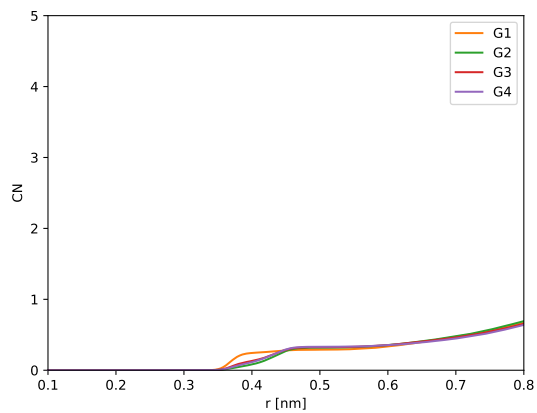

**Li<sup>+</sup> – TFSI 200mM 5,000 ppm**

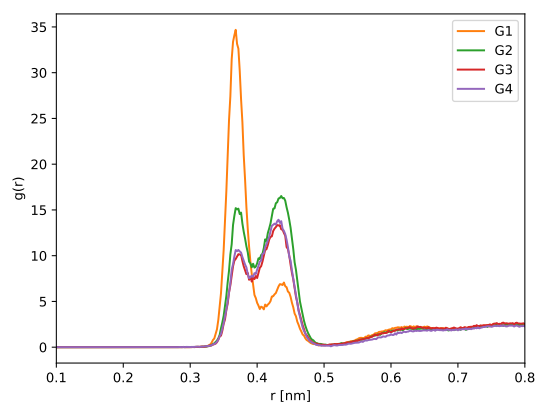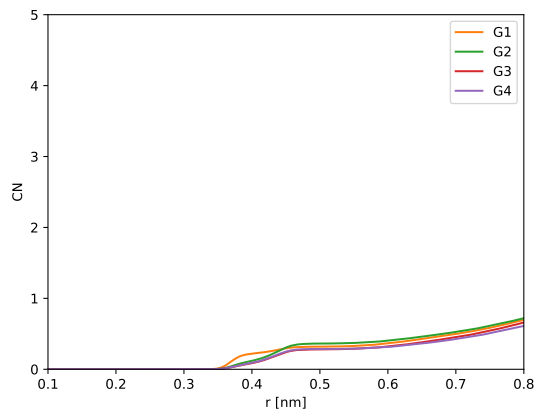

**Li<sup>+</sup> – TFSI 200mM 20,000 ppm**

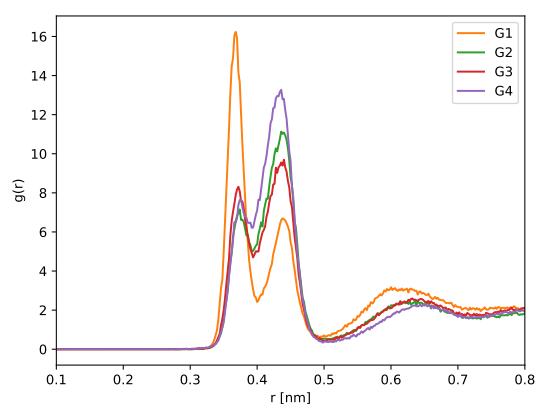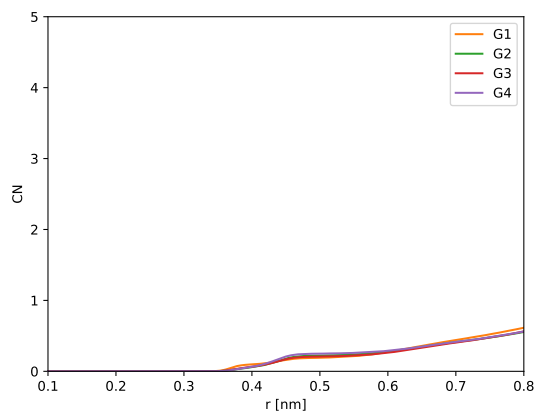

**Li<sup>+</sup> – TFSI 300mM neat**

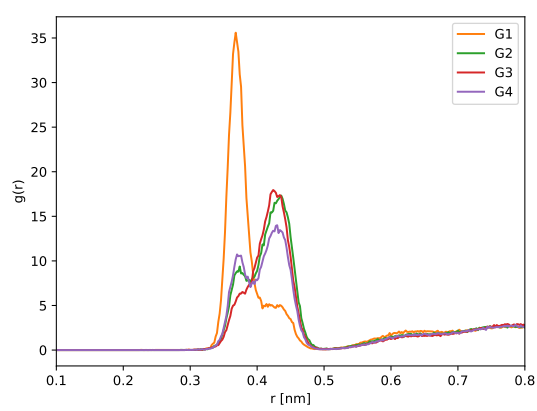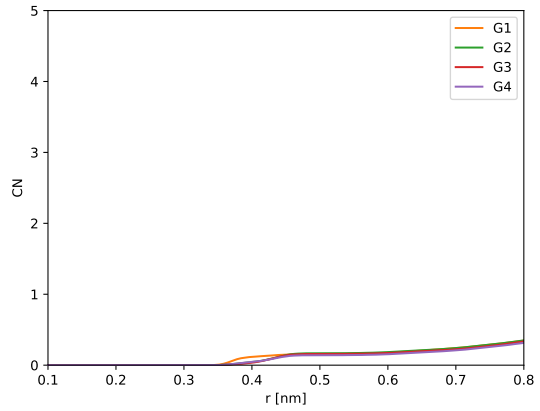

**Li<sup>+</sup> – TFSI 300mM 1,000 ppm**

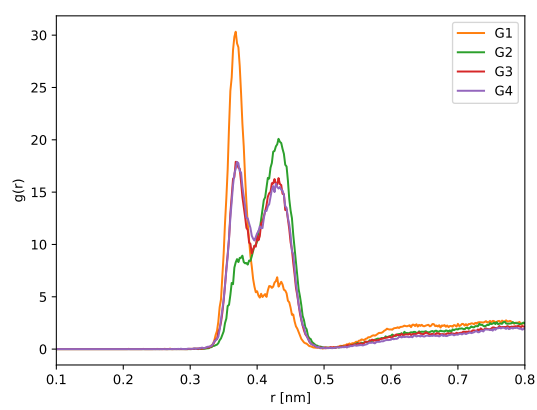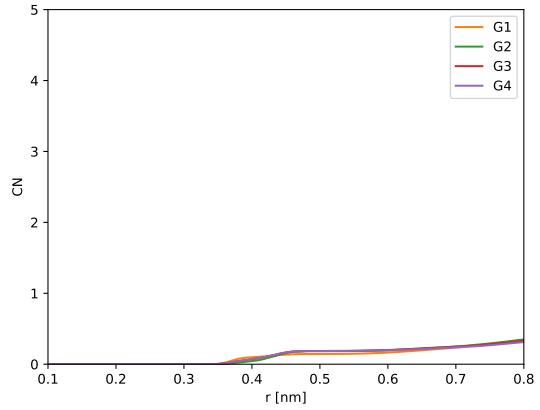

**Li<sup>+</sup> – TFSI 300mM 5,000 ppm**

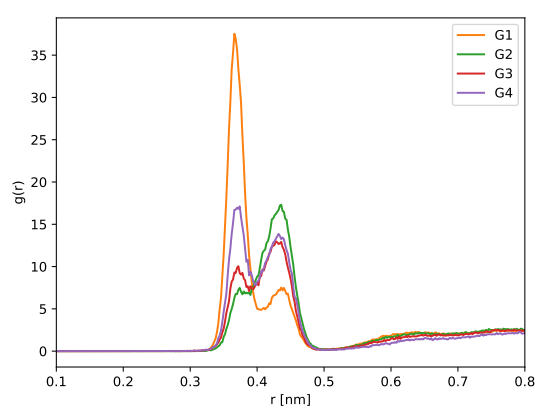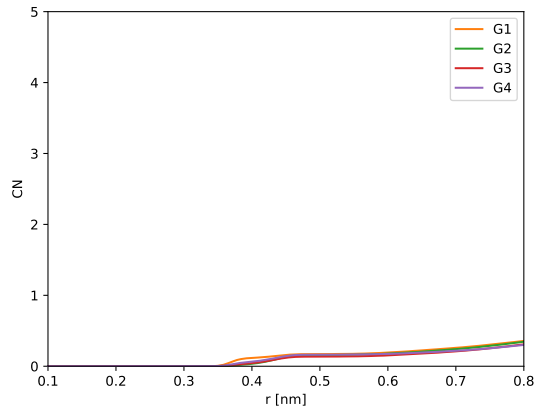

**Li<sup>+</sup> – TFSI 300mM 20,000 ppm**

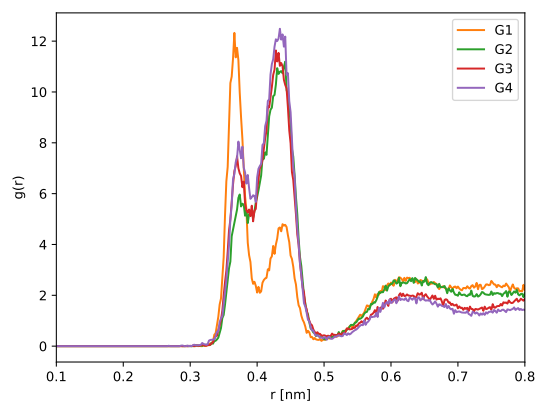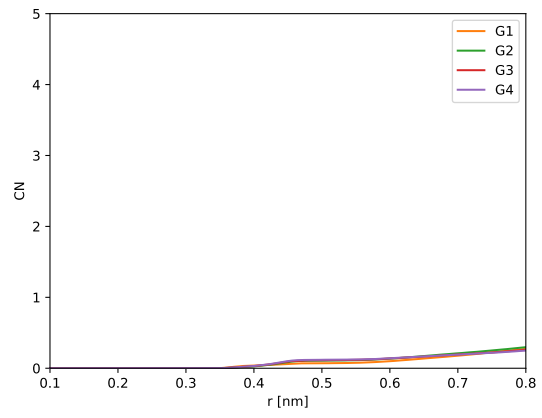

## 2.10 Li<sup>+</sup> – O-H<sub>2</sub>O

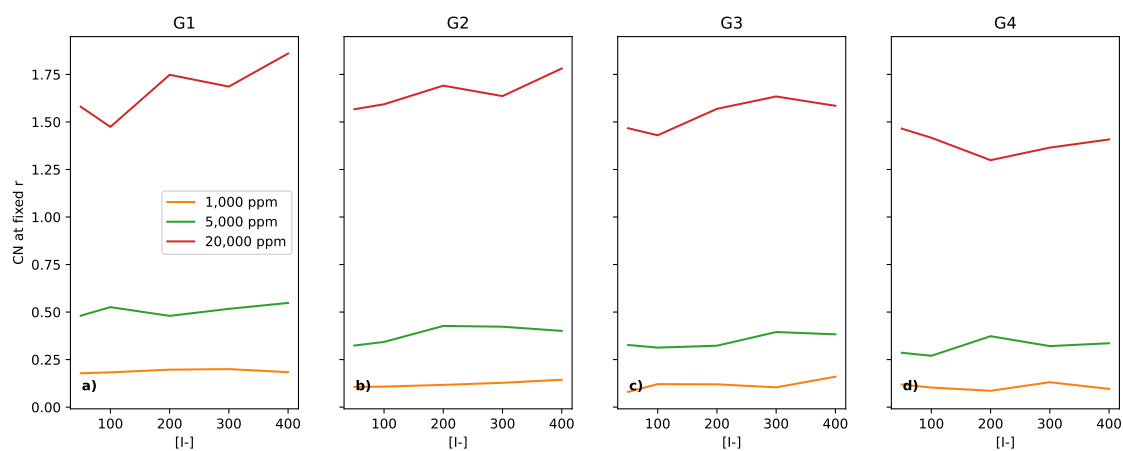

Figure 19: Coordination number of Li<sup>+</sup> to Li<sup>+</sup> at a fixed distance of 3 Å, for the four different glymes (G1 = yellow, G2 = green, G3 = red, G4 = purple) studied here, across the four different water concentrations (with a): neat, b): 1,000, c): 5,000, d): 20,000 ppm of water).

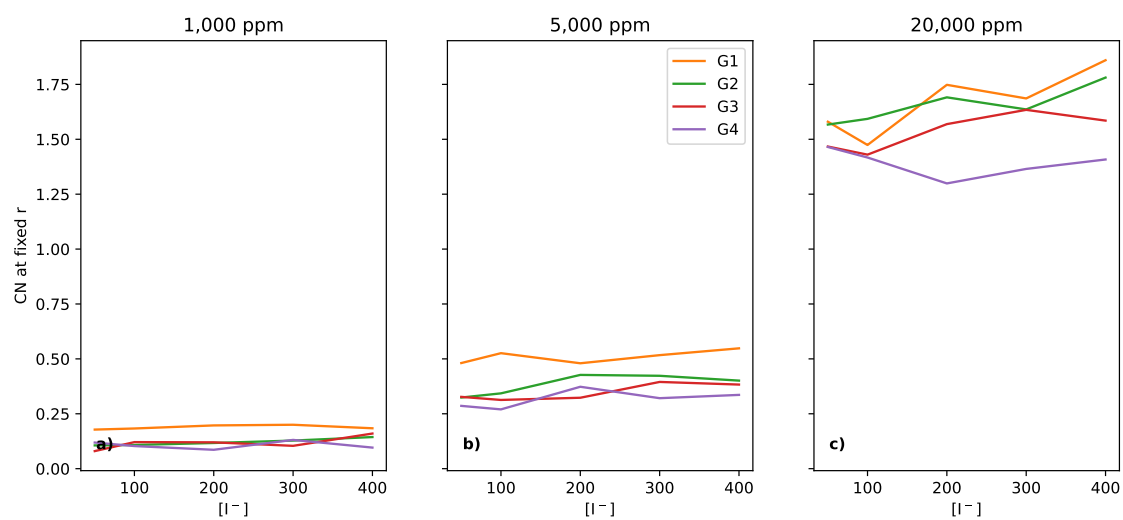

Figure 20: Coordination number of Li<sup>+</sup> to O (of H<sub>2</sub>O) at a fixed distance of 3 Å, for the four different glymes (G1 = yellow, G2 = green, G3 = red, G4 = purple) studied here, across the four different water concentrations (with a): neat, b): 1,000, c): 5,000, d): 20,000 ppm of water).

**Li<sup>+</sup> – O-H<sub>2</sub>O 50mM 1,000 ppm**

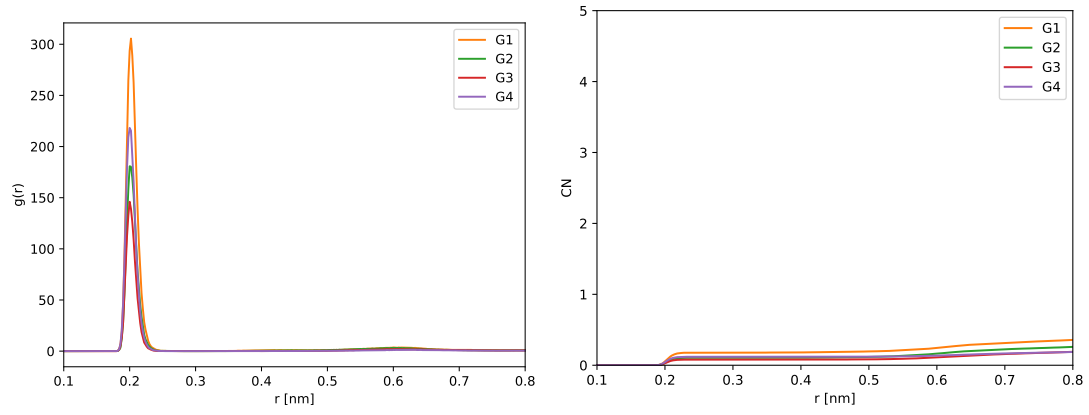

**Li<sup>+</sup> – O-H<sub>2</sub>O 50mM 5,000 ppm**

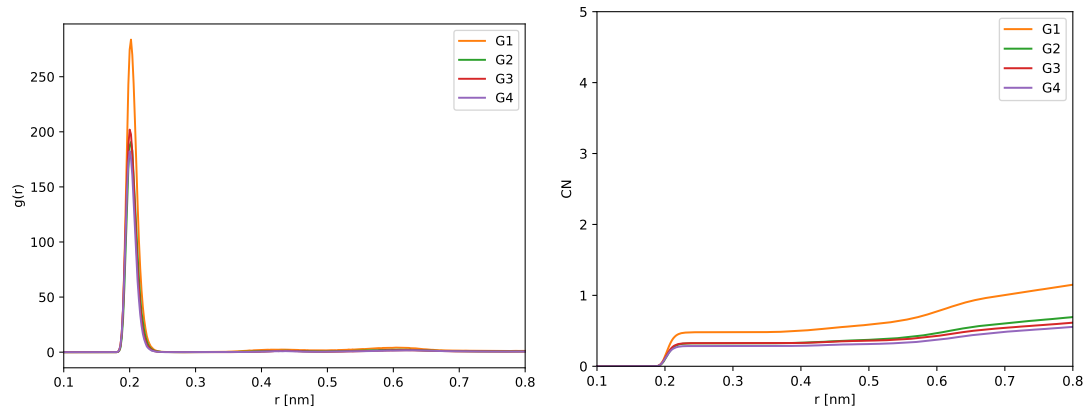

**Li<sup>+</sup> – O-H<sub>2</sub>O 50mM 20,000 ppm**

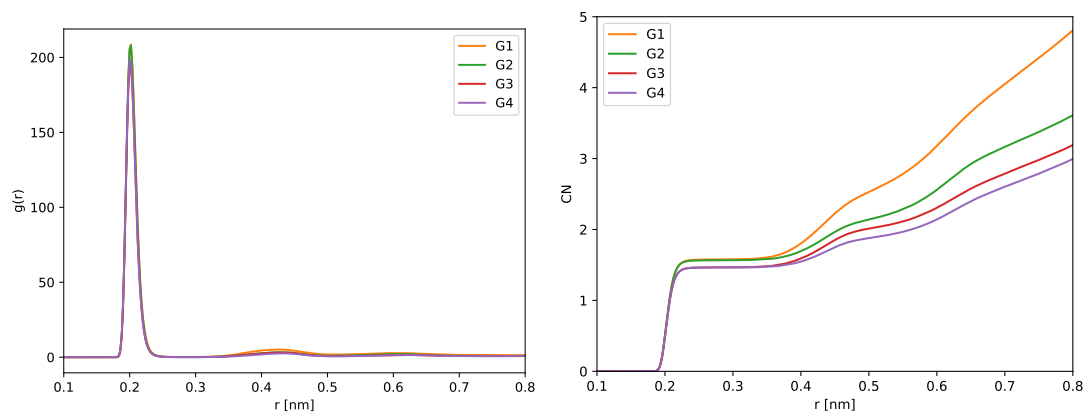



**Li<sup>+</sup> – O-H<sub>2</sub>O 100mM 1,000 ppm**

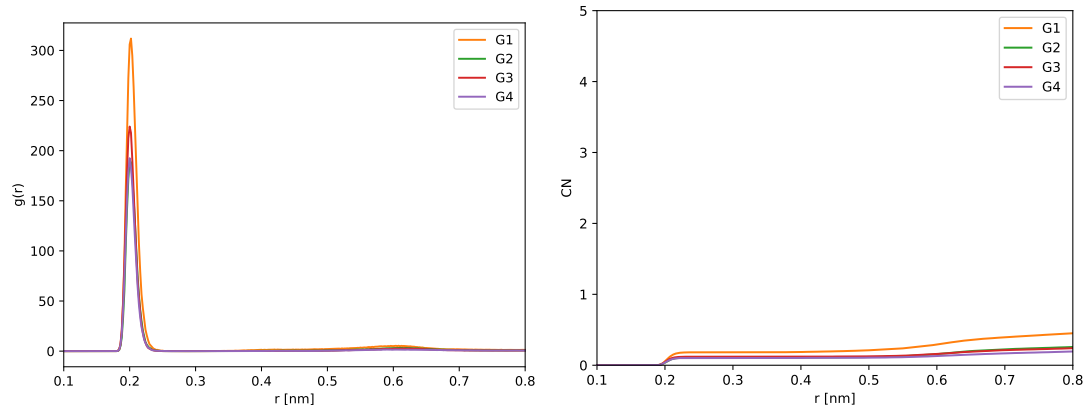

**Li<sup>+</sup> – O-H<sub>2</sub>O 100mM 5,000 ppm**

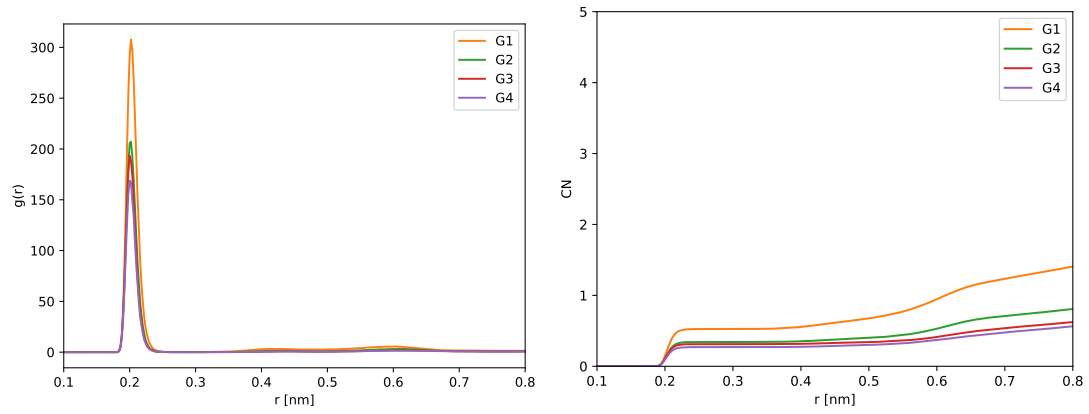

**Li<sup>+</sup> – O-H<sub>2</sub>O 100mM 20,000 ppm**

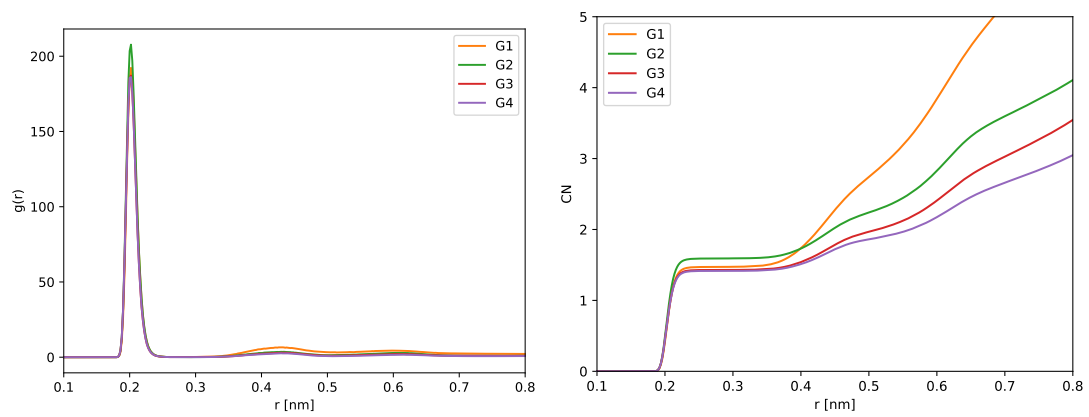

**Li<sup>+</sup> – O-H<sub>2</sub>O 200mM 1,000 ppm**

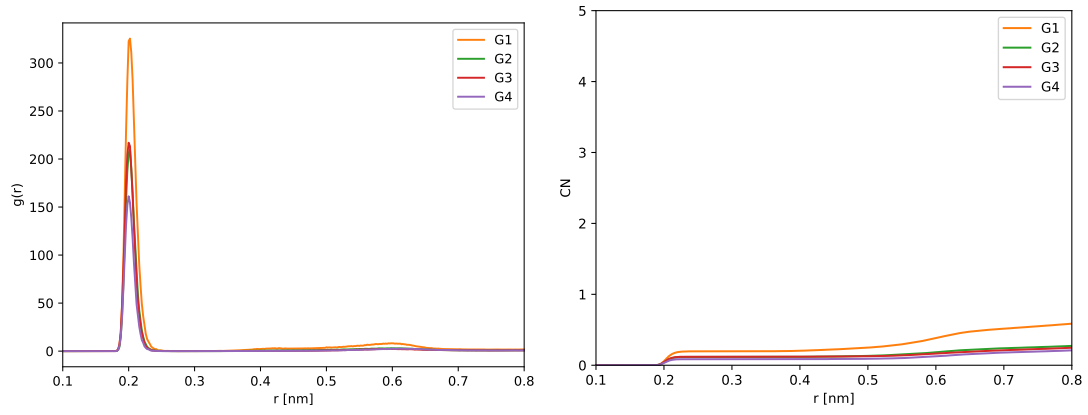

**Li<sup>+</sup> – O-H<sub>2</sub>O 200mM 5,000 ppm**

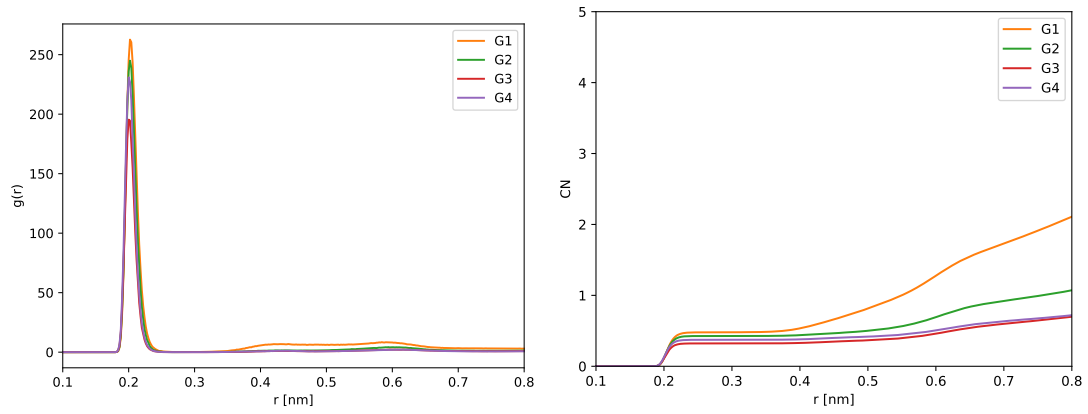

**Li<sup>+</sup> – O-H<sub>2</sub>O 200mM 20,000 ppm**

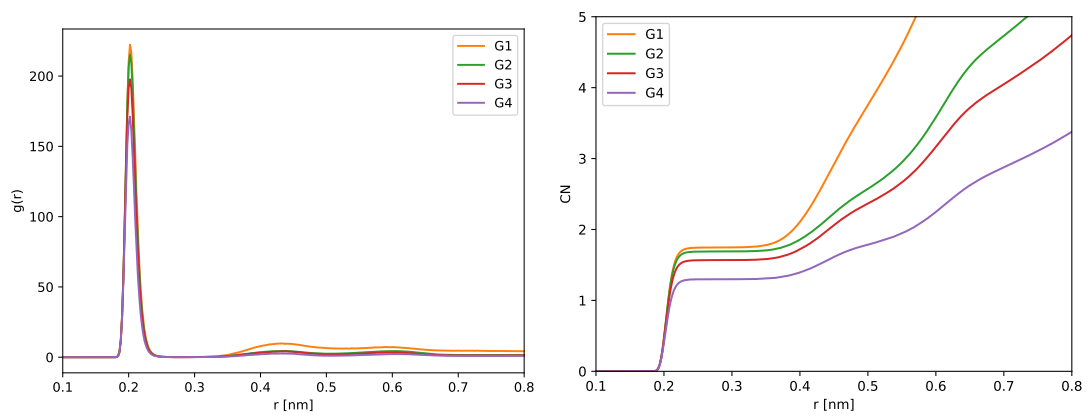

**Li<sup>+</sup> – O-H<sub>2</sub>O 300mM 1,000 ppm**

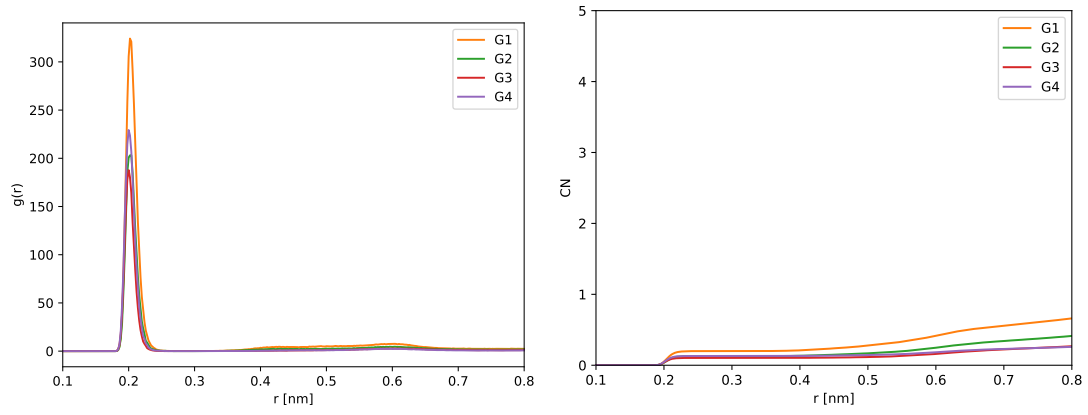

**Li<sup>+</sup> – O-H<sub>2</sub>O 300mM 5,000 ppm**

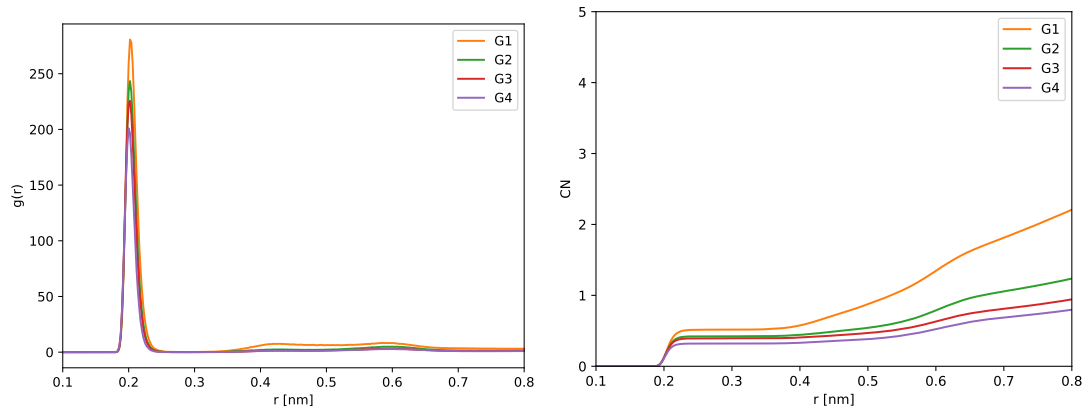

**Li<sup>+</sup> – O-H<sub>2</sub>O 300mM 20,000 ppm**

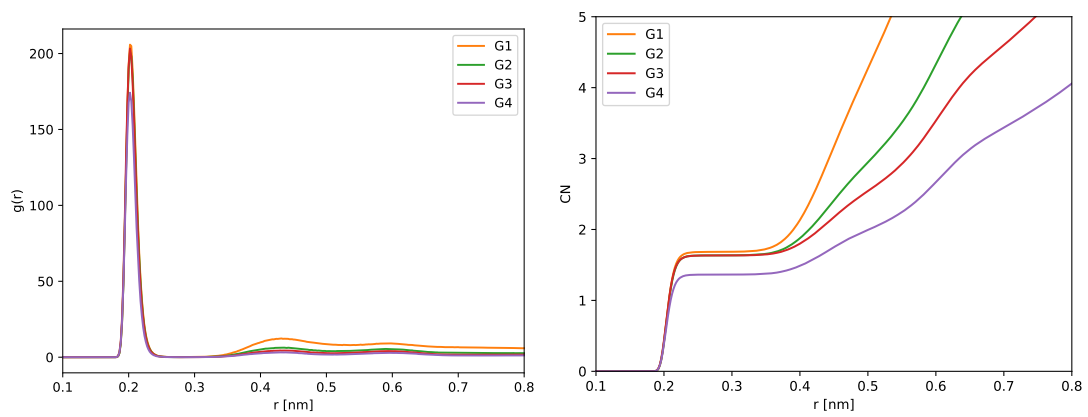

**Li<sup>+</sup> – O-H<sub>2</sub>O 400mM 1,000 ppm**

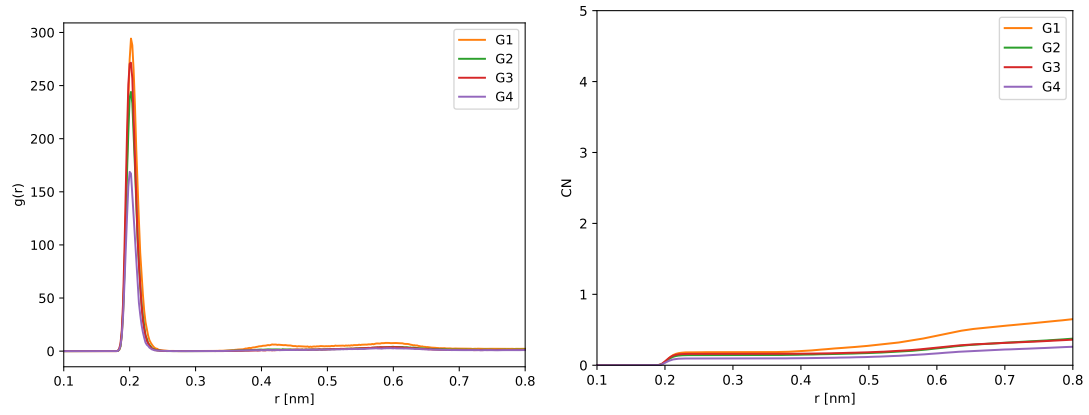

**Li<sup>+</sup> – O-H<sub>2</sub>O 400mM 5,000 ppm**

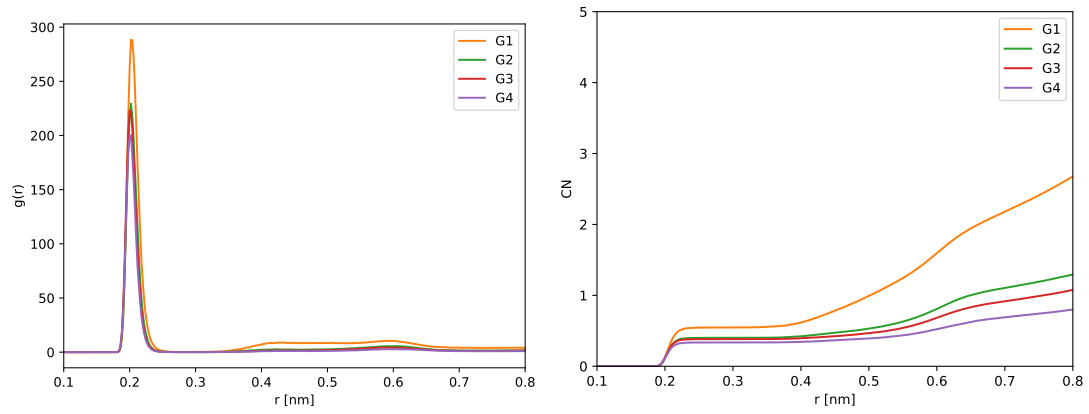

**Li<sup>+</sup> – O-H<sub>2</sub>O 400mM 20,000 ppm**

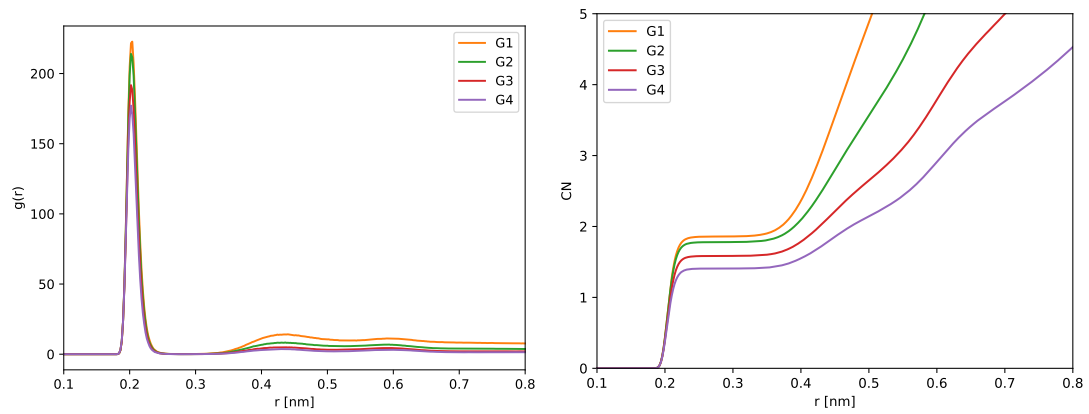

## 2.11 Li<sup>+</sup> – O-solvent

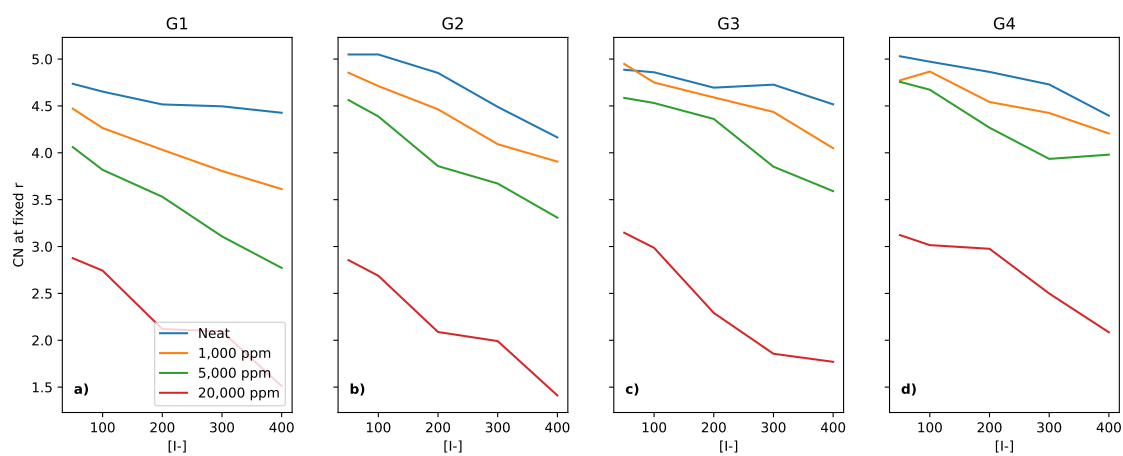

Figure 21: Coordination number of Li<sup>+</sup> to Li<sup>+</sup> at a fixed distance of 3 Å, for the four different glymes (G1 = yellow, G2 = green, G3 = red, G4 = purple) studied here, across the four different water concentrations (with a): neat, b): 1,000, c): 5,000, d): 20,000 ppm of water).

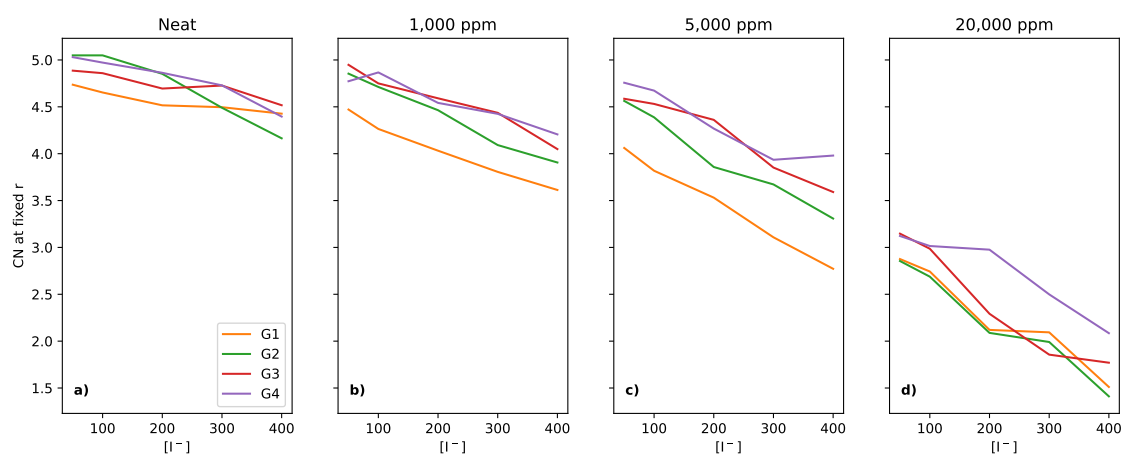

Figure 22: Coordination number of Li<sup>+</sup> to O (of the solvent) at a fixed distance of 3 Å, for the four different glymes (G1 = yellow, G2 = green, G3 = red, G4 = purple) studied here, across the four different water concentrations (with a): neat, b): 1,000, c): 5,000, d): 20,000 ppm of water).

**Li<sup>+</sup> – O-solvent 50mM neat**

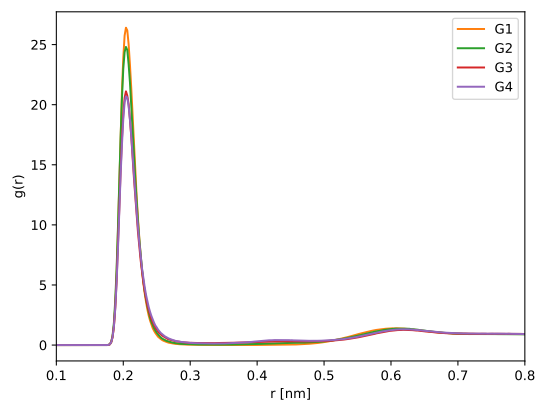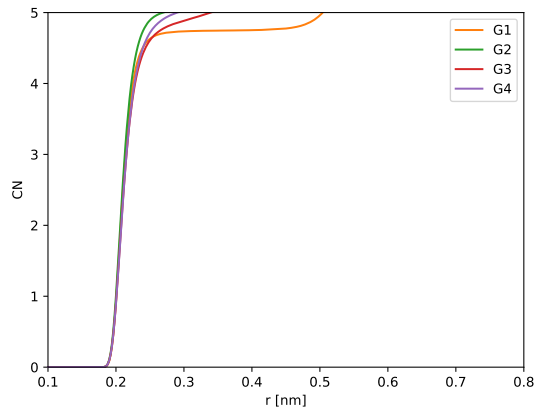

**Li<sup>+</sup> – O-solvent 50mM 1,000 ppm**

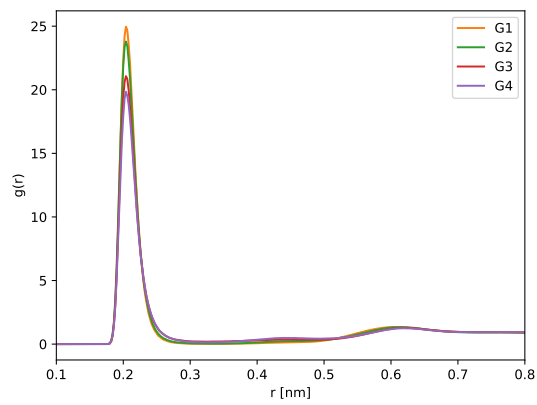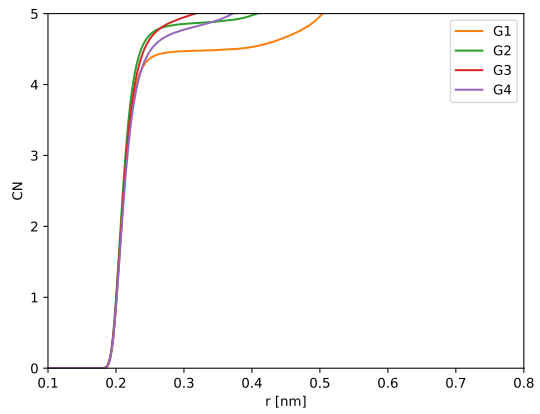

**Li<sup>+</sup> – O-solvent 50mM 5,000 ppm**

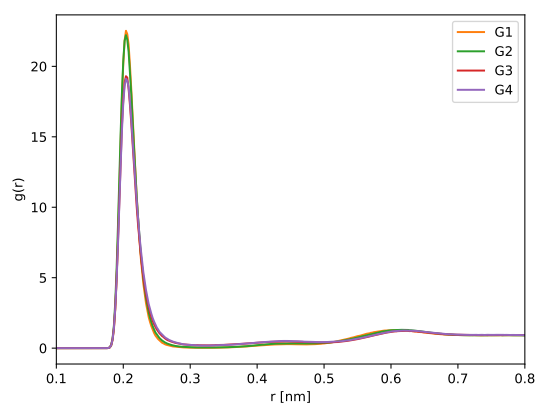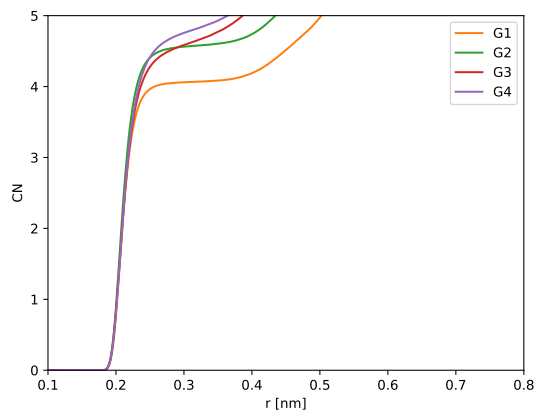

**Li<sup>+</sup> – O-solvent 50mM 20,000 ppm**

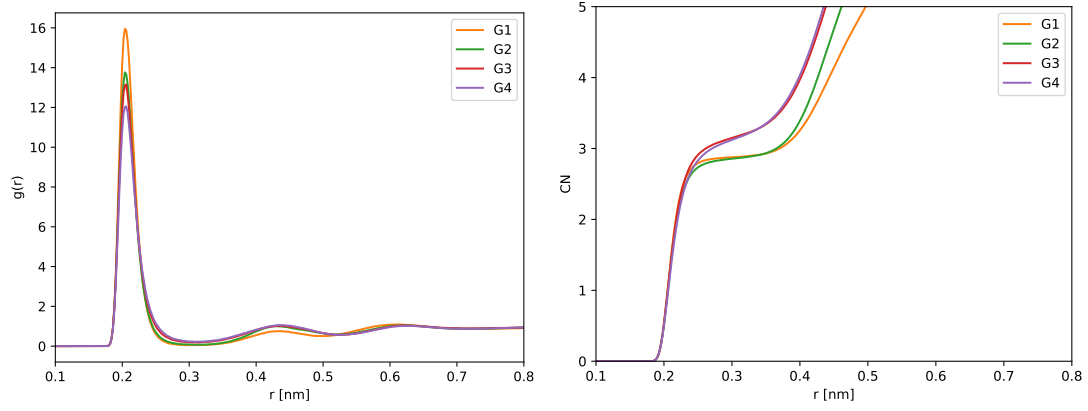

**Li<sup>+</sup> – O-solvent 100mM neat**

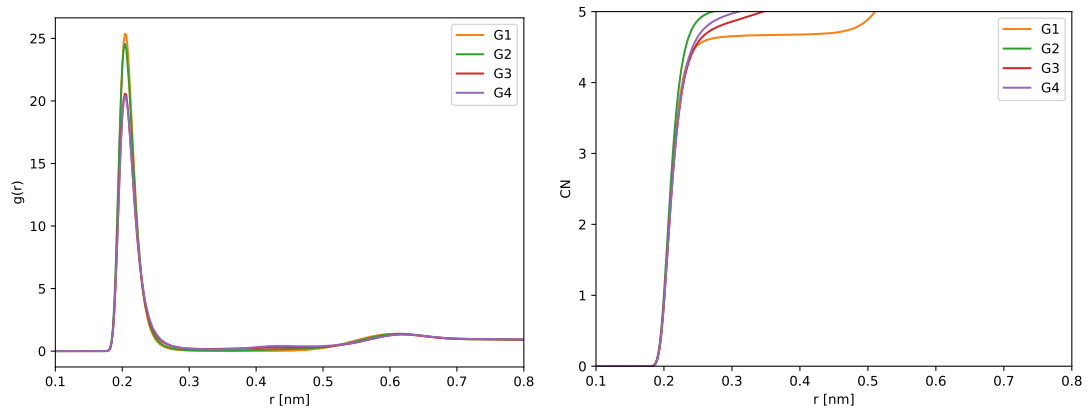

**Li<sup>+</sup> – O-solvent 100mM 1,000 ppm**

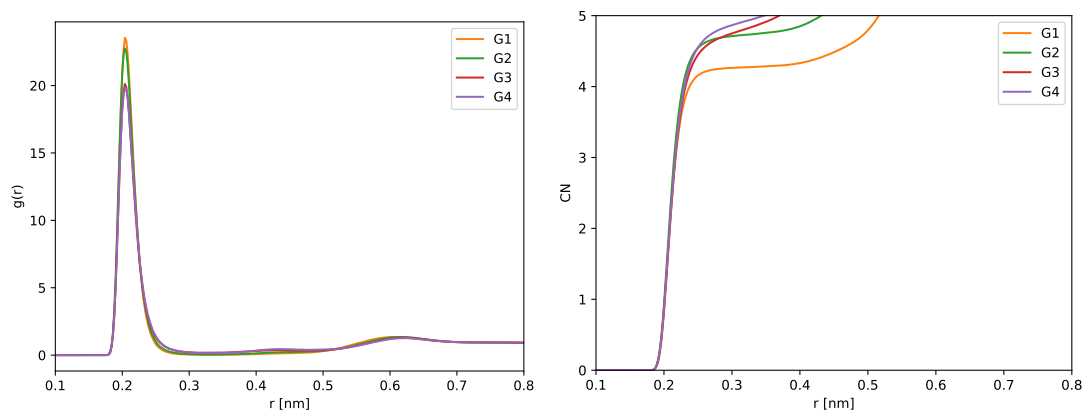

**Li<sup>+</sup> – O-solvent 100mM 5,000 ppm**

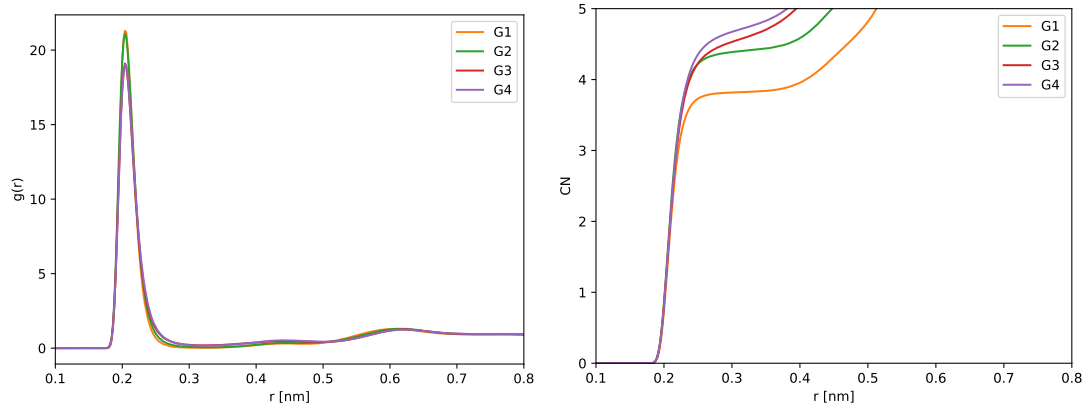

**Li<sup>+</sup> – O-solvent 100mM 20,000 ppm**

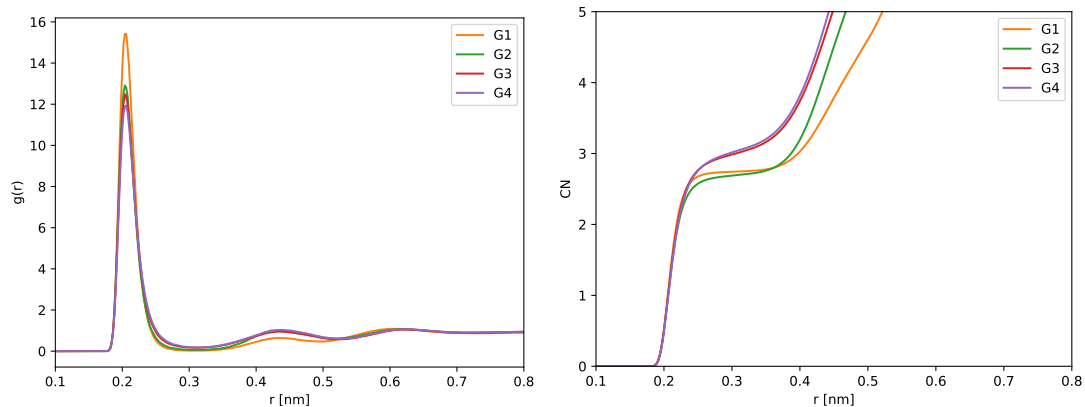

**Li<sup>+</sup> – O-solvent 200mM neat**

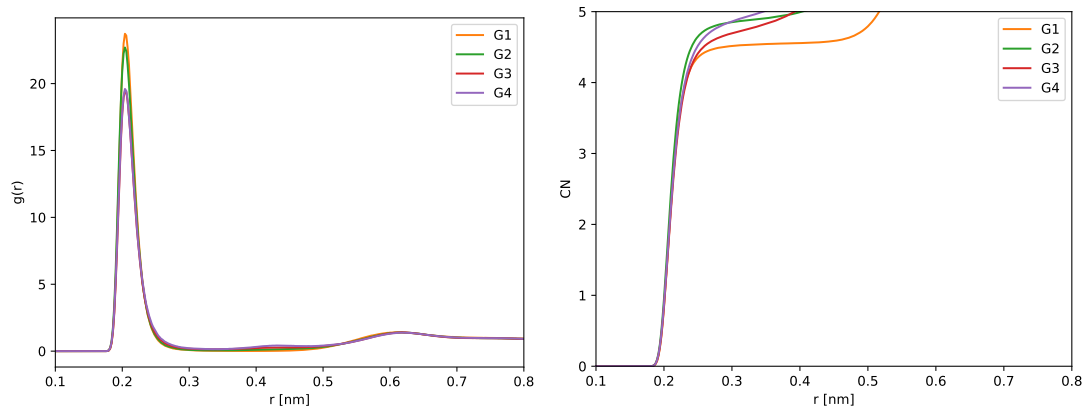



**Li<sup>+</sup> – O-solvent 200mM 1,000 ppm**

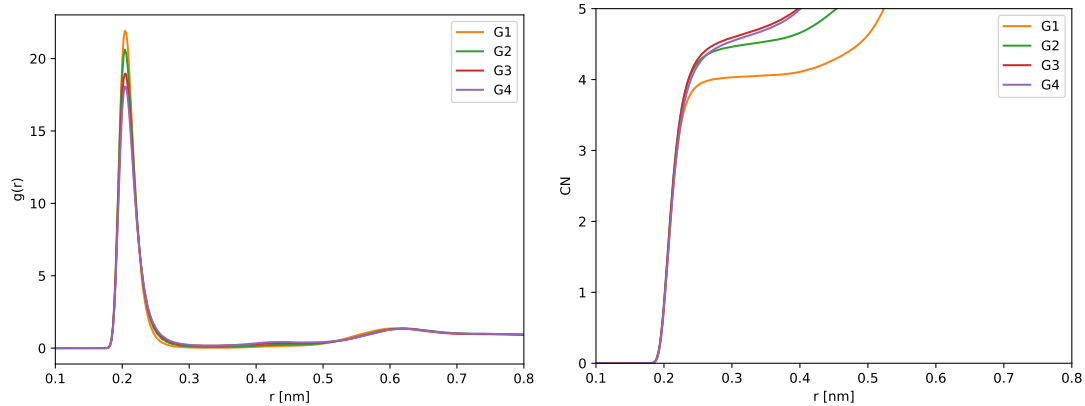

**Li<sup>+</sup> – O-solvent 200mM 5,000 ppm**

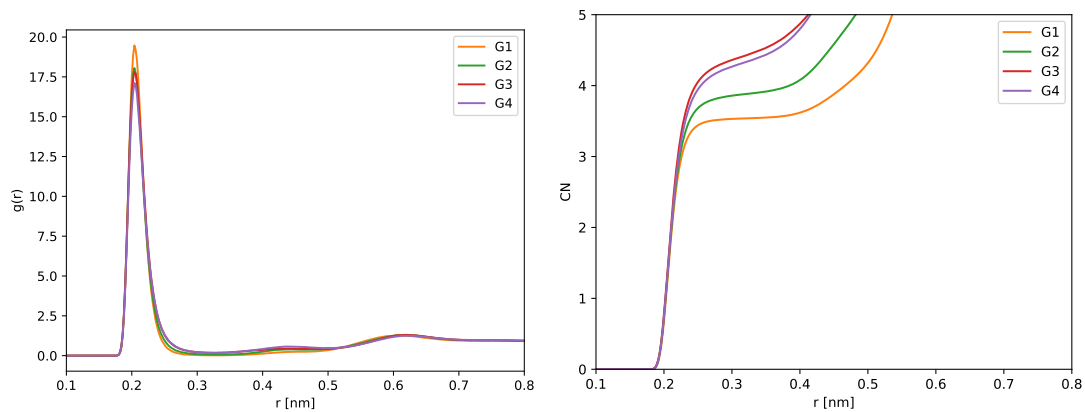

**Li<sup>+</sup> – O-solvent 200mM 20,000 ppm**

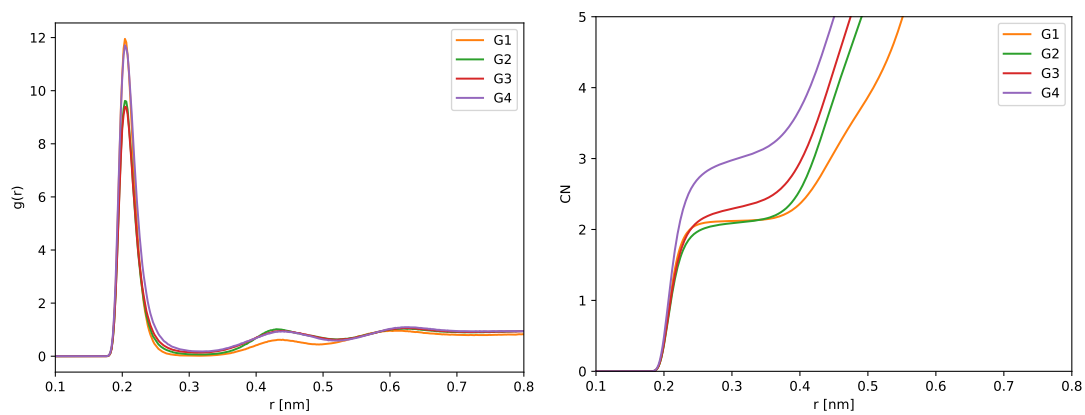

**Li<sup>+</sup> – O-solvent 300mM neat**

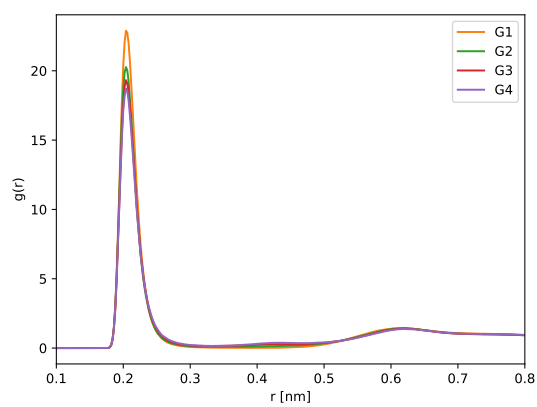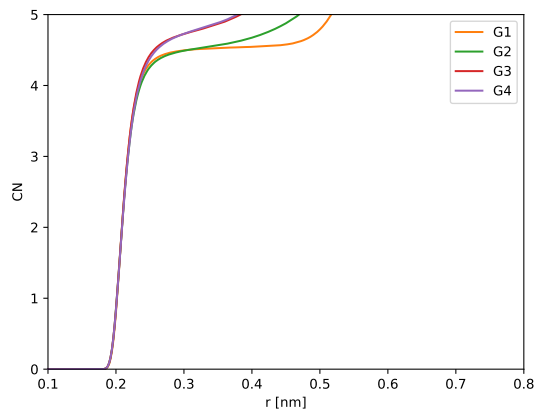

**Li<sup>+</sup> – O-solvent 300mM 1,000 ppm**

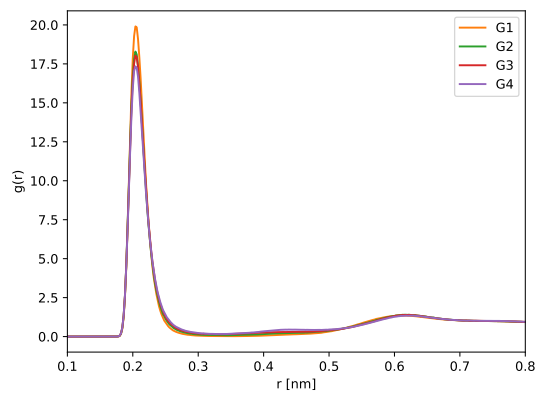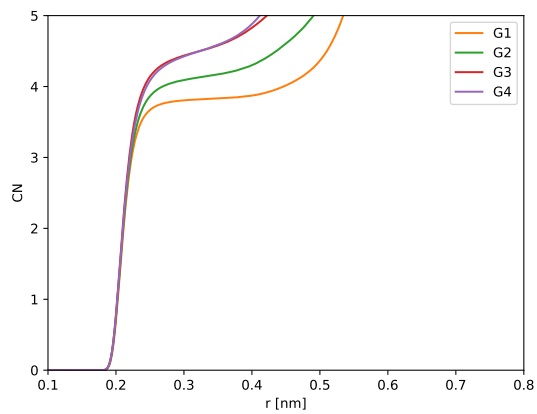

**Li<sup>+</sup> – O-solvent 300mM 5,000 ppm**

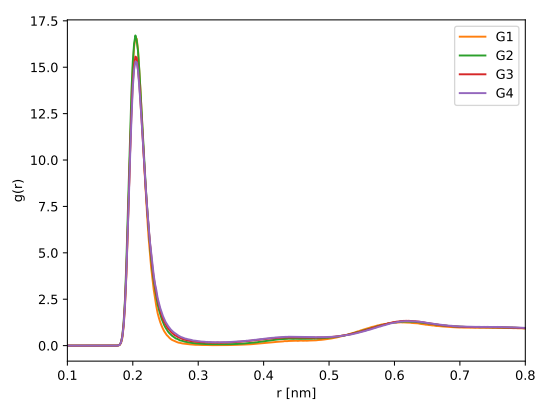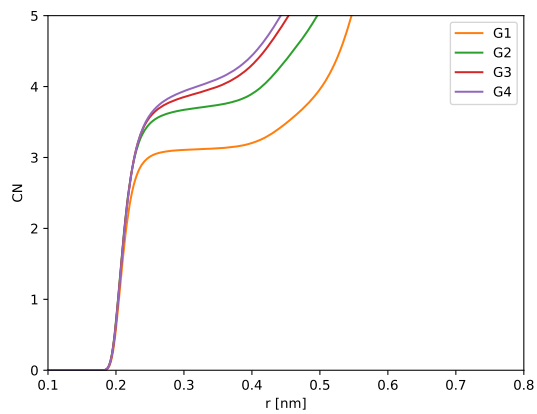

**Li<sup>+</sup> – O-solvent 300mM 20,000 ppm**

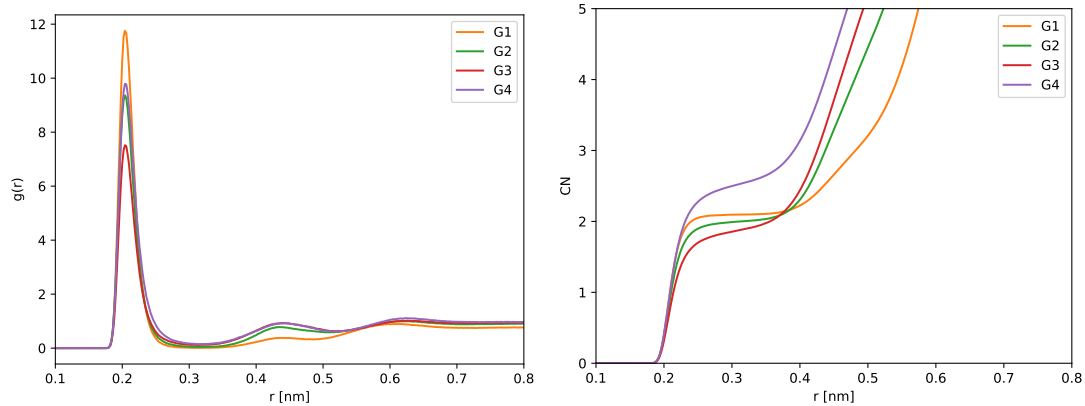

**Li<sup>+</sup> – O-solvent 400mM neat**

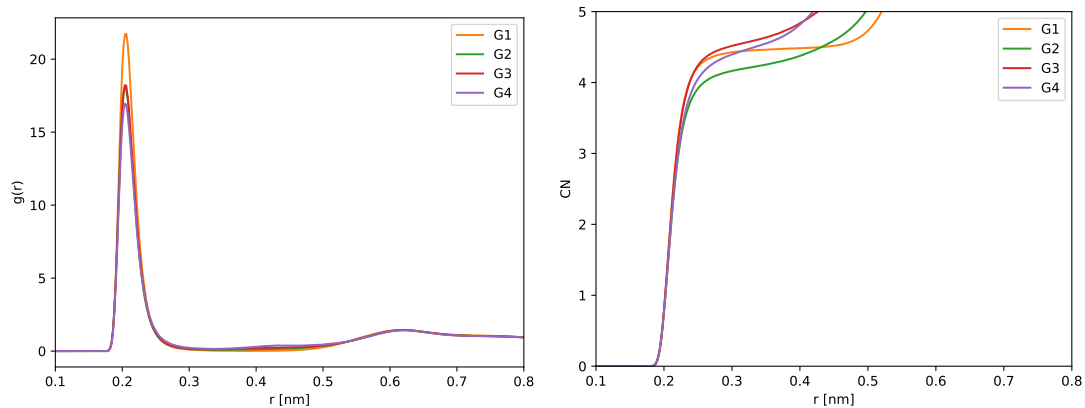

**Li<sup>+</sup> – O-solvent 400mM 1,000 ppm**

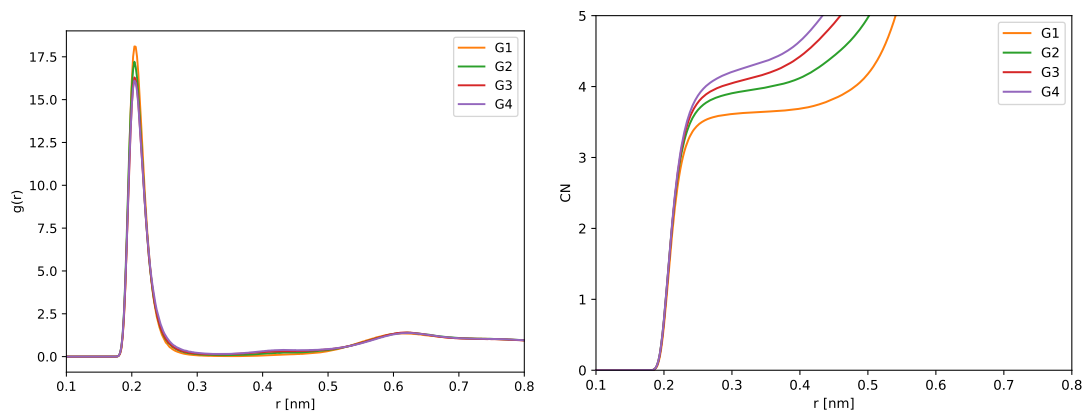

**Li<sup>+</sup> – O-solvent 400mM 5,000 ppm**

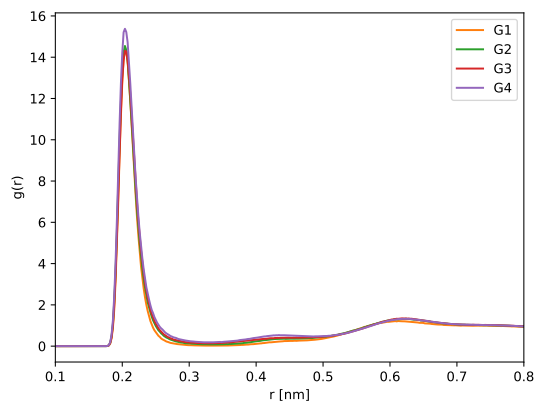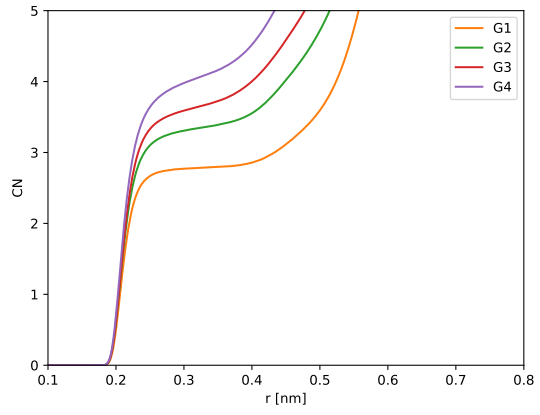

**Li<sup>+</sup> – O-solvent 400mM 20,000 ppm**

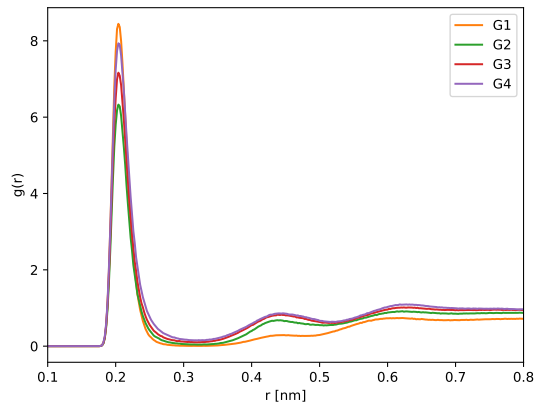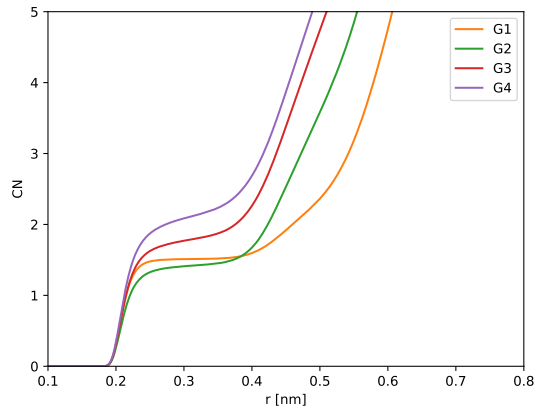

Supplement: d3fd00090g1.pdf [file d3fd00090g1.pdf]
